# Supplementary material for: Peptide synthesis beyond DMF: THF and ACN as excellent and friendlier alternatives
Source: Royal Society of Chemistry journal article supplement (doi:10.1039/c4ob02046d), 2014-12-16

## Supporting Information

### Peptide Synthesis Beyond DMF: THF and ACN as Excellent and Friendlier Alternatives

**Yahya E. Jad,<sup>a</sup> Gerardo A. Acosta,<sup>b,c</sup> Sherine N. Khattab,<sup>d</sup> Beatriz G. de la Torre,<sup>a,e</sup> Thavendran Govender,<sup>a</sup> Hendrik G. Kruger,<sup>a</sup> Ayman El-Faham<sup>\*d,f</sup> and Fernando Albericio<sup>\*a,b,c,e,f,g,h</sup>**

<sup>a</sup> Catalysis and Peptide Research Unit, School of Health Sciences, University of Kwazulu-Natal, Durban 4001, South Africa.

<sup>b</sup> Institute for Research in Biomedicine-Barcelona, 08028-Barcelona, Spain. E-mail: [albericio@irbbbarcelona.org](mailto:albericio@irbbbarcelona.org)

<sup>c</sup> CIBER-BBN, Networking Centre on Bioengineering, Biomaterials and Nanomedicine, Barcelona Science Park, 08028-Barcelona, Spain

<sup>d</sup> Department of Chemistry, Faculty of Science, Alexandria University P.O. Box 426, Ibrahimia, Alexandria 21321, Egypt. E-mail: [aymanel\\_faham@hotmail.com](mailto:aymanel_faham@hotmail.com)

<sup>e</sup> School of Chemistry, Yachay Tech, Yachay City of Knowledge, 100119-Urcuqui, Ecuador. E-mail: [falbericio@yachaytech.edu.ec](mailto:falbericio@yachaytech.edu.ec)

<sup>f</sup> Department of Chemistry, College of Science, King Saud University P.O. Box 2455, Riyadh 11451, Saudi Arabia

<sup>g</sup> School of Chemistry and Physics, University of Kwazulu-Natal, Durban 4001, South Africa

<sup>h</sup> Department of Organic Chemistry, University of Barcelona, 08028-Barcelona, Spain

# 1- Z-Phg-Pro-NH<sub>2</sub> Racemization test:

## 1.1- HOBt in DMF

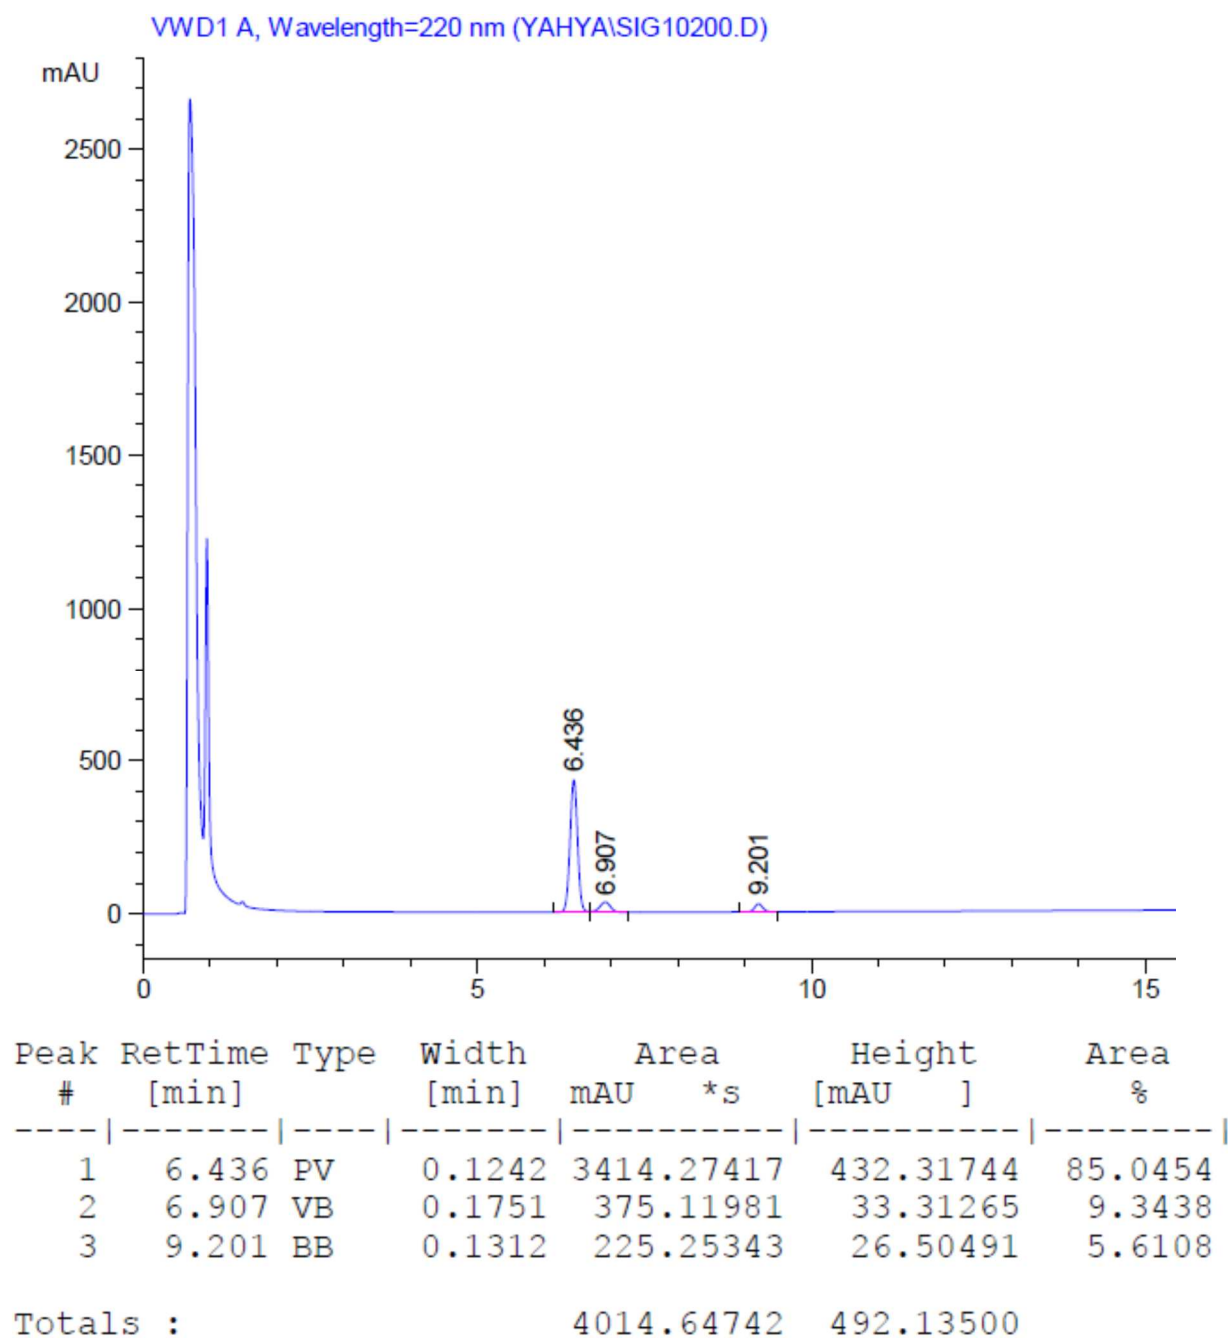

## 1.2- HOBt in THF

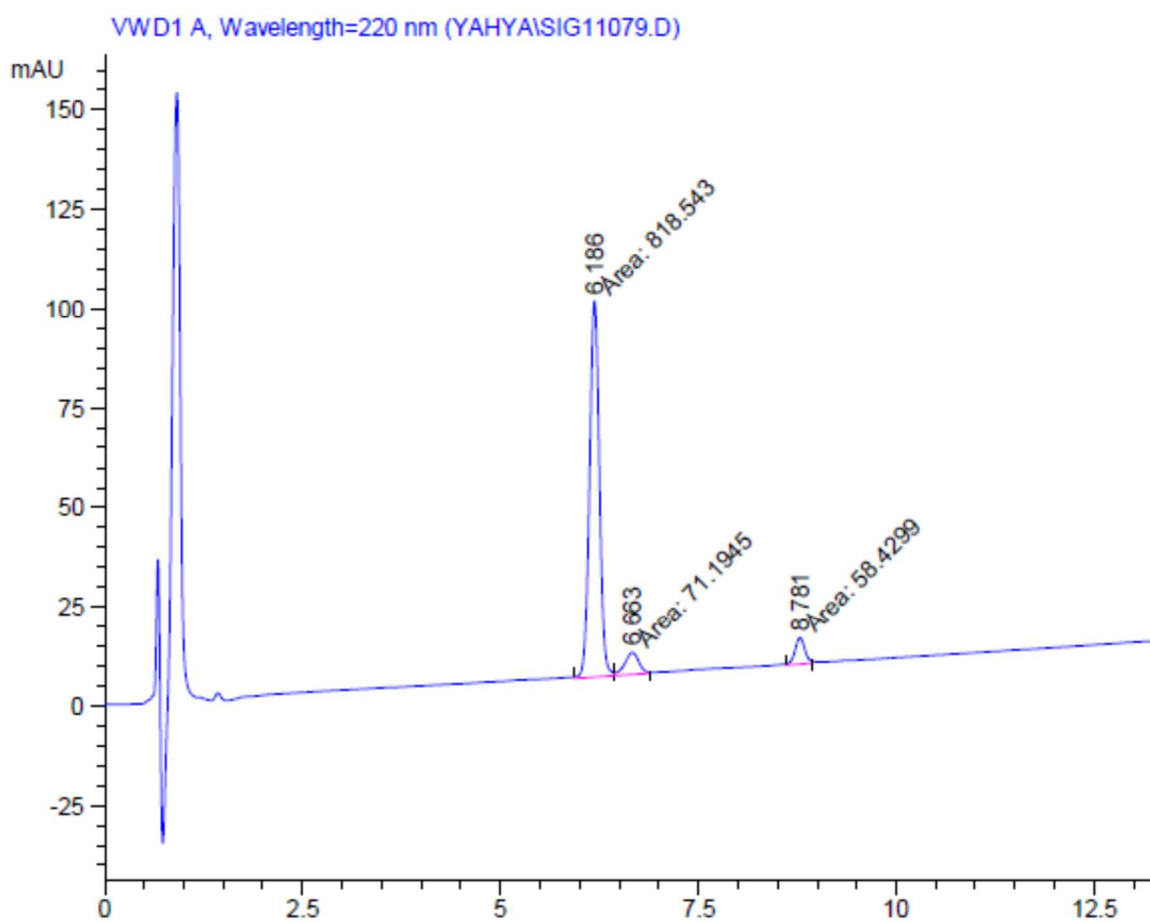

| Peak # | RetTime [min] | Type | Width [min] | Area mAU *s | Height [mAU] | Area %  |
|--------|---------------|------|-------------|-------------|--------------|---------|
| 1      | 6.186         | MF   | 0.1435      | 818.54346   | 95.06696     | 86.3290 |
| 2      | 6.663         | FM   | 0.2107      | 71.19449    | 5.63223      | 7.5086  |
| 3      | 8.781         | MM   | 0.1449      | 58.42990    | 6.71888      | 6.1624  |

Totals : 948.16784 107.41807

# 1.2- HOBt in ACN

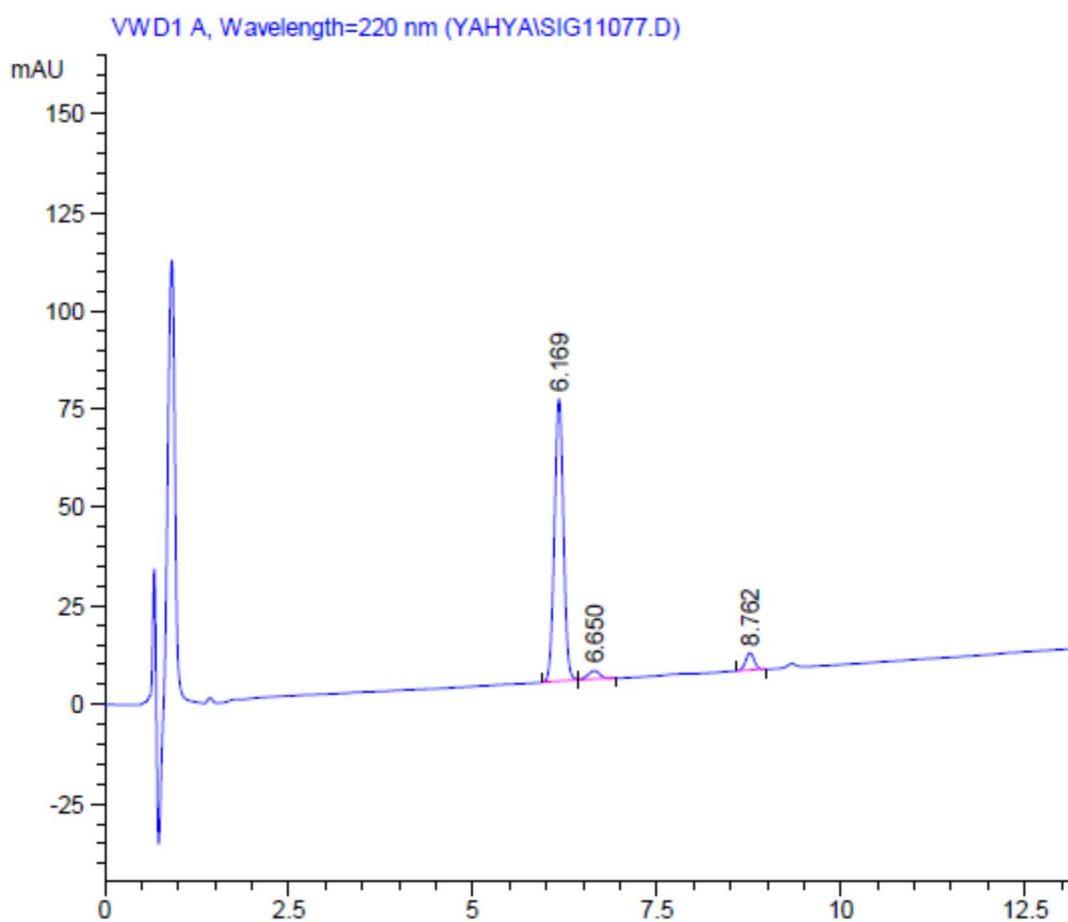

| Peak #   | RetTime [min] | Type | Width [min] | Area mAU *s | Height [mAU] | Area %  |
|----------|---------------|------|-------------|-------------|--------------|---------|
| 1        | 6.169         | BB   | 0.1328      | 612.57001   | 71.94768     | 90.6859 |
| 2        | 6.650         | BP   | 0.1825      | 26.65774    | 2.21760      | 3.9465  |
| 3        | 8.762         | BB   | 0.1287      | 36.25735    | 4.37463      | 5.3676  |
| Totals : |               |      |             | 675.48510   | 78.53990     |         |



# 1.4-HOAt in DMF

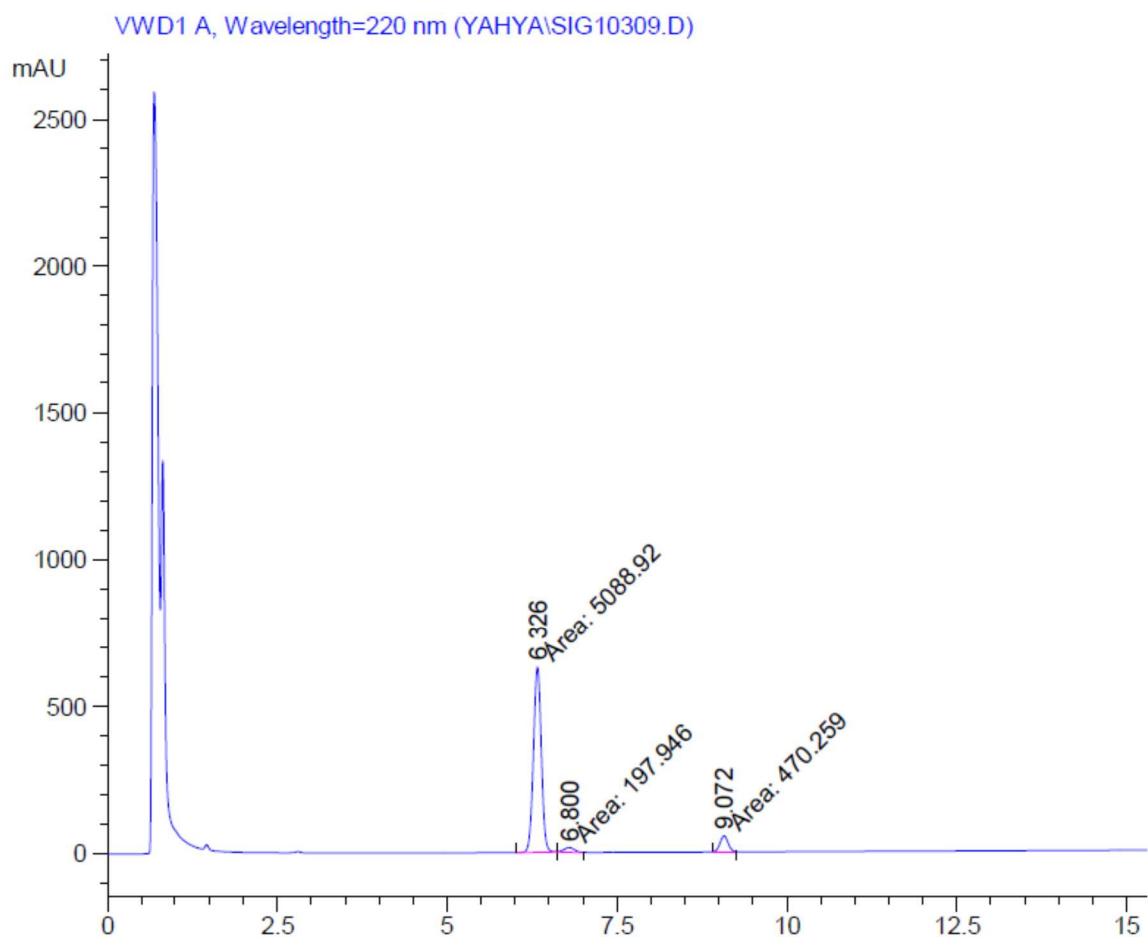

| Peak # | RetTime [min] | Type | Width [min] | Area mAU   | Height [mAU] | Area %  |
|--------|---------------|------|-------------|------------|--------------|---------|
| 1      | 6.326         | MM   | 0.1349      | 5088.91650 | 628.60004    | 88.3934 |
| 2      | 6.800         | MM   | 0.1974      | 197.94566  | 16.70938     | 3.4383  |
| 3      | 9.072         | MM   | 0.1427      | 470.25909  | 54.91633     | 8.1683  |

Totals : 5757.12126 700.22575

# 1.5-HOAt in THF

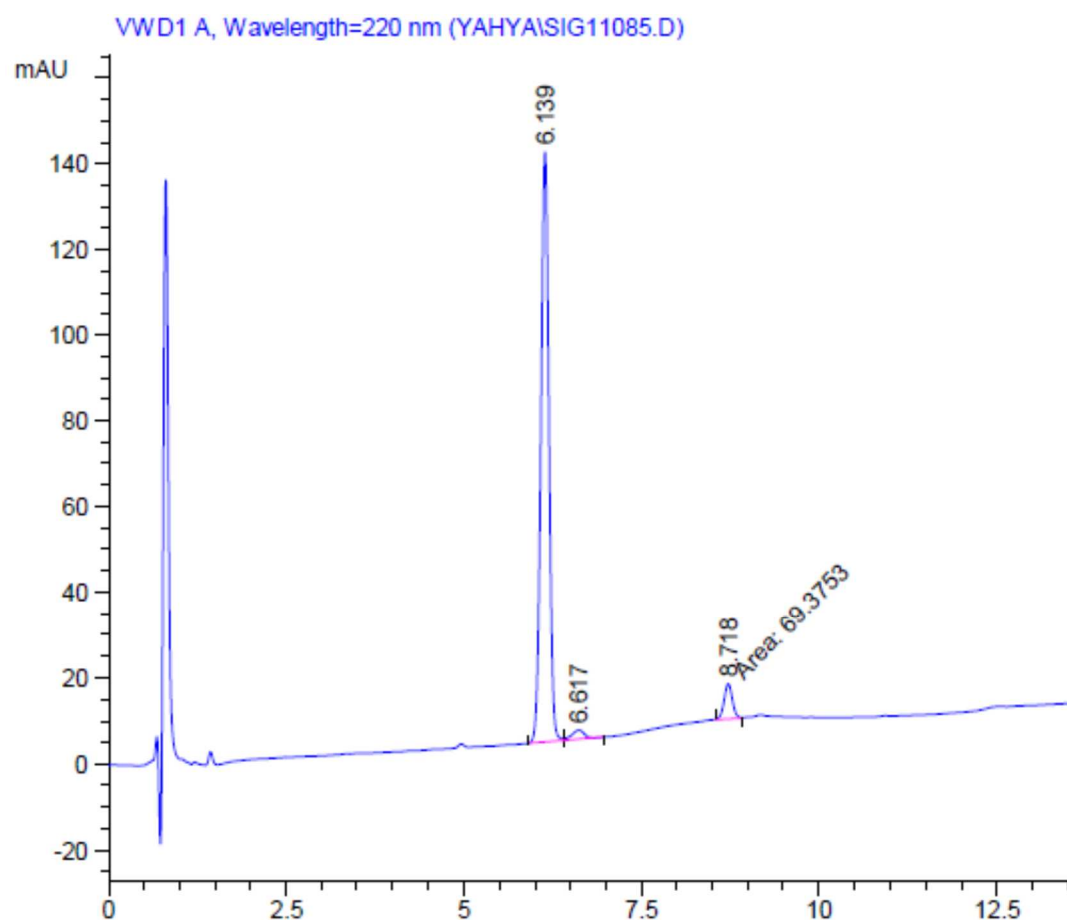

| Peak # | RetTime [min] | Type | Width [min] | Area mAU *s | Height [mAU] | Area %  |
|--------|---------------|------|-------------|-------------|--------------|---------|
| 1      | 6.139         | BB   | 0.1216      | 1074.28430  | 137.72717    | 91.9310 |
| 2      | 6.617         | BP   | 0.1844      | 24.91660    | 2.06585      | 2.1322  |
| 3      | 8.718         | MM   | 0.1395      | 69.37532    | 8.28620      | 5.9367  |

Totals : 1168.57622 148.07922

# 1.6-HOAt in ACN

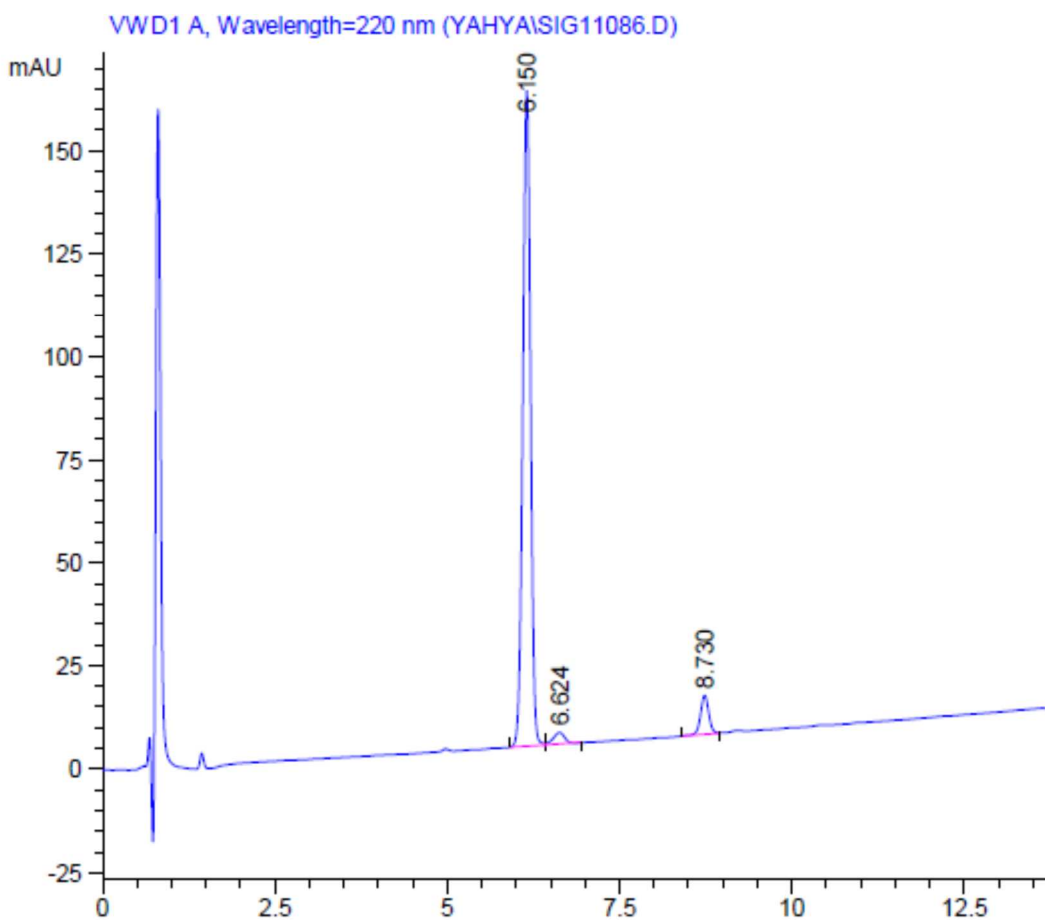

| Peak # | RetTime [min] | Type | Width [min] | Area mAU *s | Height [mAU] | Area %  |
|--------|---------------|------|-------------|-------------|--------------|---------|
| 1      | 6.150         | BB   | 0.1208      | 1229.13416  | 159.02092    | 91.6198 |
| 2      | 6.624         | BP   | 0.1798      | 33.10896    | 2.80707      | 2.4679  |
| 3      | 8.730         | BB   | 0.1306      | 79.31651    | 9.38959      | 5.9123  |

Totals : 1341.55962 171.21757

# 1.7-OxymaPure in DMF

VWD1 A, Wavelength=220 nm (YAHYA\SIG10942.D)

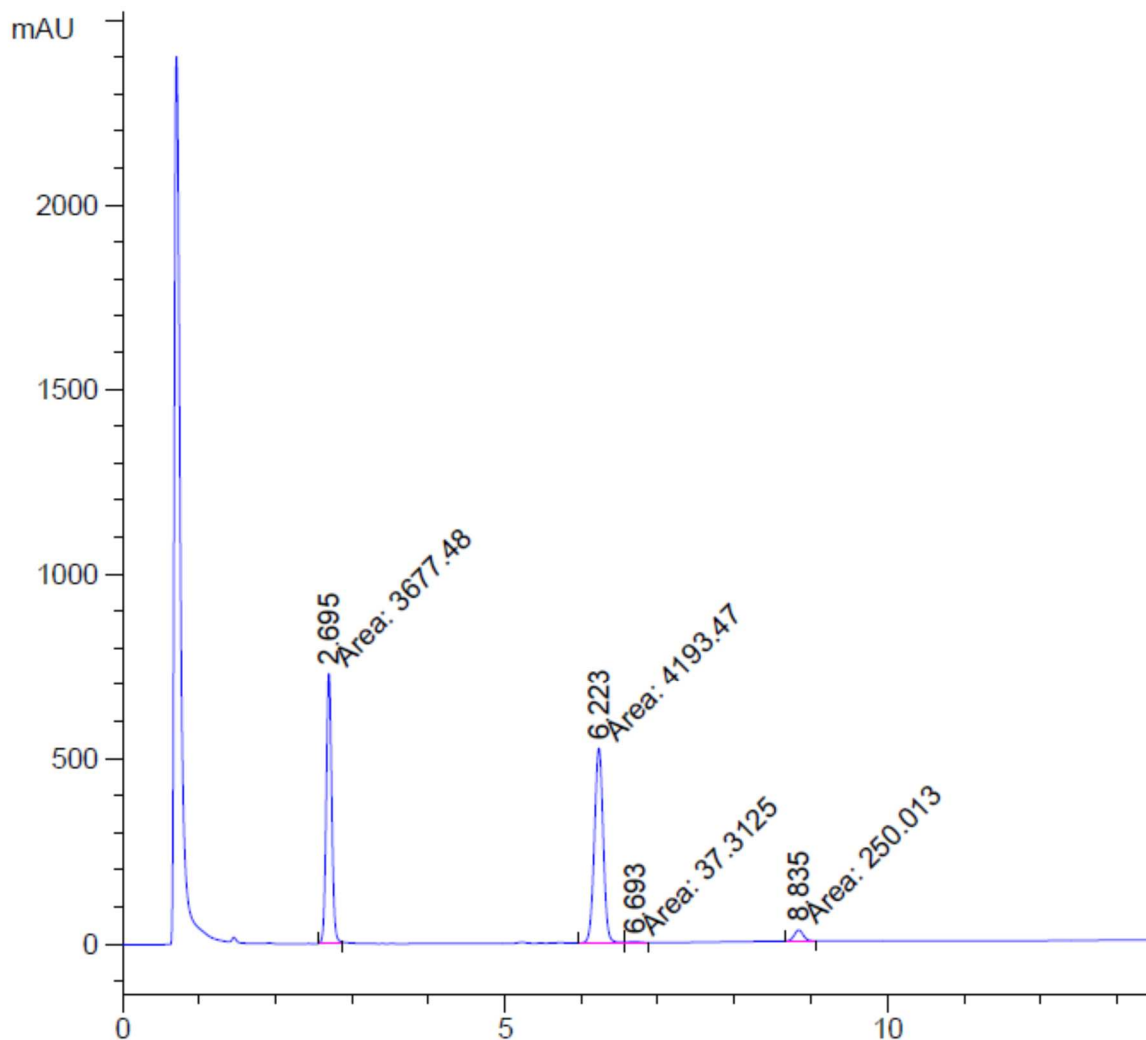

| Peak # | RetTime [min] | Type | Width [min] | Area mAU   | Height [mAU] | Area %  |
|--------|---------------|------|-------------|------------|--------------|---------|
| 1      | 2.695         | MM   | 0.0834      | 3677.48315 | 735.30951    | 45.0767 |
| 2      | 6.223         | MF   | 0.1329      | 4193.46582 | 525.72107    | 51.4014 |
| 3      | 6.693         | FM   | 0.2116      | 37.31252   | 2.93868      | 0.4574  |
| 4      | 8.835         | MM   | 0.1394      | 250.01295  | 29.89925     | 3.0645  |

Totals : 8158.27445 1293.86851

# 1.8-OxymaPure in THF

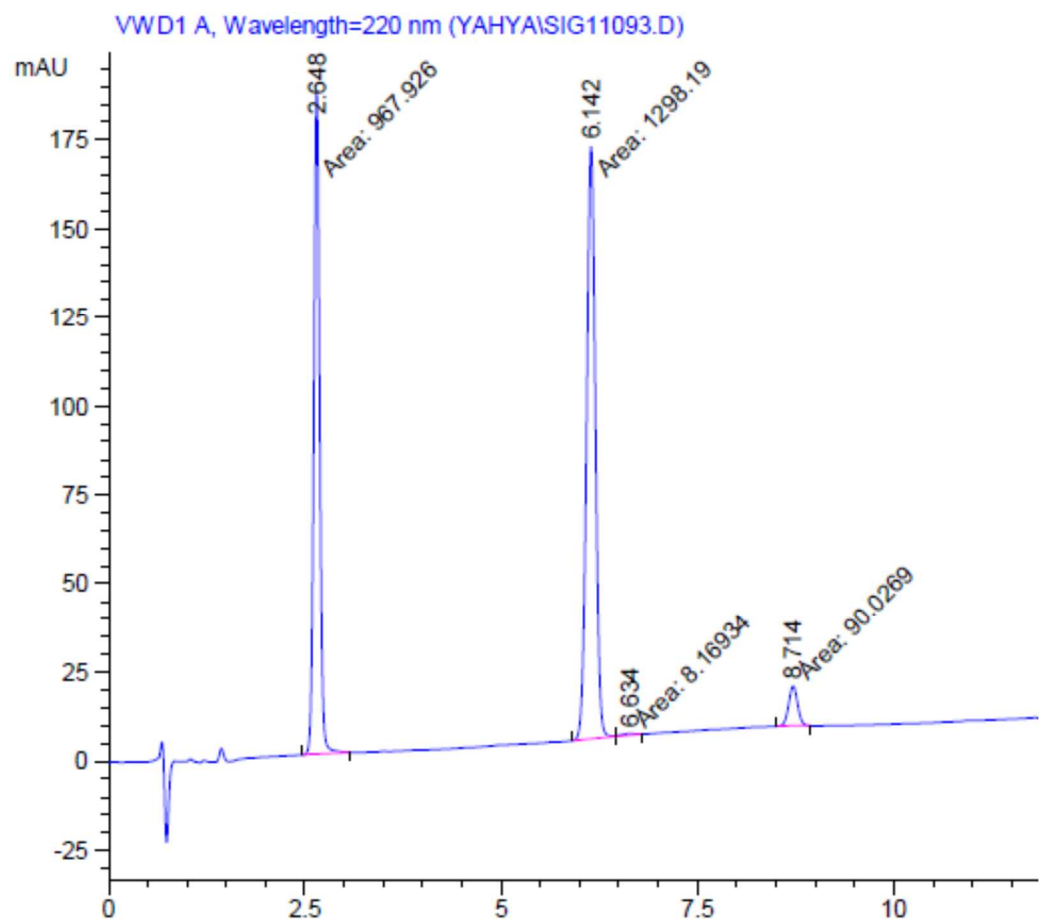

| Peak # | RetTime [min] | Type | Width [min] | Area mAU   | Height [mAU] | Area %  |
|--------|---------------|------|-------------|------------|--------------|---------|
| 1      | 2.648         | MM   | 0.0860      | 967.92639  | 187.50903    | 40.9390 |
| 2      | 6.142         | MF   | 0.1294      | 1298.19031 | 167.14500    | 54.9077 |
| 3      | 6.634         | FM   | 0.2187      | 8.16934    | 6.22477e-1   | 0.3455  |
| 4      | 8.714         | MM   | 0.1339      | 90.02687   | 11.20521     | 3.8077  |

Totals : 2364.31291 366.48172

# 1.9-OxymaPure in ACN

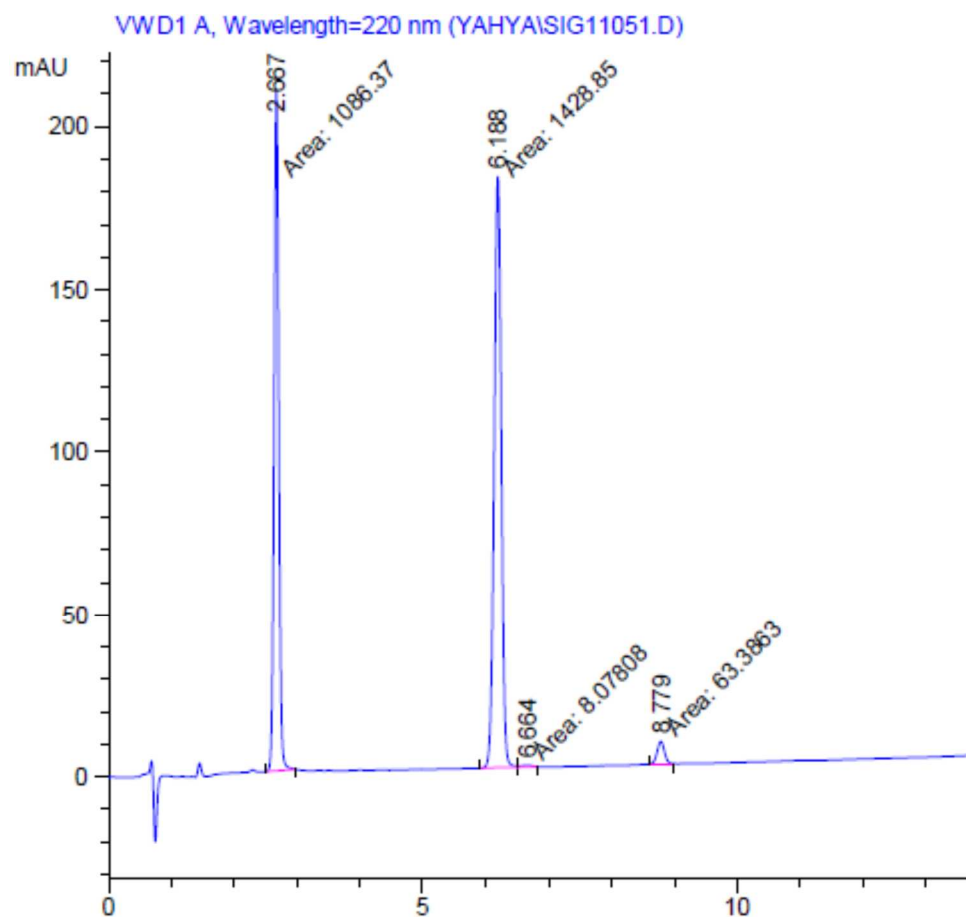

| Peak # | RetTime [min] | Type | Width [min] | Area mAU *s | Height [mAU] | Area %  |
|--------|---------------|------|-------------|-------------|--------------|---------|
| 1      | 2.667         | MM   | 0.0860      | 1086.37109  | 210.44673    | 41.9986 |
| 2      | 6.188         | MF   | 0.1305      | 1428.84729  | 182.46661    | 55.2386 |
| 3      | 6.664         | FM   | 0.2152      | 8.07808     | 6.25771e-1   | 0.3123  |
| 4      | 8.779         | MM   | 0.1456      | 63.38634    | 7.25517      | 2.4505  |

Totals : 2586.68281 400.79428

# 1.10-Oxyma-B in DMF

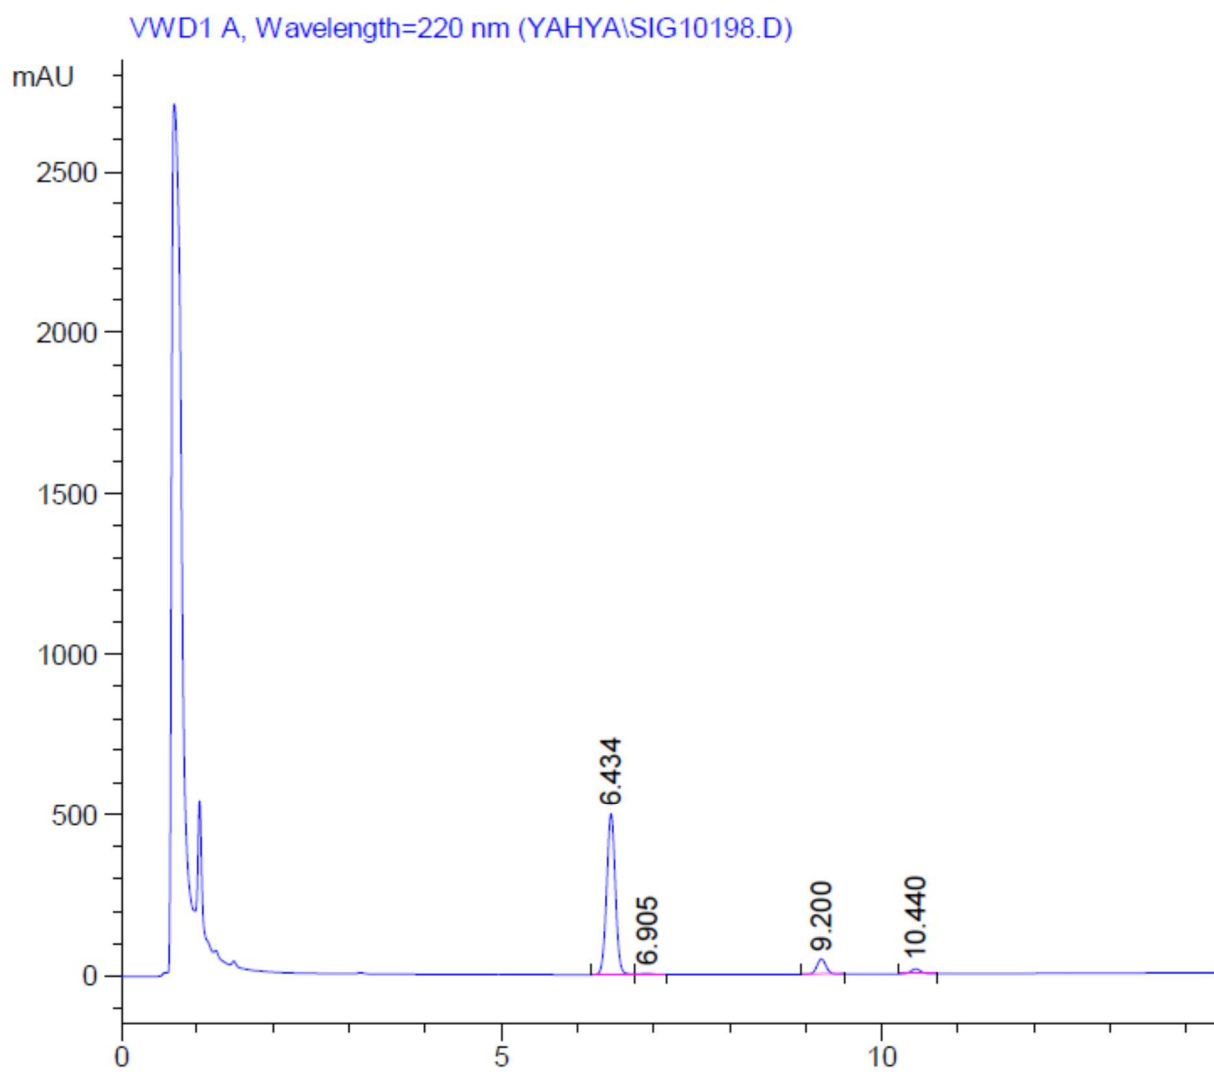

| Peak # | RetTime [min] | Type | Width [min] | Area mAU *s | Height [mAU] | Area %  |
|--------|---------------|------|-------------|-------------|--------------|---------|
| 1      | 6.434         | PV   | 0.1222      | 3953.95679  | 495.56058    | 87.3388 |
| 2      | 6.905         | VV   | 0.1890      | 40.04154    | 3.15152      | 0.8845  |
| 3      | 9.200         | BB   | 0.1298      | 394.05420   | 47.02825     | 8.7042  |
| 4      | 10.440        | BB   | 0.1418      | 139.09808   | 15.18406     | 3.0725  |

Totals : 4527.15061 560.92440

# 1.11-Oxyma-B in THF

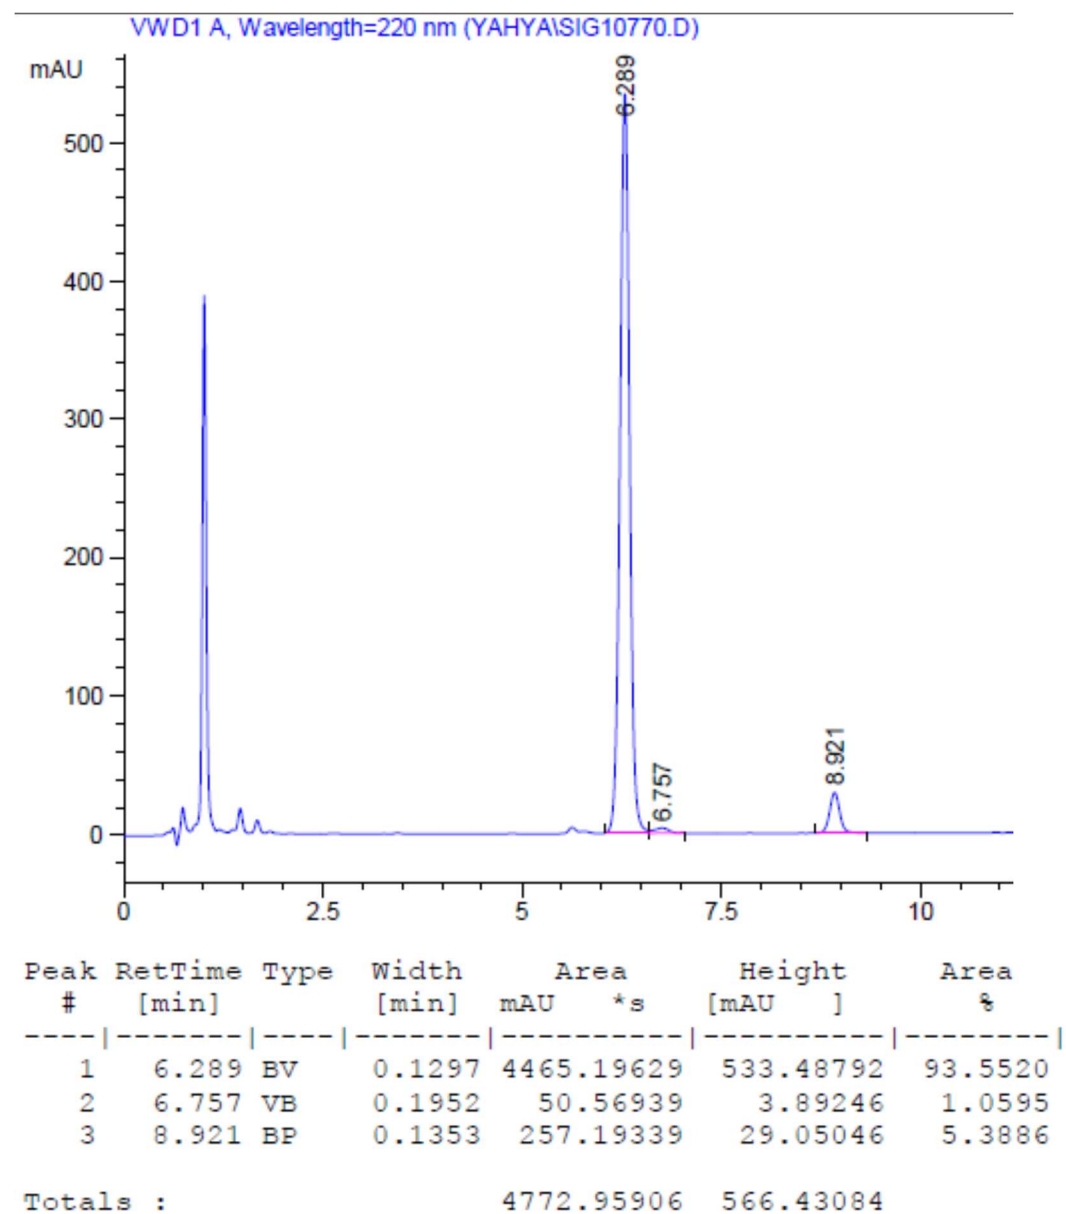



# 1.12-Oxyma-B in ACN

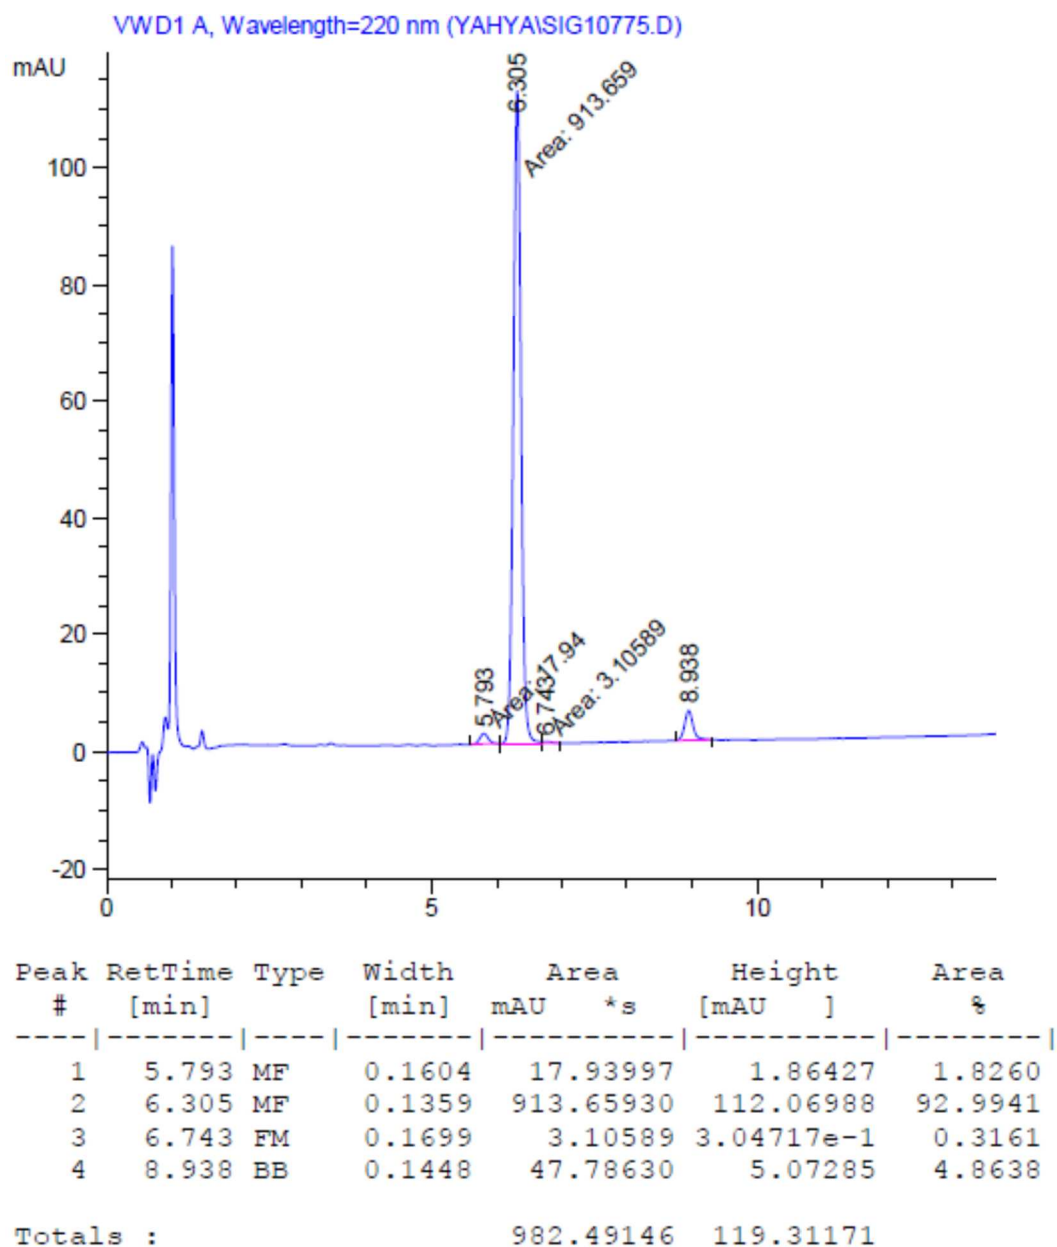

## 2-Z-Phe-Val-Pro-NH<sub>2</sub> Racemization test:

### 2.1- HOBt in DMF

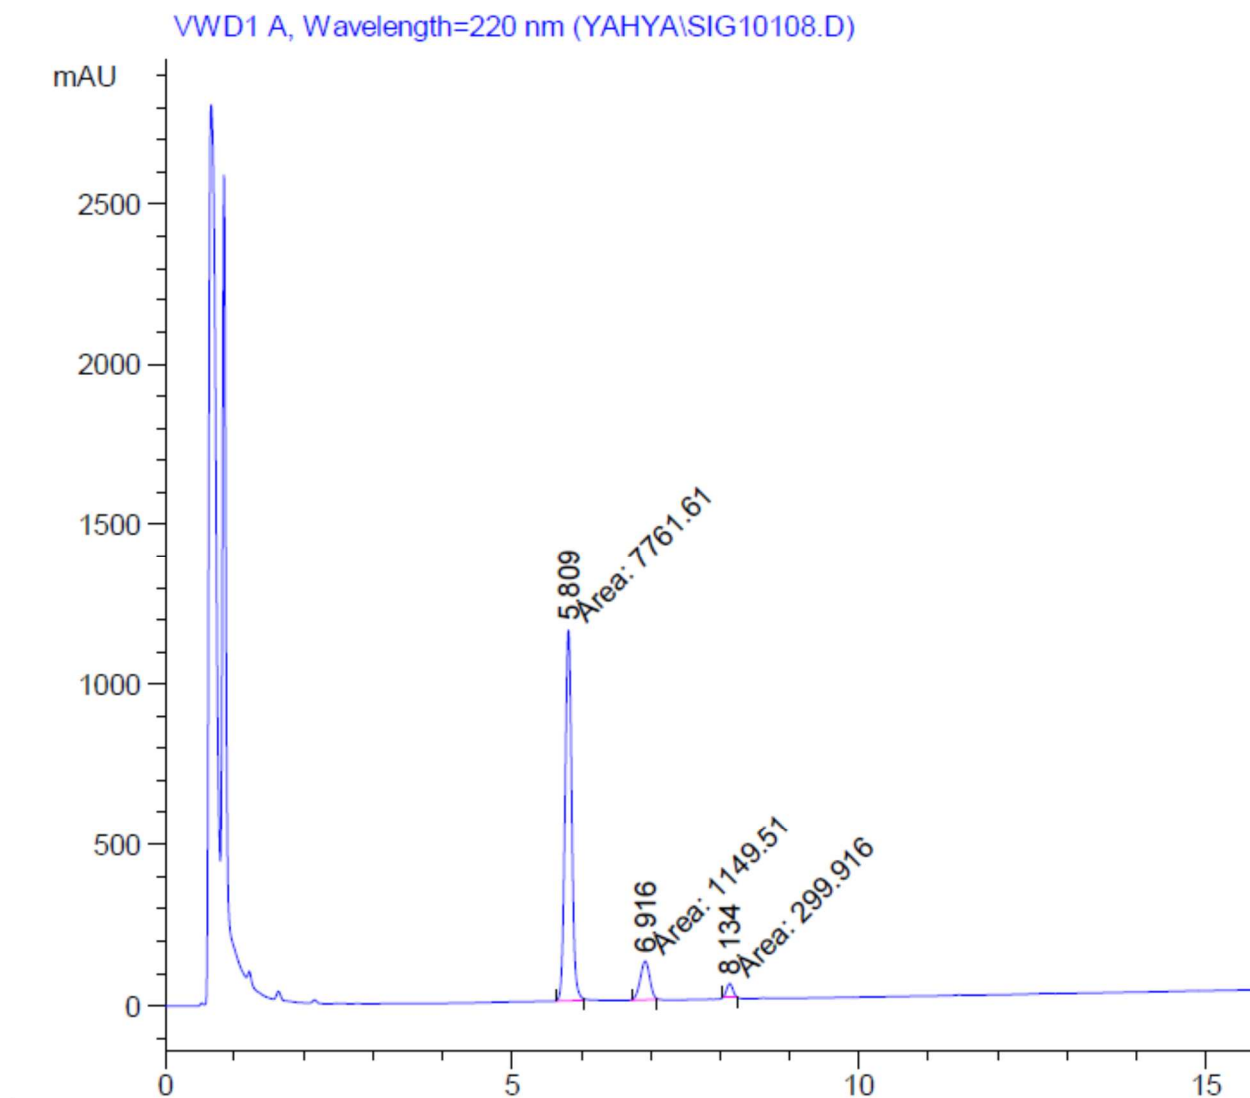

| Peak # | RetTime [min] | Type | Width [min] | Area mAU   | Height [mAU] | Area %  |
|--------|---------------|------|-------------|------------|--------------|---------|
| 1      | 5.809         | MM   | 0.1118      | 7761.60791 | 1156.86853   | 84.2642 |
| 2      | 6.916         | MM   | 0.1590      | 1149.51404 | 120.45636    | 12.4797 |
| 3      | 8.134         | MM   | 0.1096      | 299.91574  | 45.59239     | 3.2560  |

Totals : 9211.03769 1322.91728

## 2.2- HOBt in THF

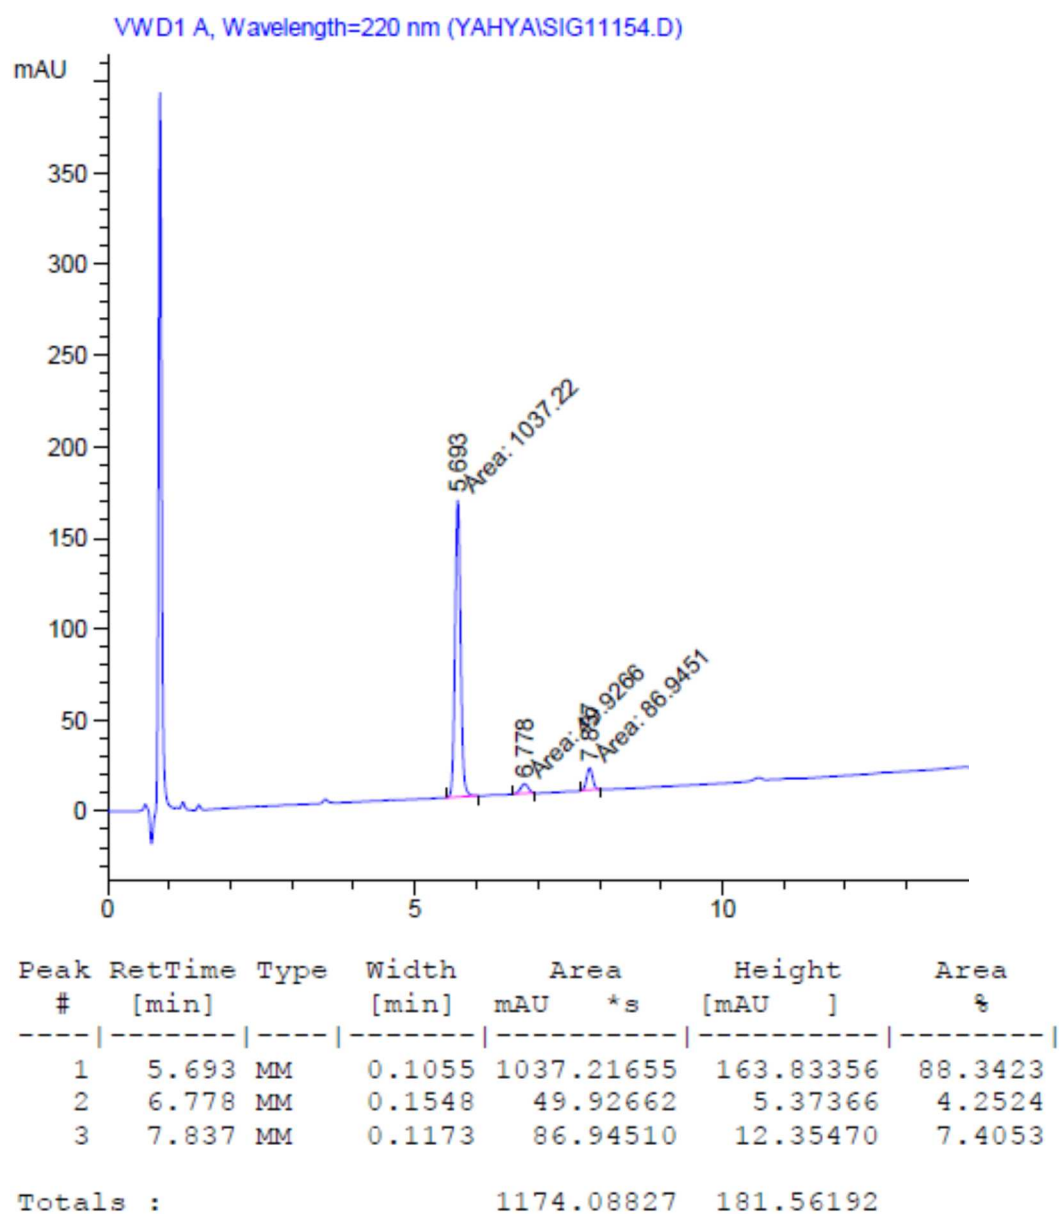

## 2.3- HOBt in ACN

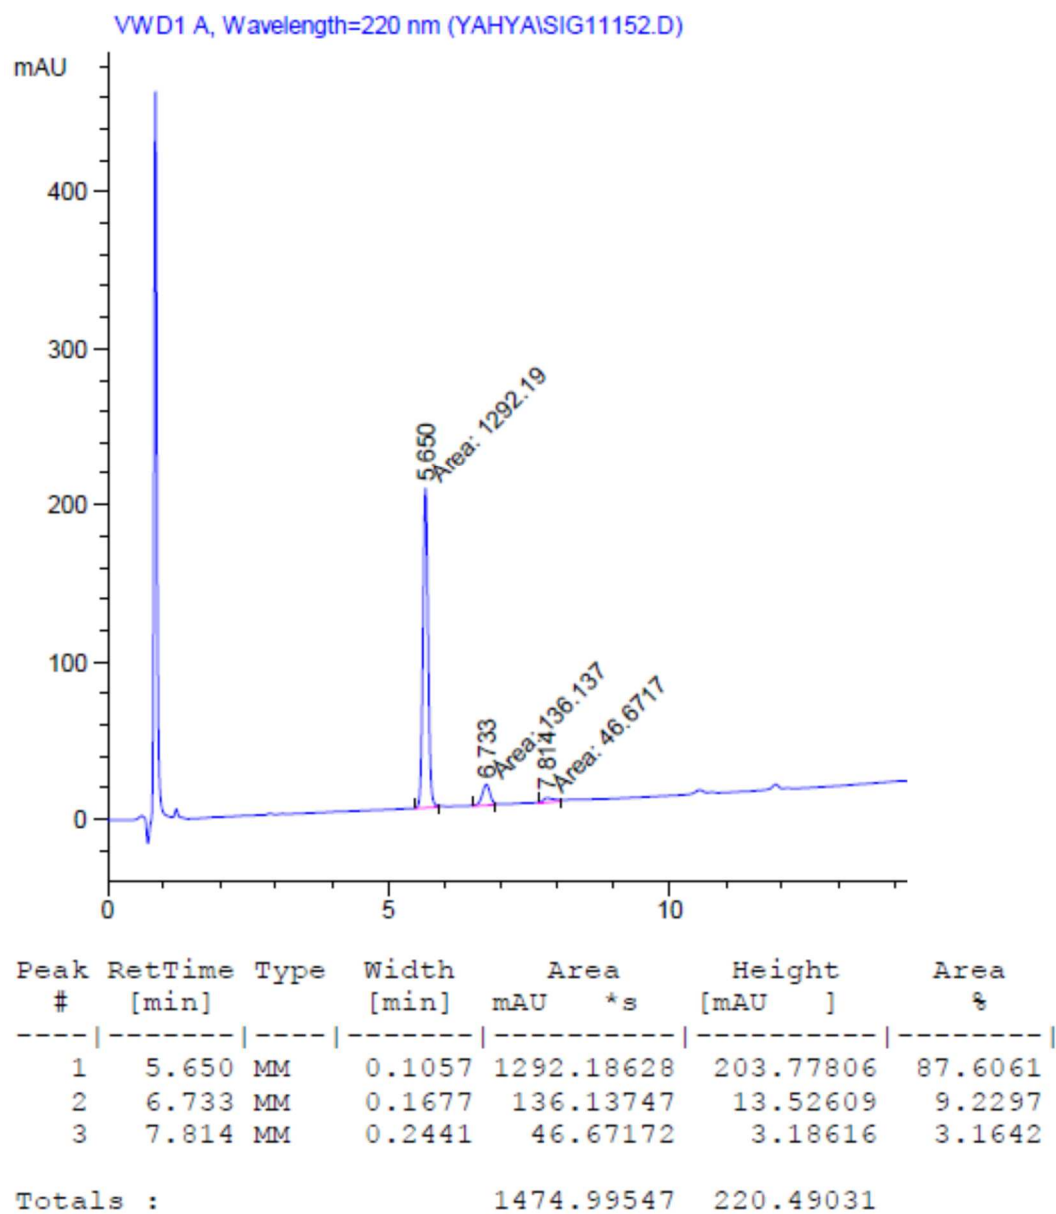

## 2.4-HOAt in DMF

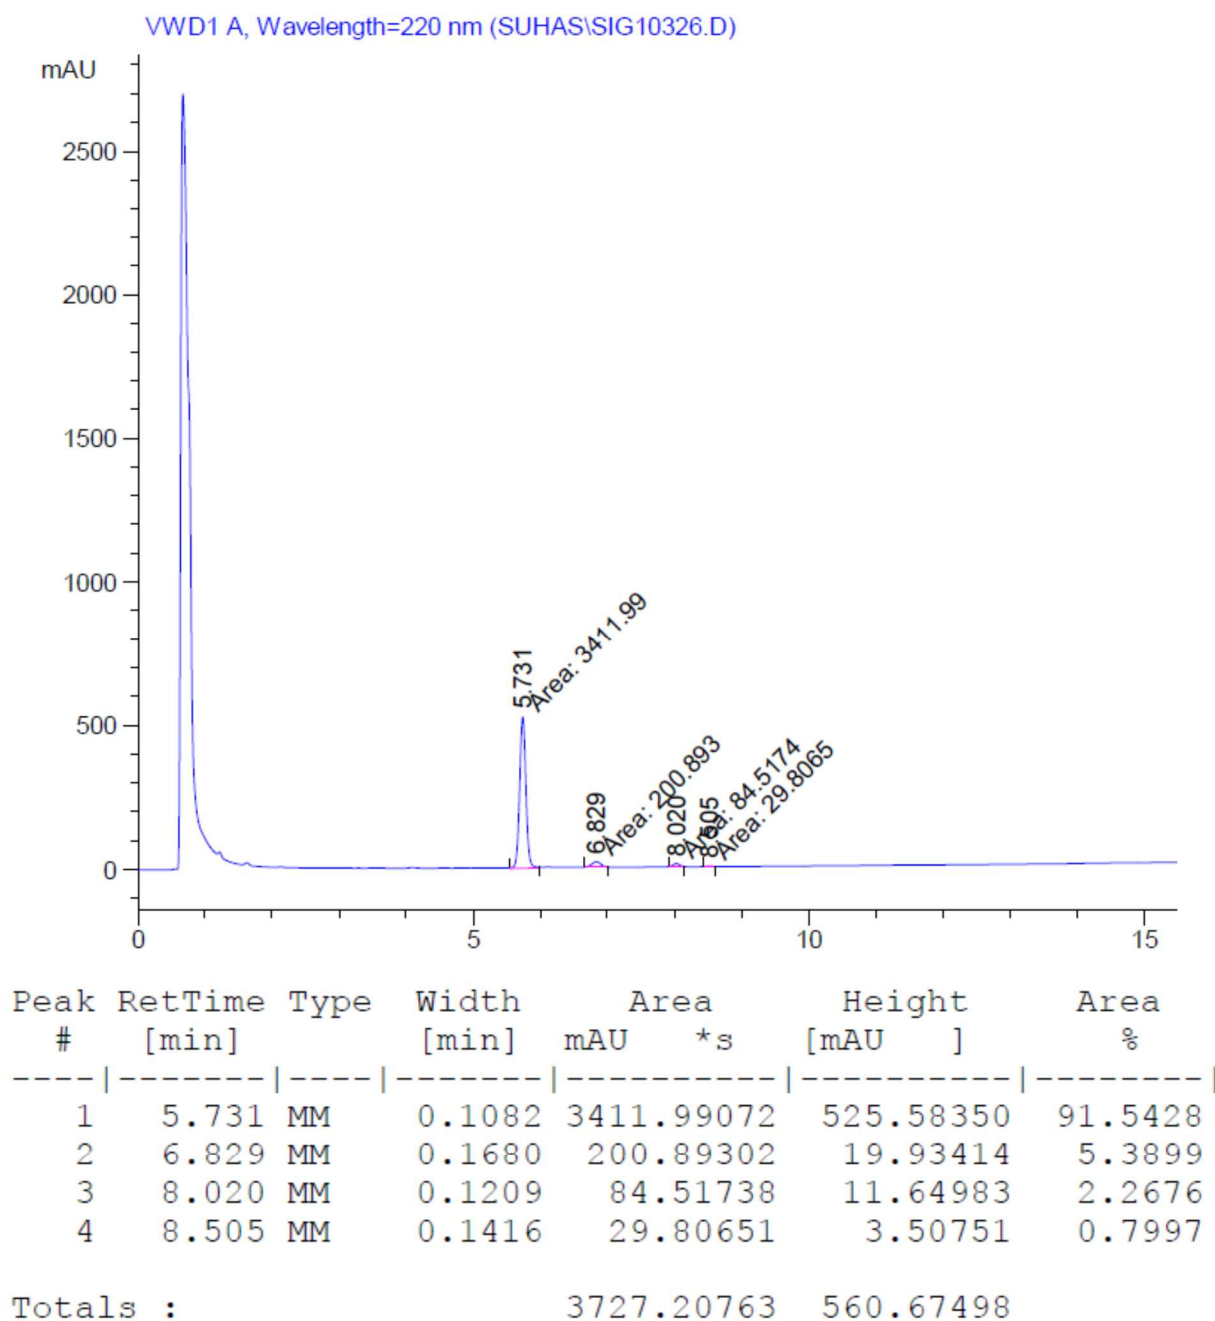

# 2.5-HOAt in THF

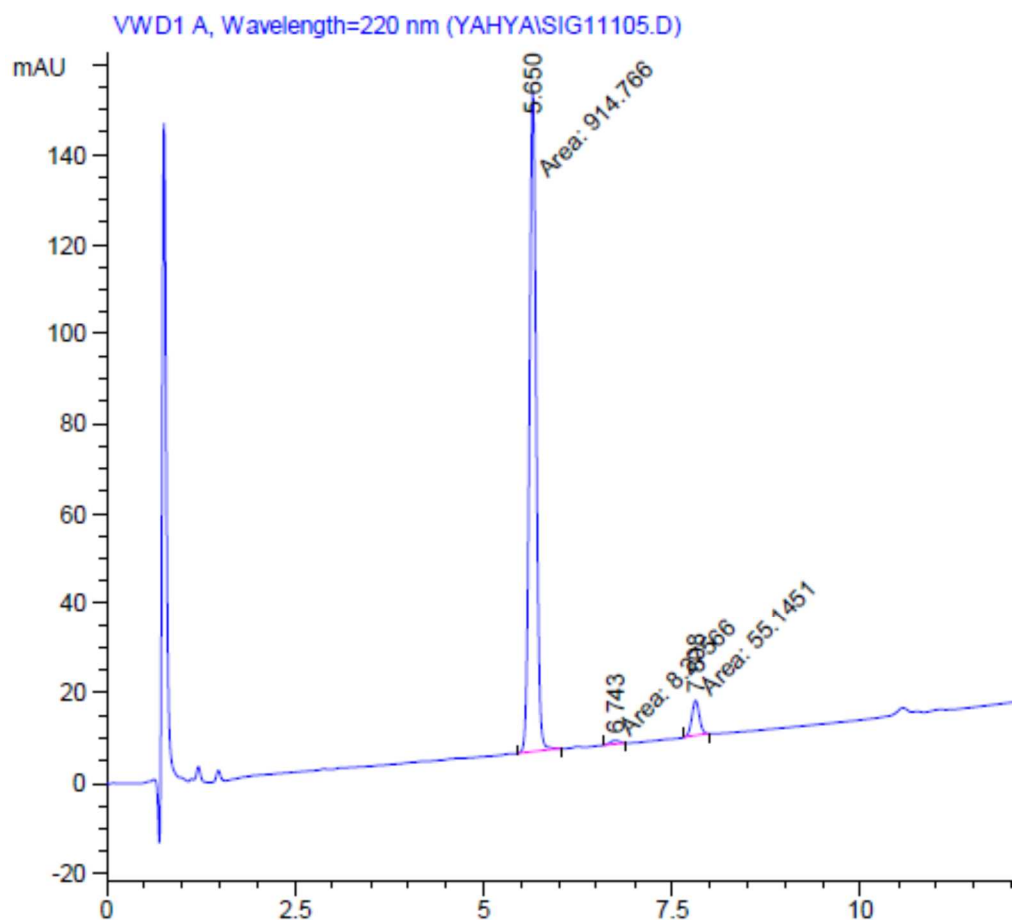

| Peak # | RetTime [min] | Type | Width [min] | Area mAU *s | Height [mAU] | Area %  |
|--------|---------------|------|-------------|-------------|--------------|---------|
| 1      | 5.650         | MM   | 0.1035      | 914.76642   | 147.32126    | 93.5165 |
| 2      | 6.743         | MM   | 0.1553      | 8.27566     | 8.87914e-1   | 0.8460  |
| 3      | 7.808         | MM   | 0.1172      | 55.14510    | 7.83931      | 5.6375  |

Totals : 978.18717 156.04848

## 2.6-HOAt in ACN

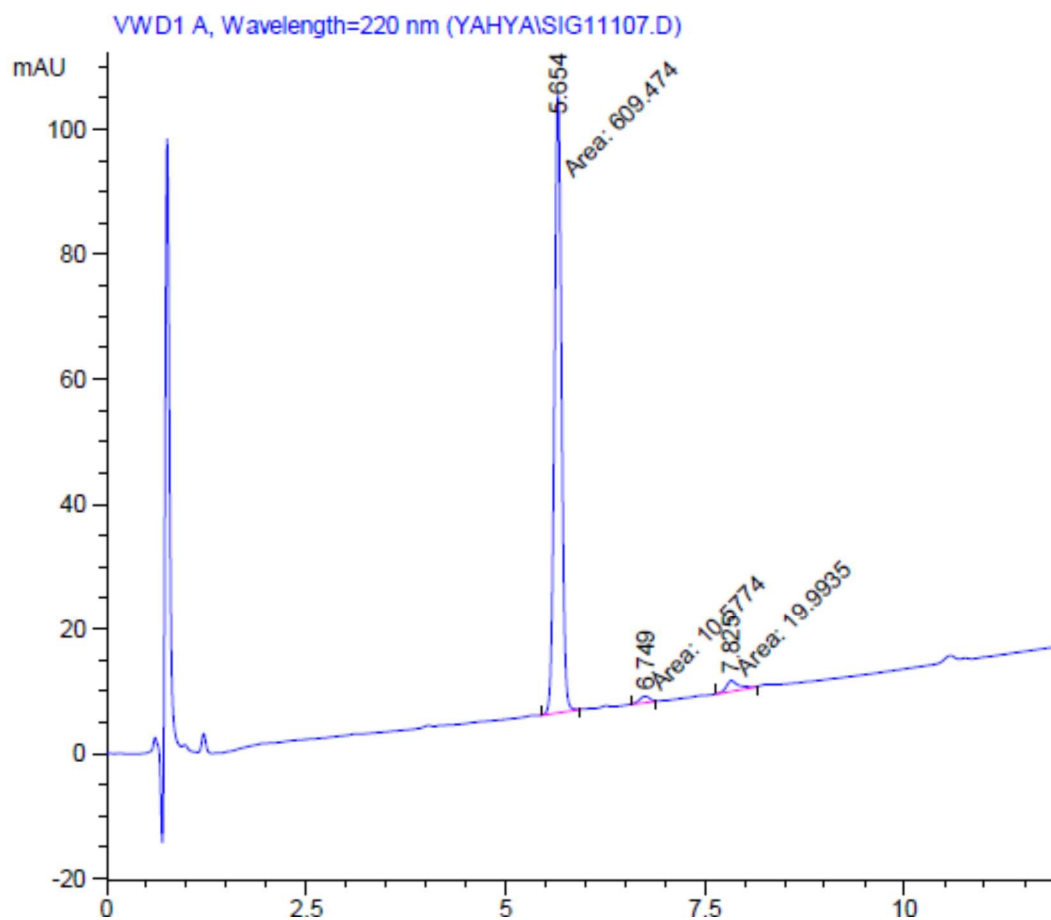

| Peak # | RetTime [min] | Type | Width [min] | Area mAU *s | Height [mAU] | Area %  |
|--------|---------------|------|-------------|-------------|--------------|---------|
| 1      | 5.654         | MM   | 0.1023      | 609.47351   | 99.31754     | 95.2236 |
| 2      | 6.749         | MM   | 0.1609      | 10.57745    | 1.09575      | 1.6526  |
| 3      | 7.825         | MM   | 0.1868      | 19.99349    | 1.78424      | 3.1238  |

Totals : 640.04445 102.19752

## 2.7-OxymaPure in DMF

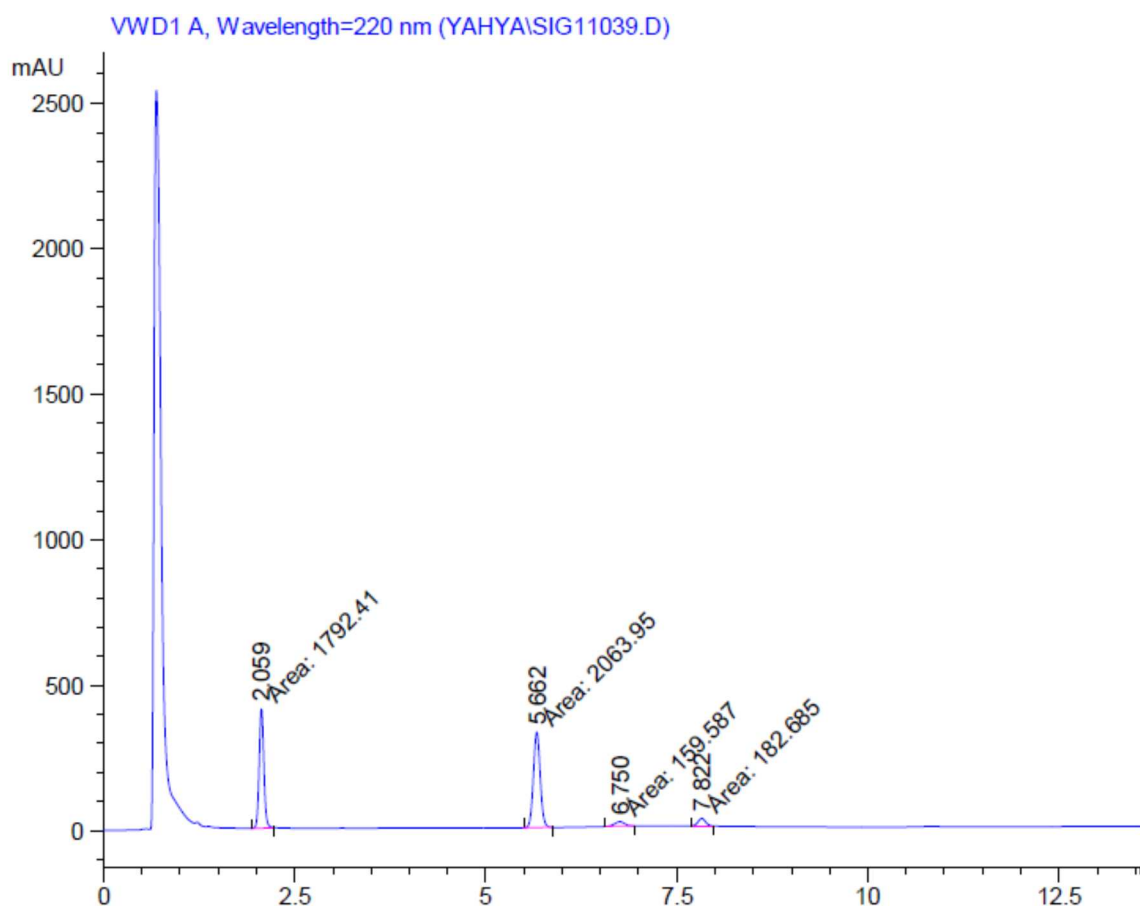

| Peak # | RetTime [min] | Type | Width [min] | Area mAU   | Height [mAU] | Area %  |
|--------|---------------|------|-------------|------------|--------------|---------|
| 1      | 2.059         | MM   | 0.0720      | 1792.40674 | 414.90189    | 42.6902 |
| 2      | 5.662         | MM   | 0.1045      | 2063.95459 | 329.12589    | 49.1578 |
| 3      | 6.750         | MM   | 0.1629      | 159.58696  | 16.32829     | 3.8009  |
| 4      | 7.822         | MM   | 0.1162      | 182.68468  | 26.21371     | 4.3511  |

Totals : 4198.63297 786.56978



## 2.8-OxymaPure in THF

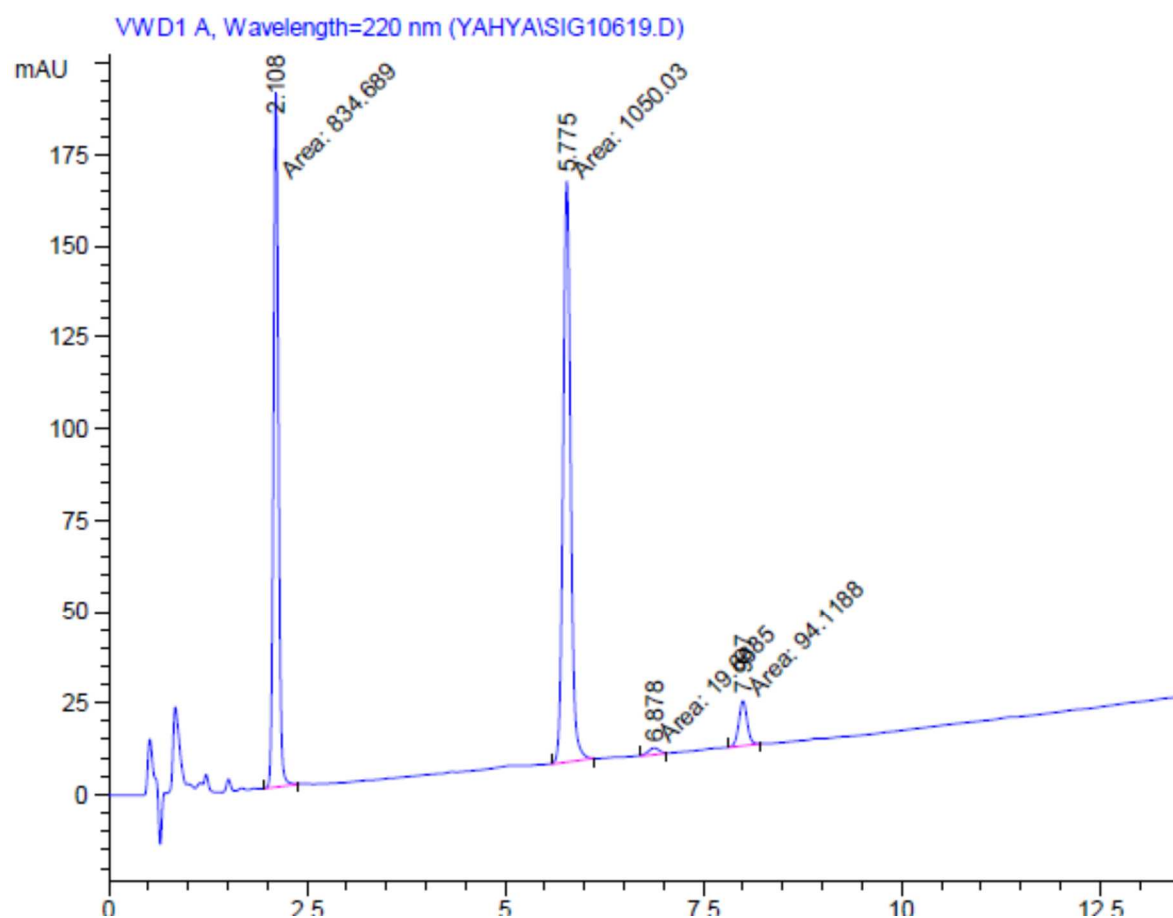

| Peak # | RetTime [min] | Type | Width [min] | Area mAU *s | Height [mAU] | Area %  |
|--------|---------------|------|-------------|-------------|--------------|---------|
| 1      | 2.108         | MM   | 0.0727      | 834.68903   | 191.41022    | 41.7656 |
| 2      | 5.775         | MM   | 0.1097      | 1050.03101  | 159.54111    | 52.5408 |
| 3      | 6.878         | MM   | 0.1721      | 19.66851    | 1.90459      | 0.9842  |
| 4      | 7.997         | MM   | 0.1266      | 94.11881    | 12.38939     | 4.7095  |

Totals : 1998.50736 365.24531

## 2.9-OxymaPure in ACN

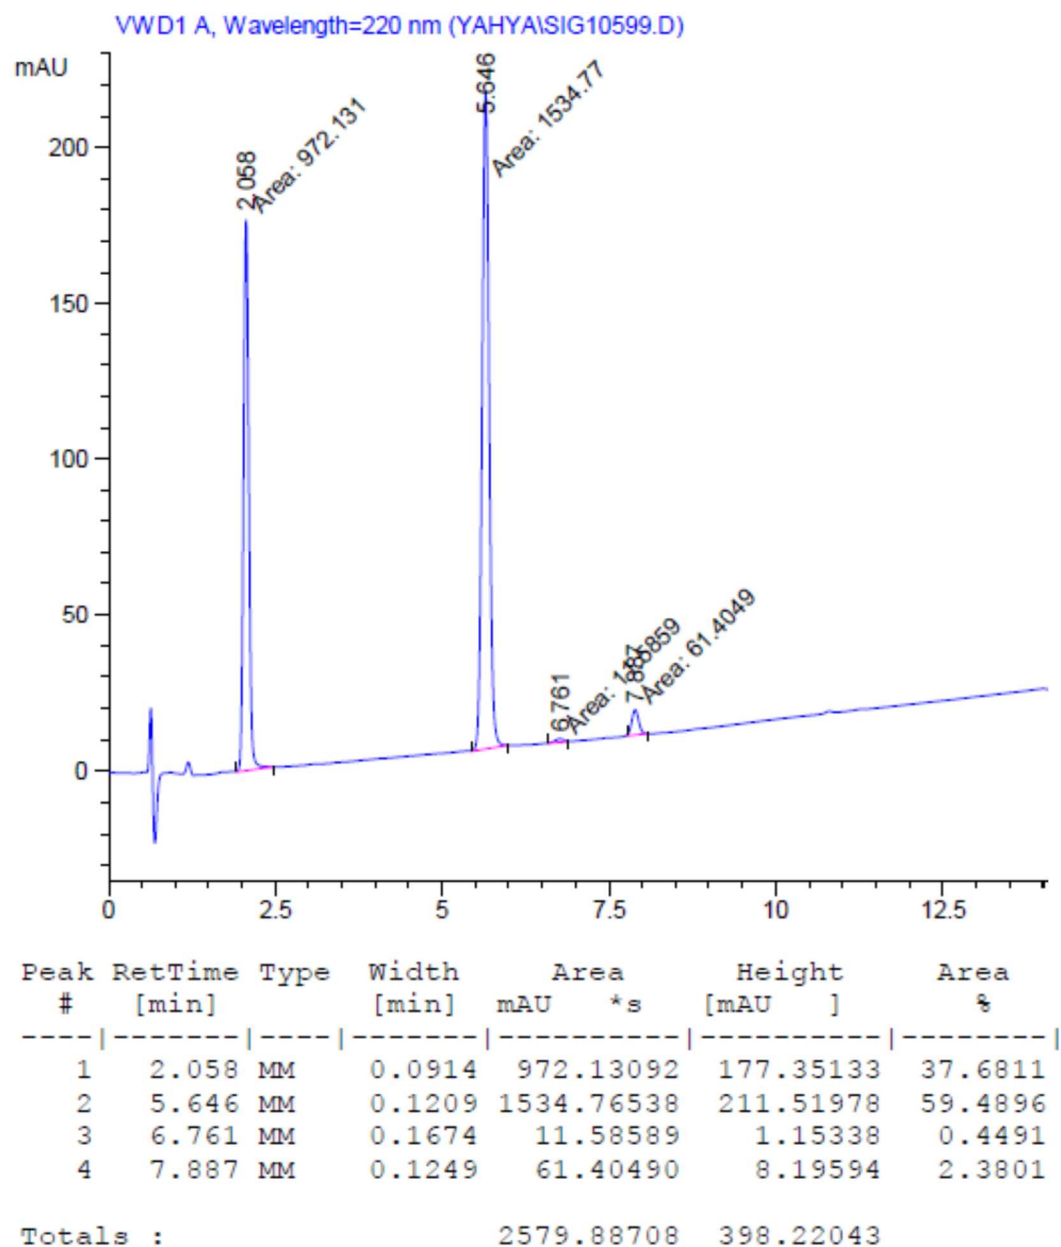

## 2.10-Oxyma-B in DMF

VWD1 A, Wavelength=220 nm (YAHYA\SIG10109.D)

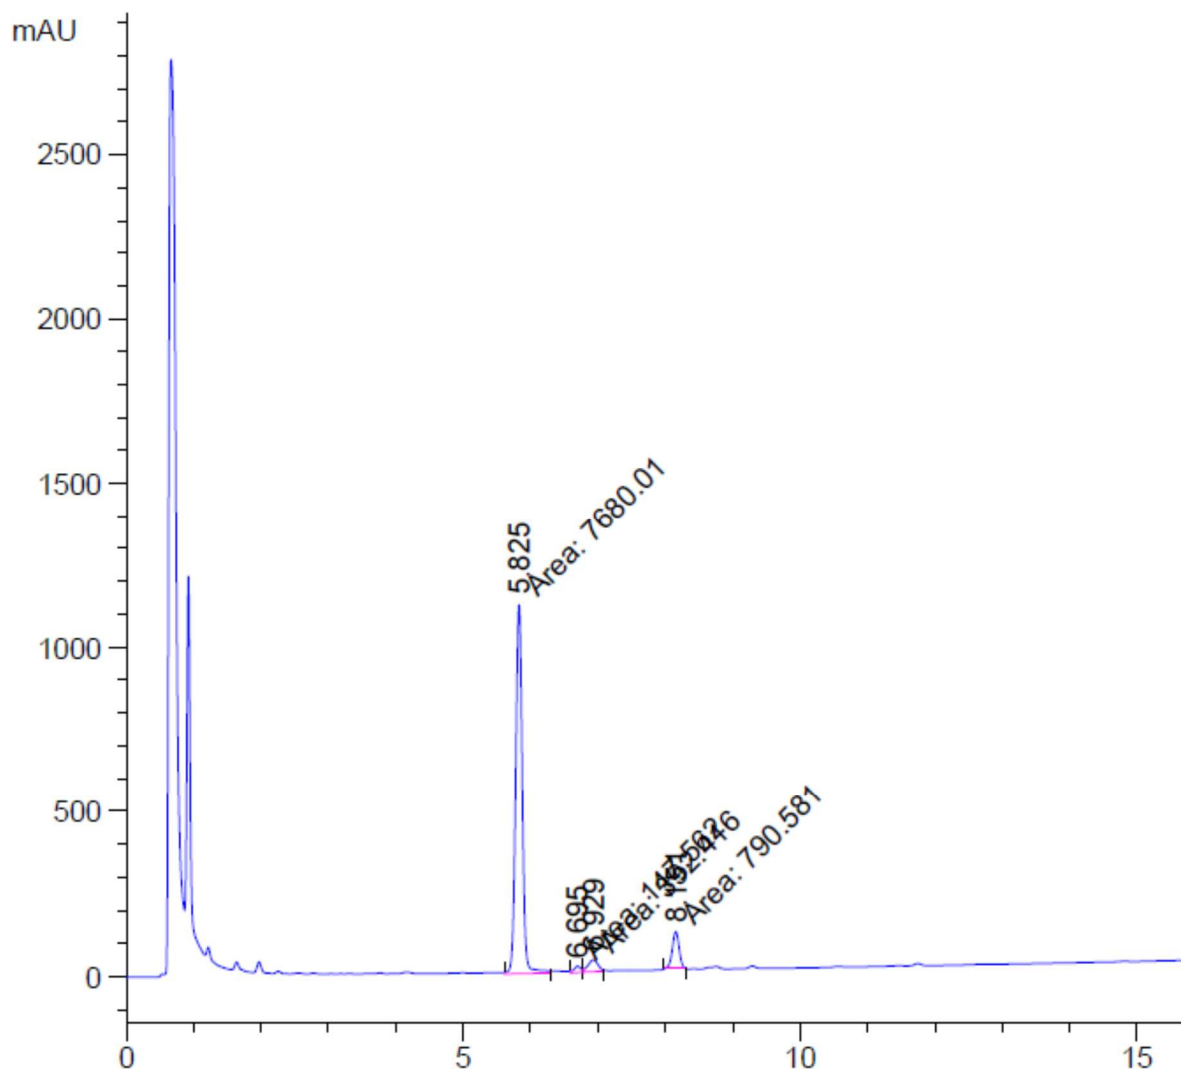

| Peak # | RetTime [min] | Type | Width [min] | Area mAU   | Height [mAU] | Area %  |
|--------|---------------|------|-------------|------------|--------------|---------|
| 1      | 5.825         | MM   | 0.1138      | 7680.01074 | 1124.86694   | 85.2334 |
| 2      | 6.695         | MF   | 0.1221      | 147.56154  | 20.13989     | 1.6376  |
| 3      | 6.929         | FM   | 0.1768      | 392.41583  | 36.99476     | 4.3551  |
| 4      | 8.151         | MM   | 0.1176      | 790.58063  | 112.03448    | 8.7739  |

Totals : 9010.56874 1294.03608

## 2.11- Oxyma-B in THF

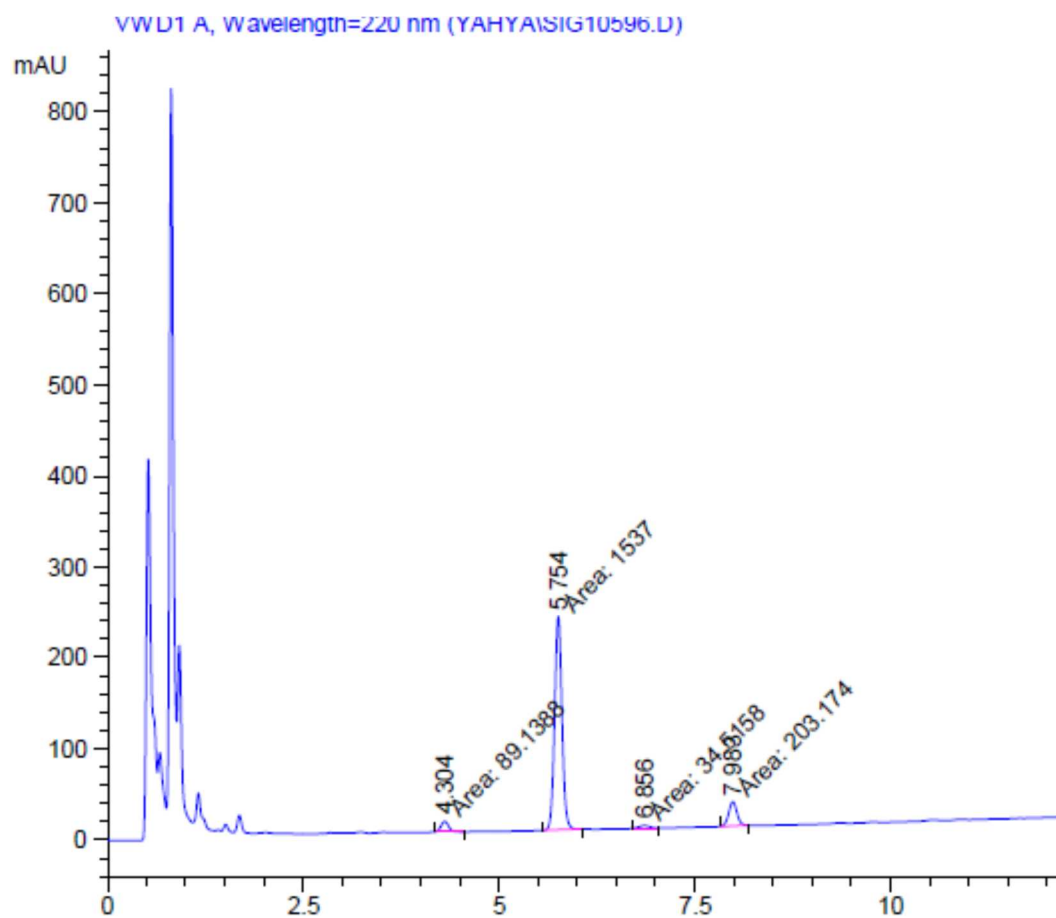

| Peak # | RetTime [min] | Type | Width [min] | Area mAU   | Height [mAU] | Area %  |
|--------|---------------|------|-------------|------------|--------------|---------|
| 1      | 4.304         | MM   | 0.1249      | 89.13880   | 11.89540     | 4.7826  |
| 2      | 5.754         | MM   | 0.1094      | 1536.99585 | 234.20184    | 82.4646 |
| 3      | 6.856         | MM   | 0.1735      | 34.51583   | 3.31647      | 1.8519  |
| 4      | 7.983         | MM   | 0.1261      | 203.17403  | 26.85485     | 10.9009 |

Totals : 1863.82451 276.26856

## 2.12- Oxyma-B in ACN

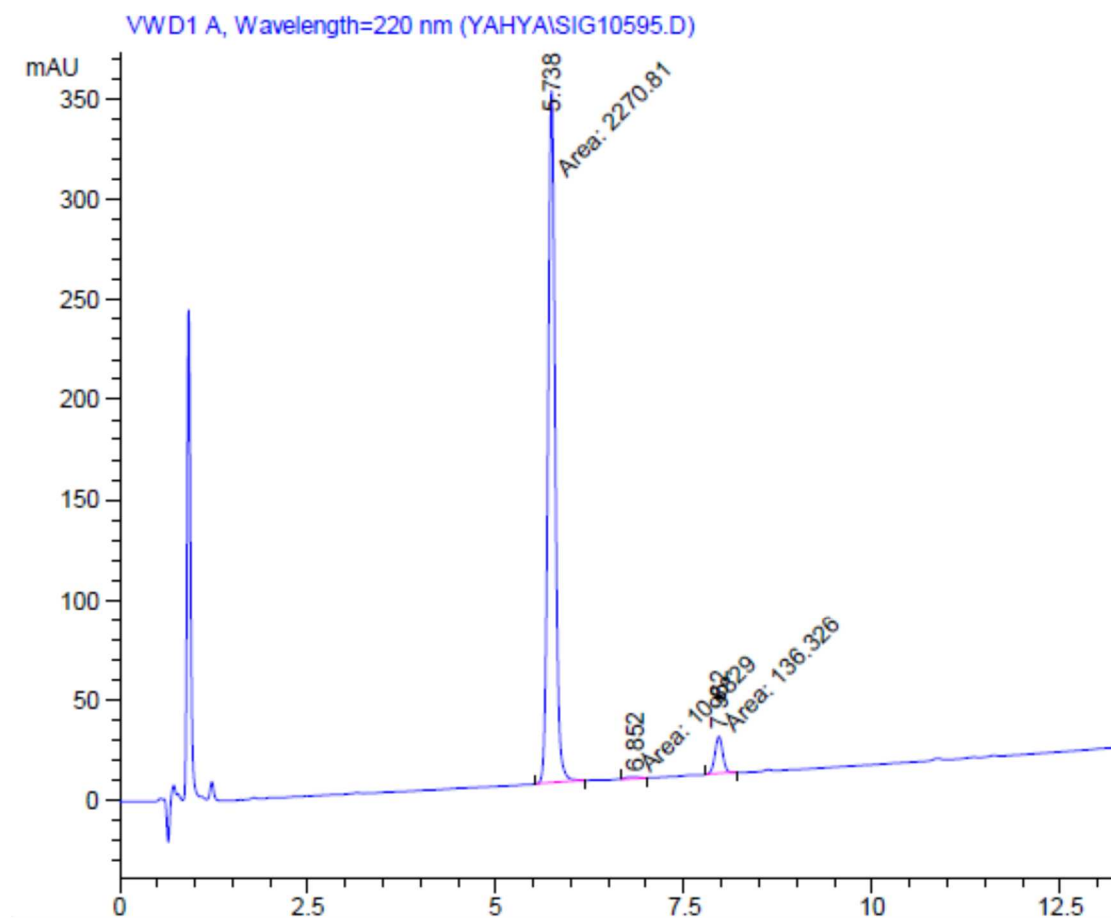

| Peak # | RetTime [min] | Type | Width [min] | Area mAU   | Area *s | Height [mAU] | Area %  |
|--------|---------------|------|-------------|------------|---------|--------------|---------|
| 1      | 5.738         | MM   | 0.1092      | 2270.80737 |         | 346.43256    | 93.9120 |
| 2      | 6.852         | MM   | 0.2469      | 10.88295   |         | 7.34594e-1   | 0.4501  |
| 3      | 7.962         | MM   | 0.1218      | 136.32571  |         | 18.65207     | 5.6379  |

Totals : 2418.01604 365.81922

### 3- H-Gly-Ser-Phe-NH<sub>2</sub> racemization Experiments

#### 3.1-HOBt in DMF

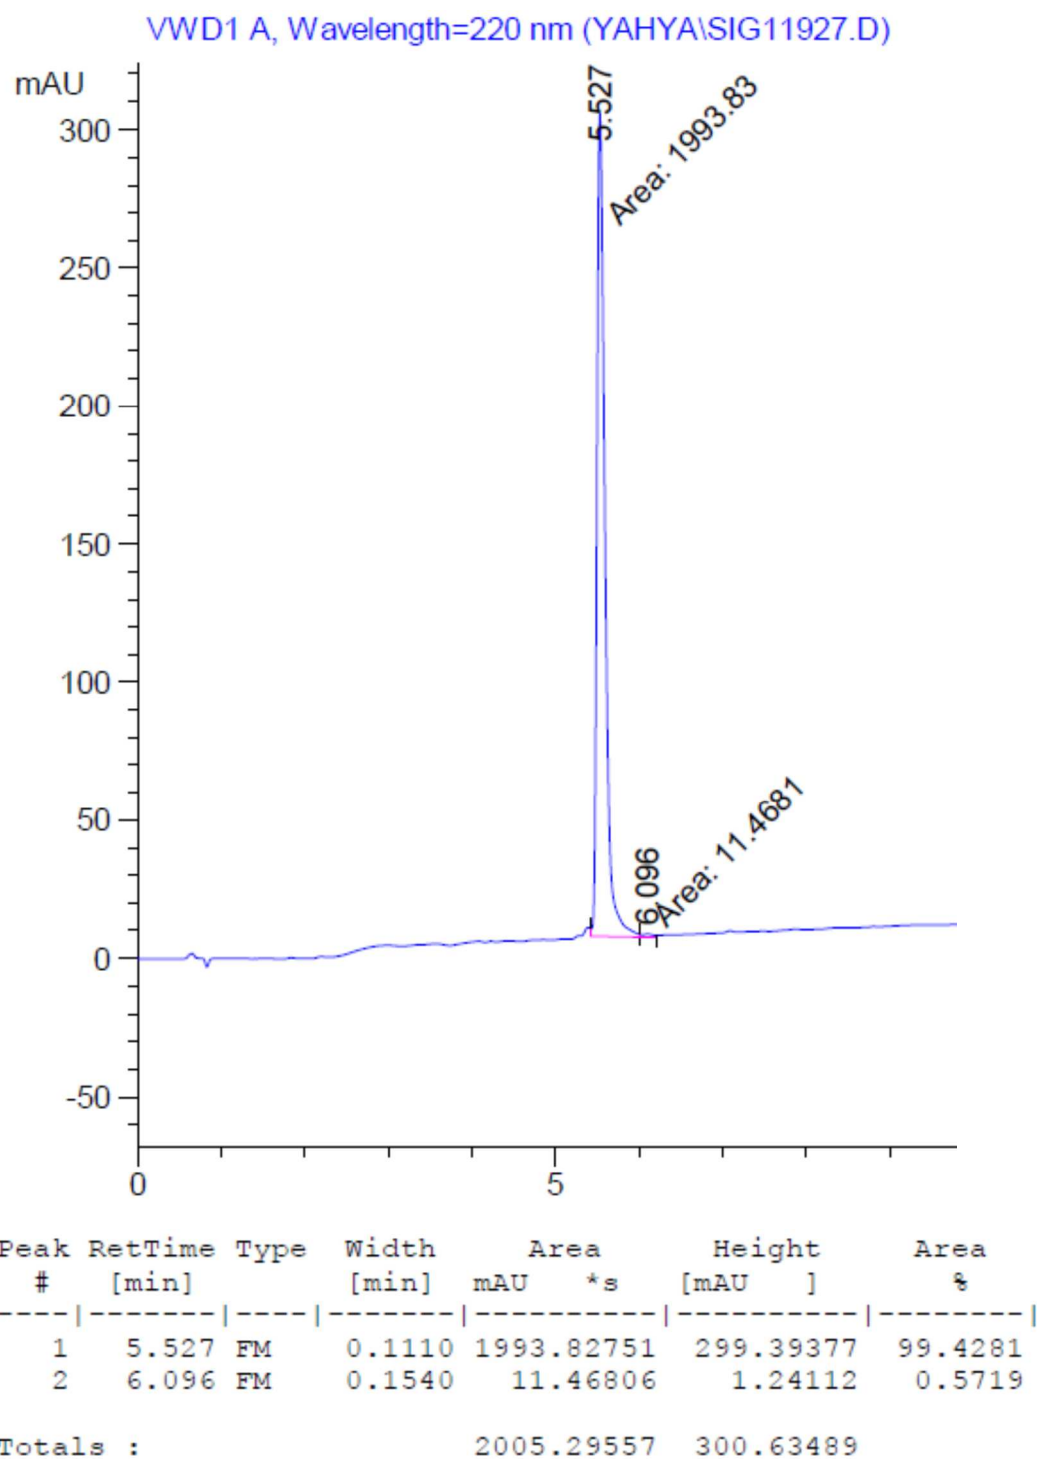

### 3.2-HOBt in THF

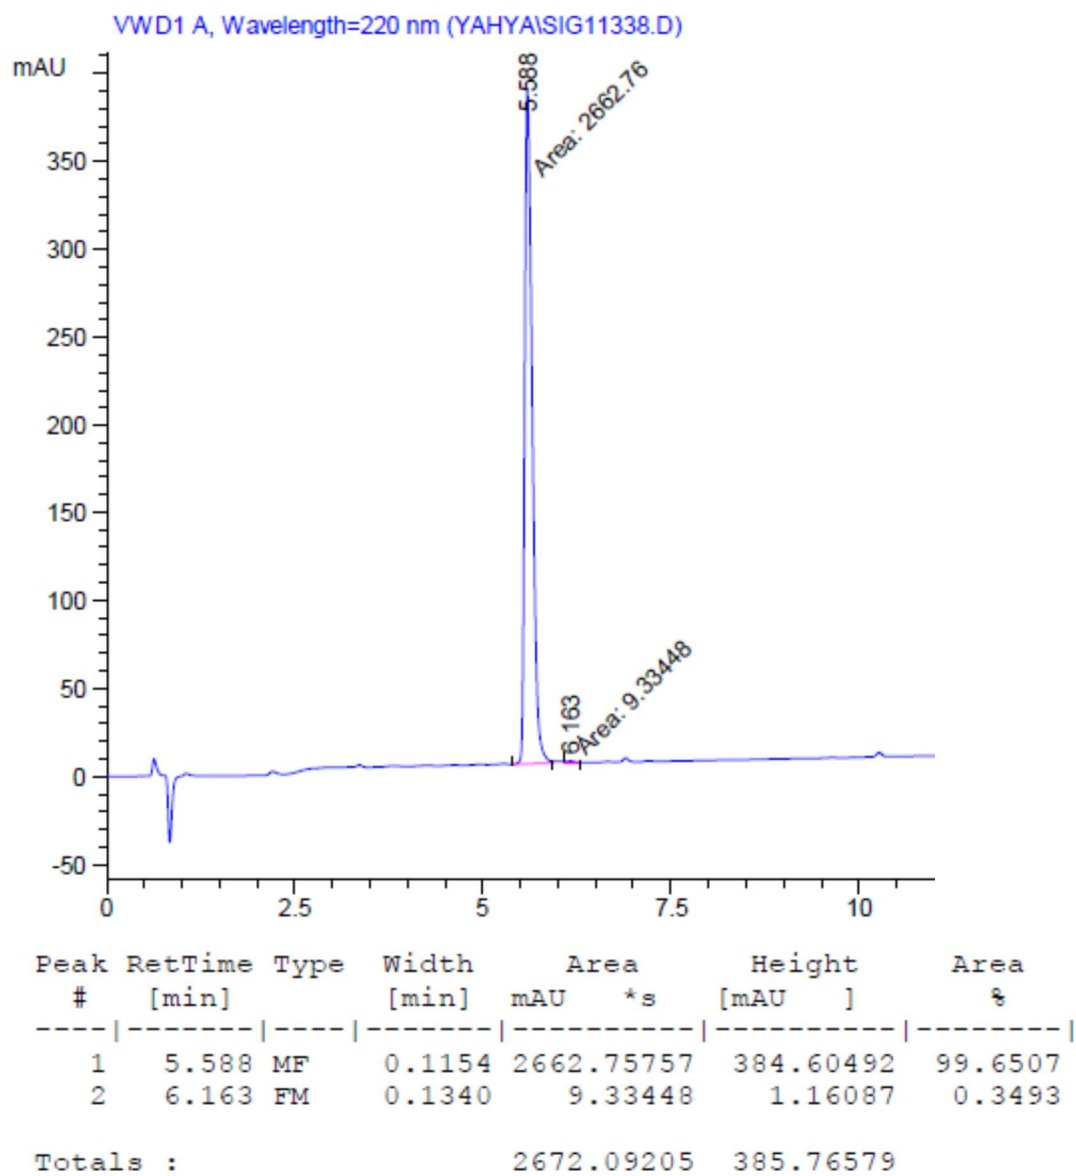

### 3.2-HOBt in ACN

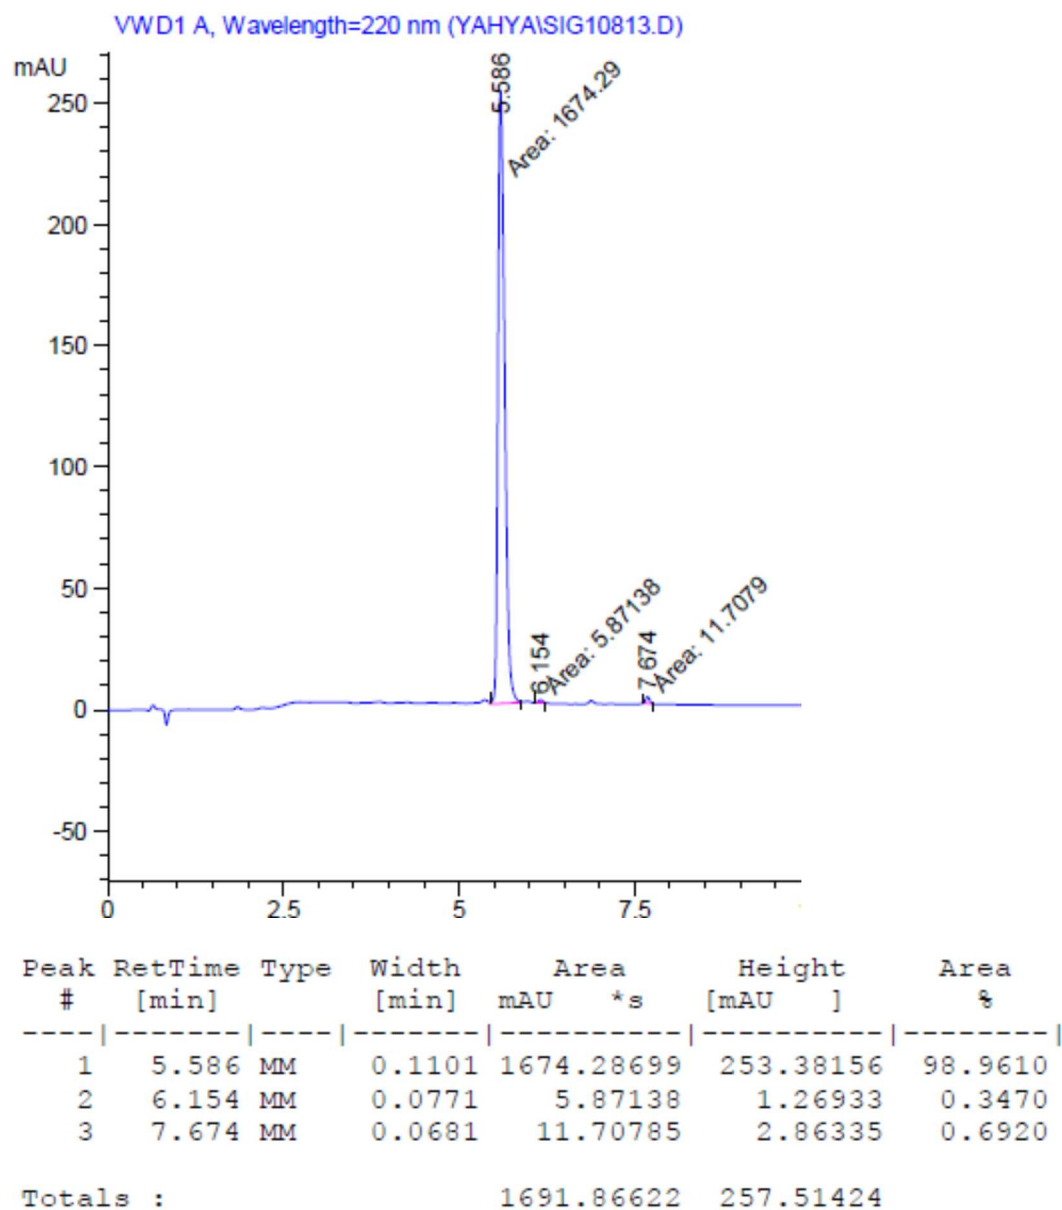



### 3.4-HOAt in DMF

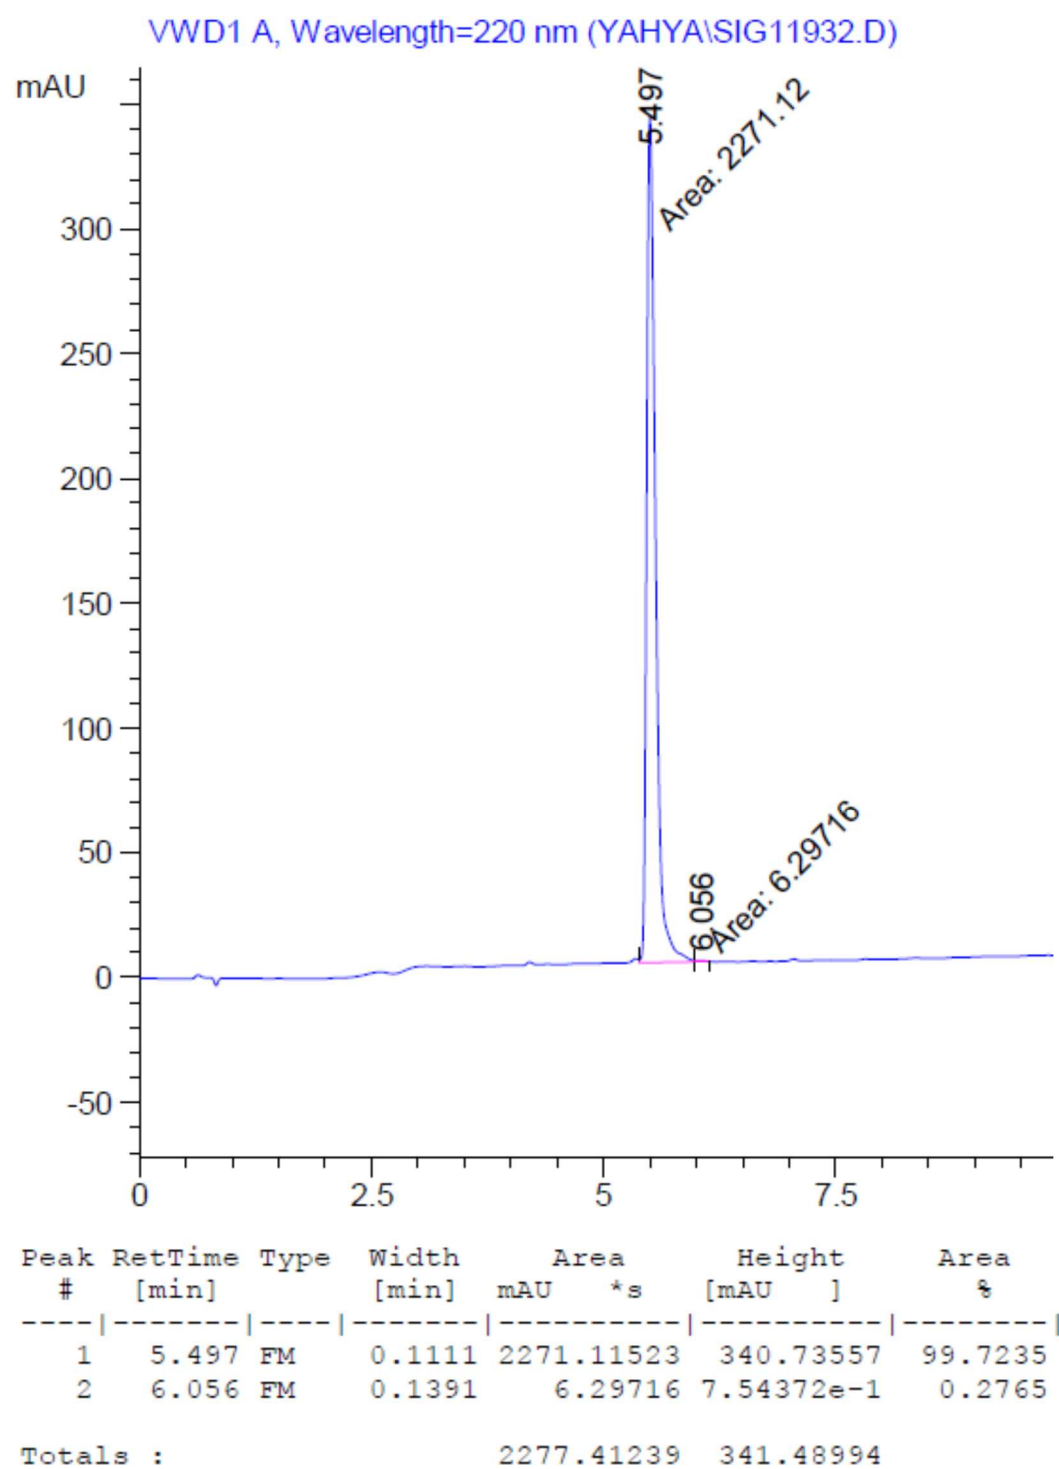

### 3.5-HOAt in THF

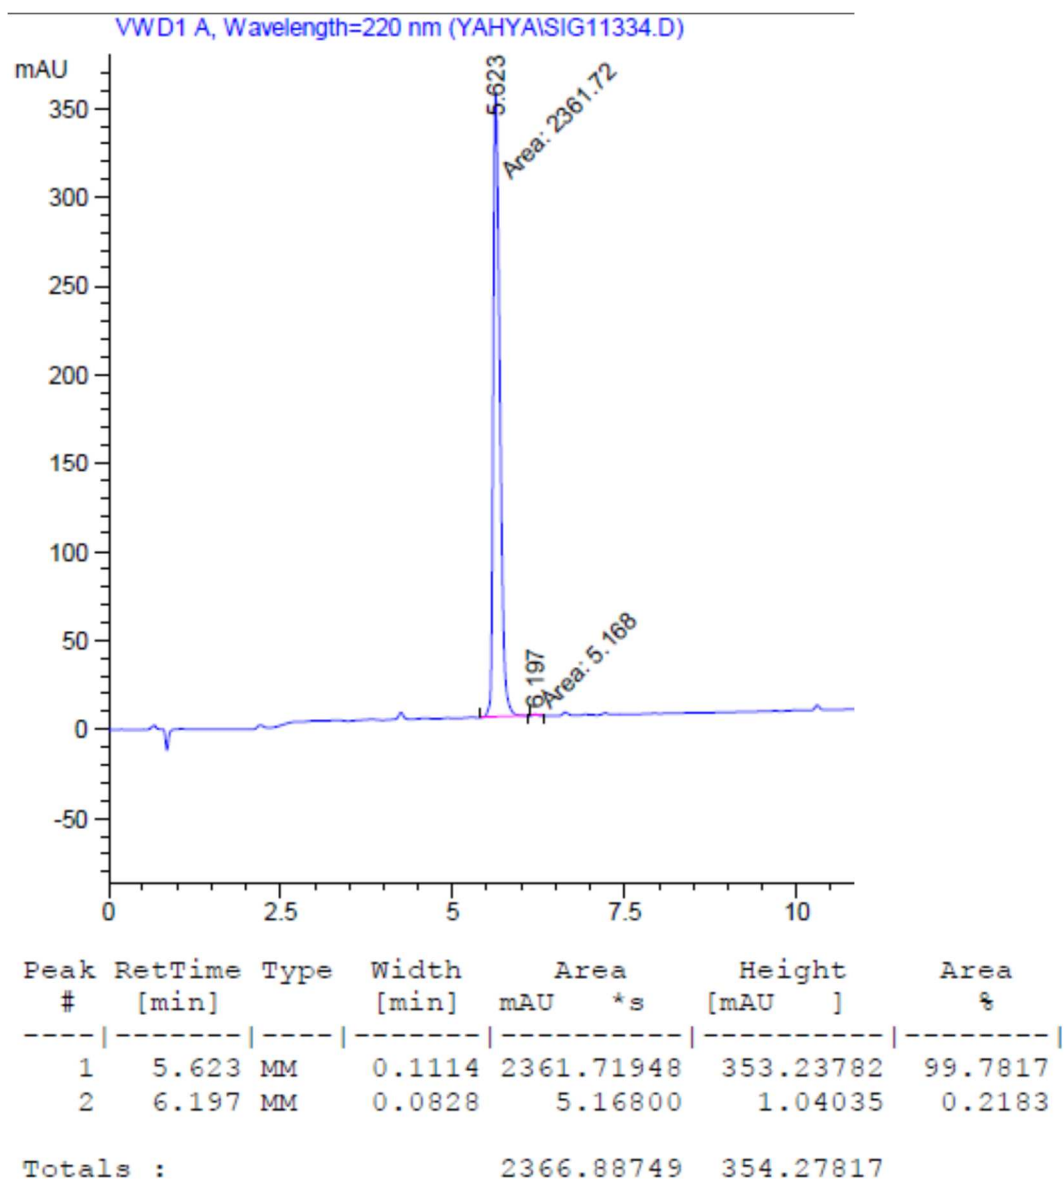

### 3.6-HOAt in ACN

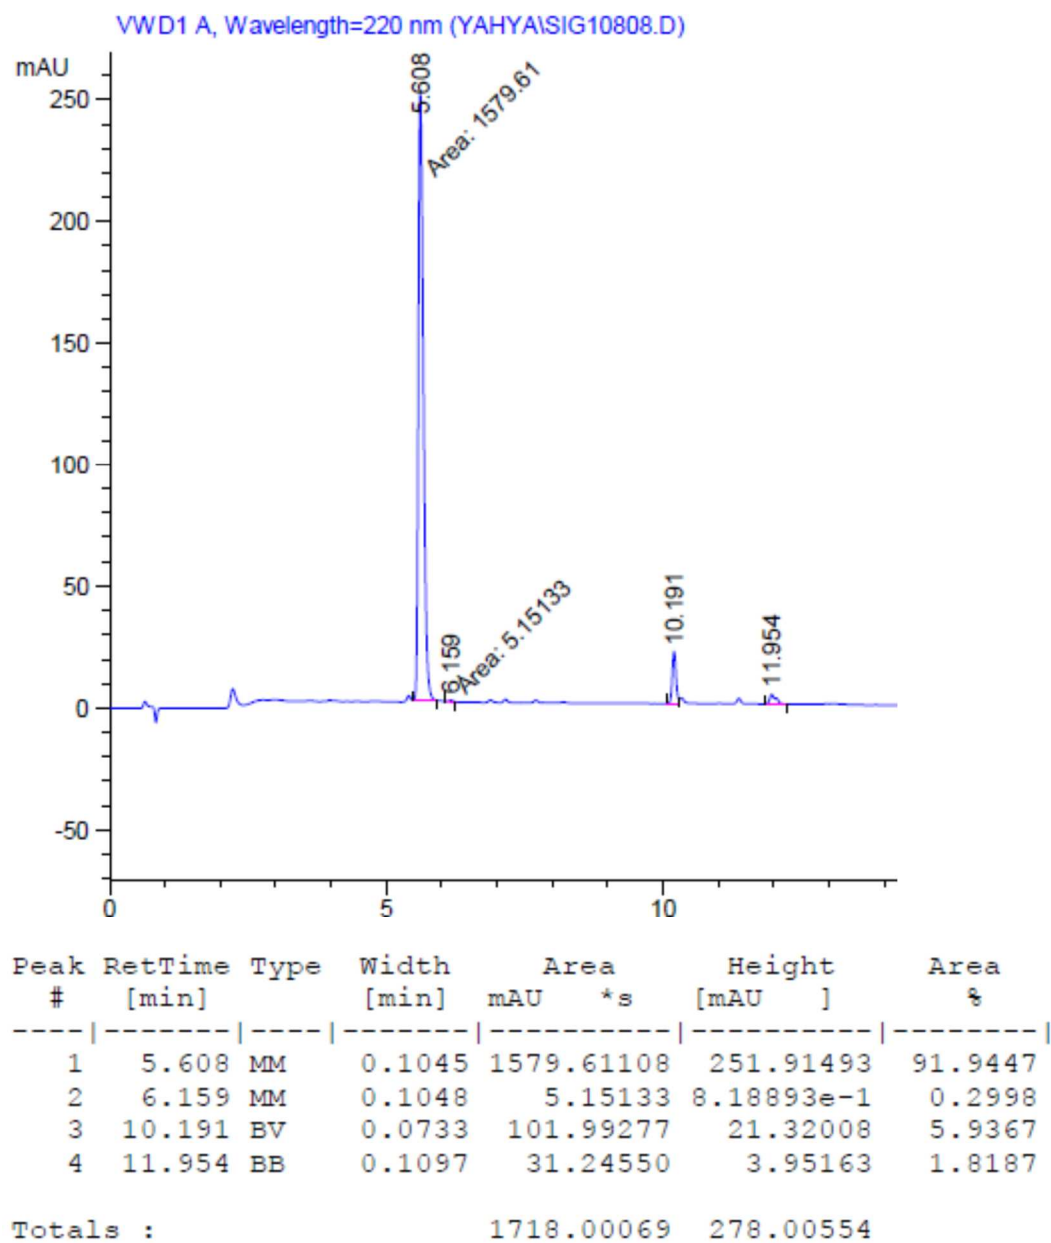

### 3.7-OxymaPure in DMF

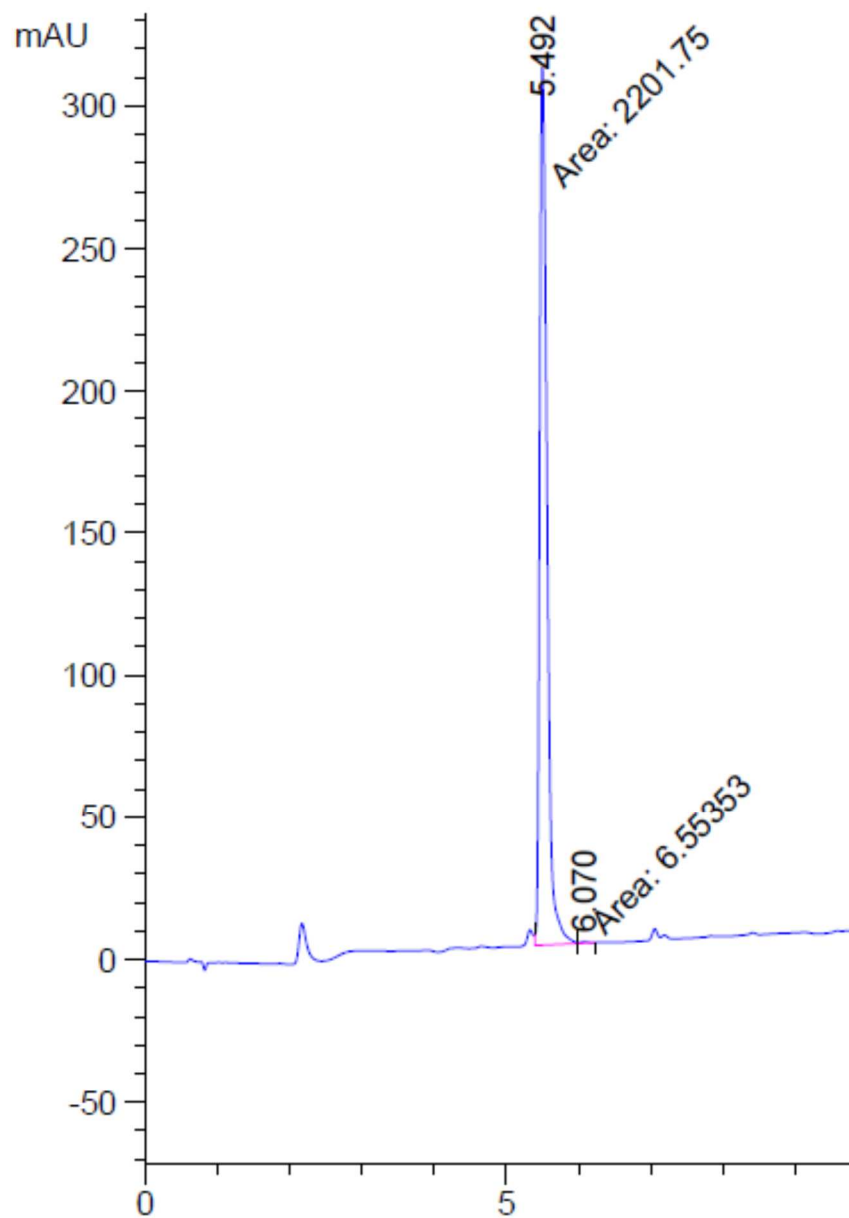

| Peak #   | RetTime [min] | Type | Width [min] | Area mAU *s | Height [mAU] | Area %  |
|----------|---------------|------|-------------|-------------|--------------|---------|
| 1        | 5.492         | FM   | 0.1184      | 2201.74780  | 310.03635    | 99.7032 |
| 2        | 6.070         | FM   | 0.1490      | 6.55353     | 7.33042e-1   | 0.2968  |
| Totals : |               |      |             | 2208.30133  | 310.76939    |         |

### 3.8-OxymaPure in THF

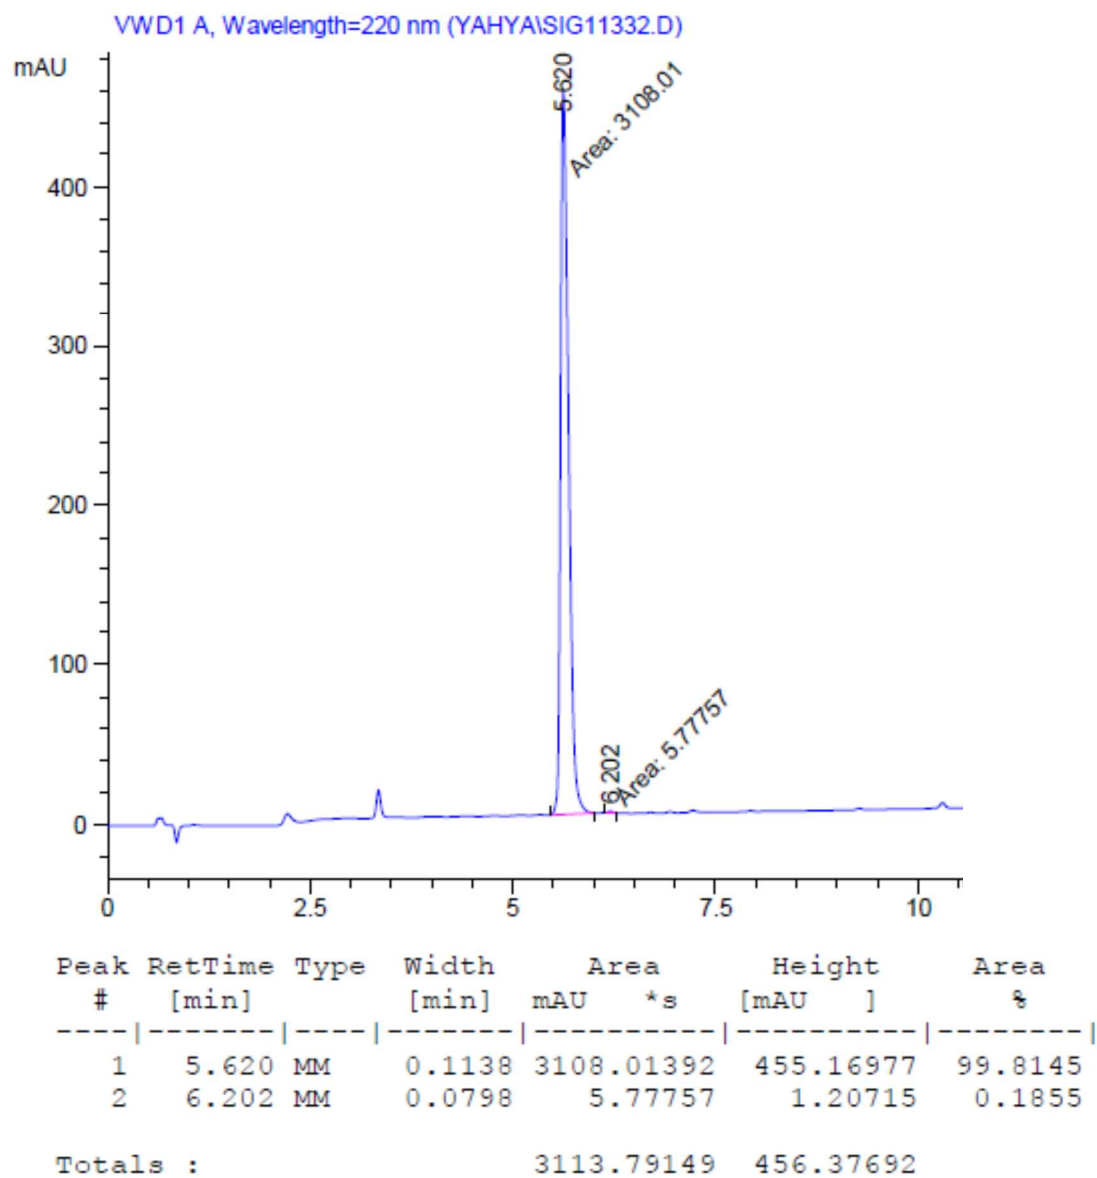

### 3.9-OxymaPure in ACN

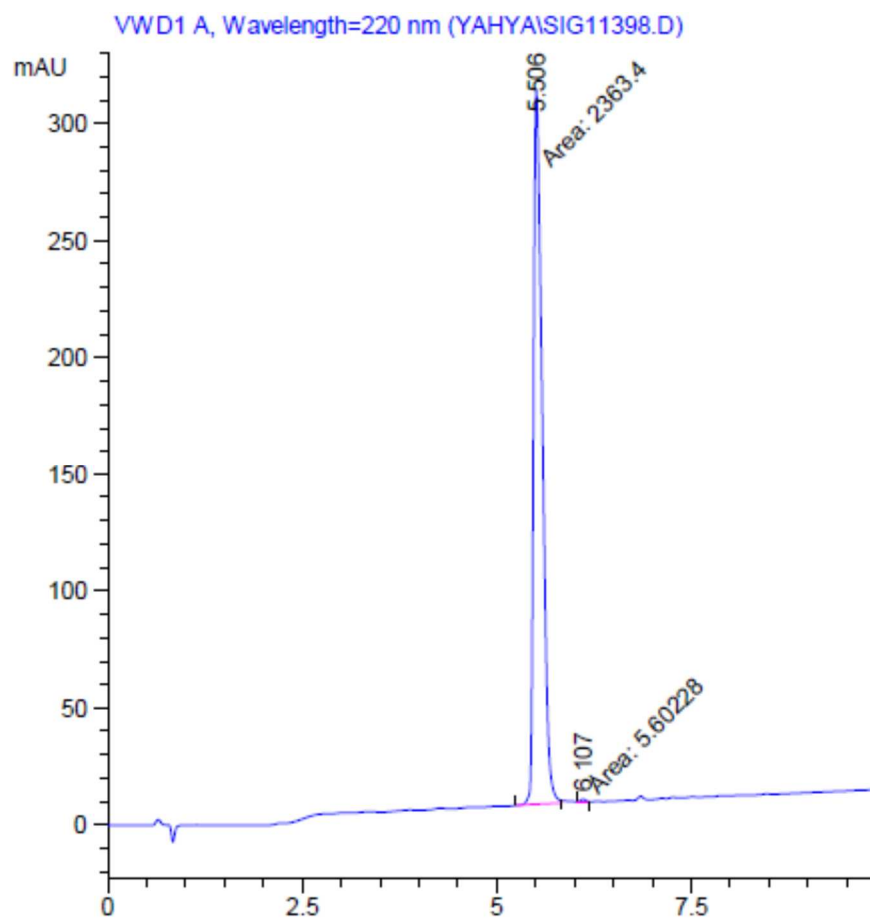

| Peak # | RetTime [min] | Type | Width [min] | Area mAU *s | Height [mAU] | Area %  |
|--------|---------------|------|-------------|-------------|--------------|---------|
| 1      | 5.506         | MF   | 0.1285      | 2363.39551  | 306.42755    | 99.7635 |
| 2      | 6.107         | FM   | 0.0795      | 5.60228     | 1.17441      | 0.2365  |

Totals : 2368.99779 307.60196

### 3.10- Oxyma-B in DMF

VWD1 A, Wavelength=220 nm (YAHYA\SIG11933.D)

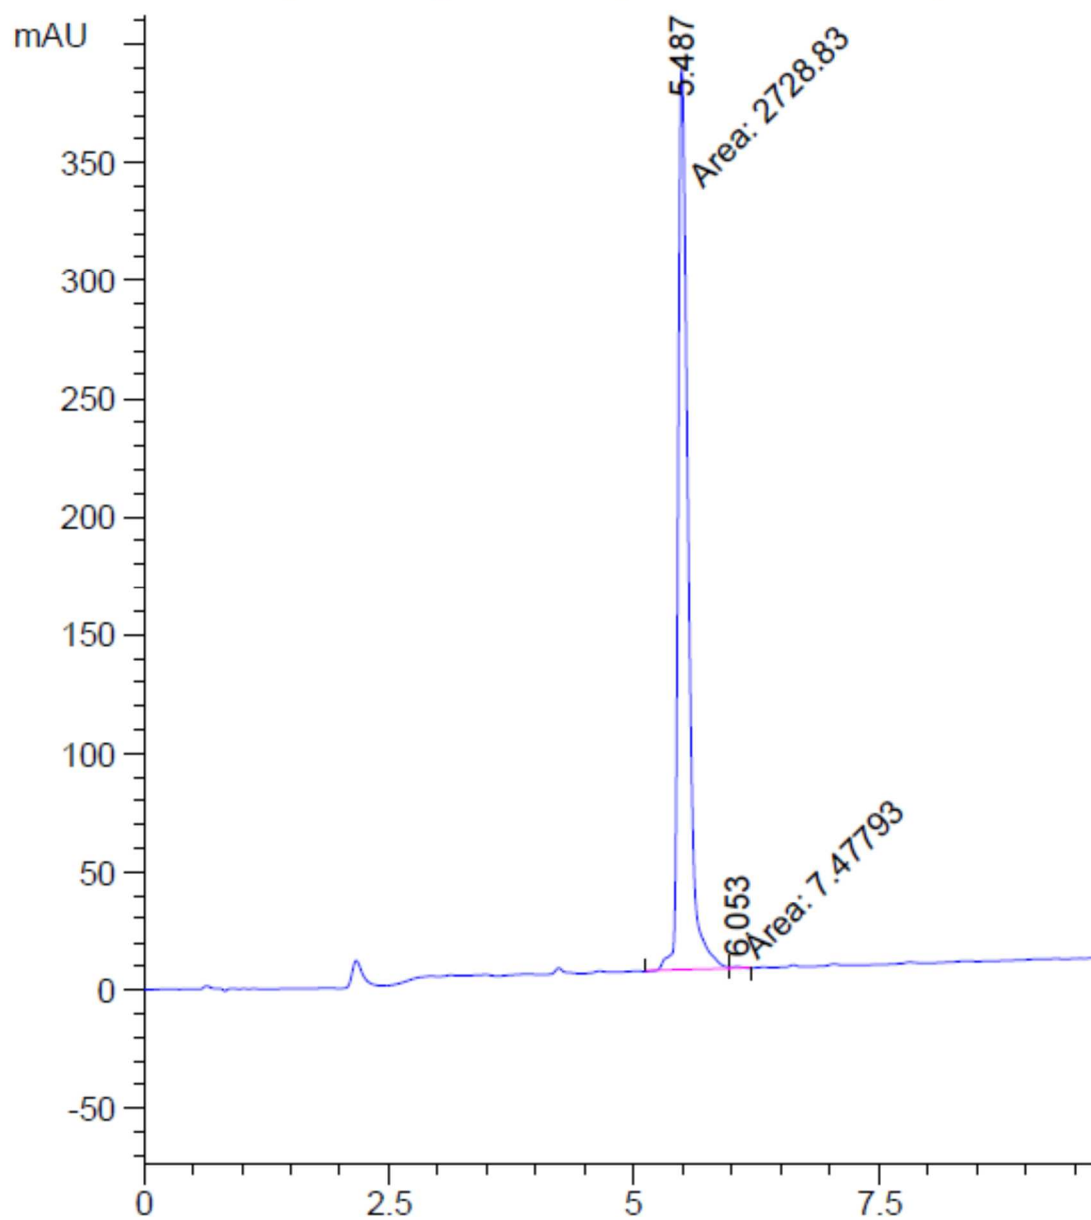

| Peak # | RetTime [min] | Type | Width [min] | Area mAU *s | Height [mAU] | Area %  |
|--------|---------------|------|-------------|-------------|--------------|---------|
| 1      | 5.487         | MF   | 0.1186      | 2728.83398  | 383.47549    | 99.7267 |
| 2      | 6.053         | FM   | 0.1387      | 7.47793     | 8.98371e-1   | 0.2733  |

Totals : 2736.31191 384.37387

### 3.11- Oxyma-B in THF

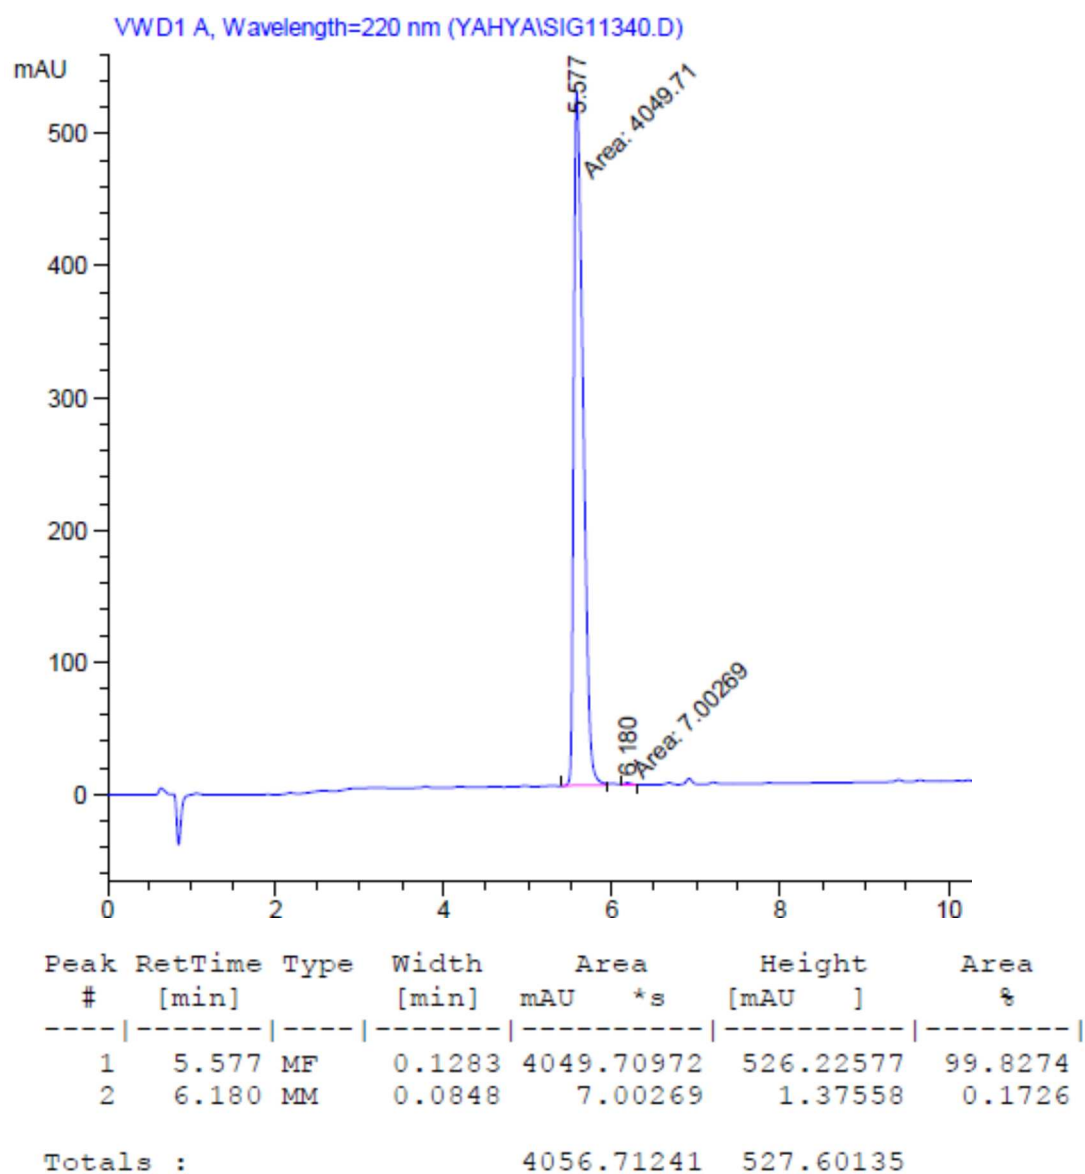



### 3.12- Oxyma-B in ACN

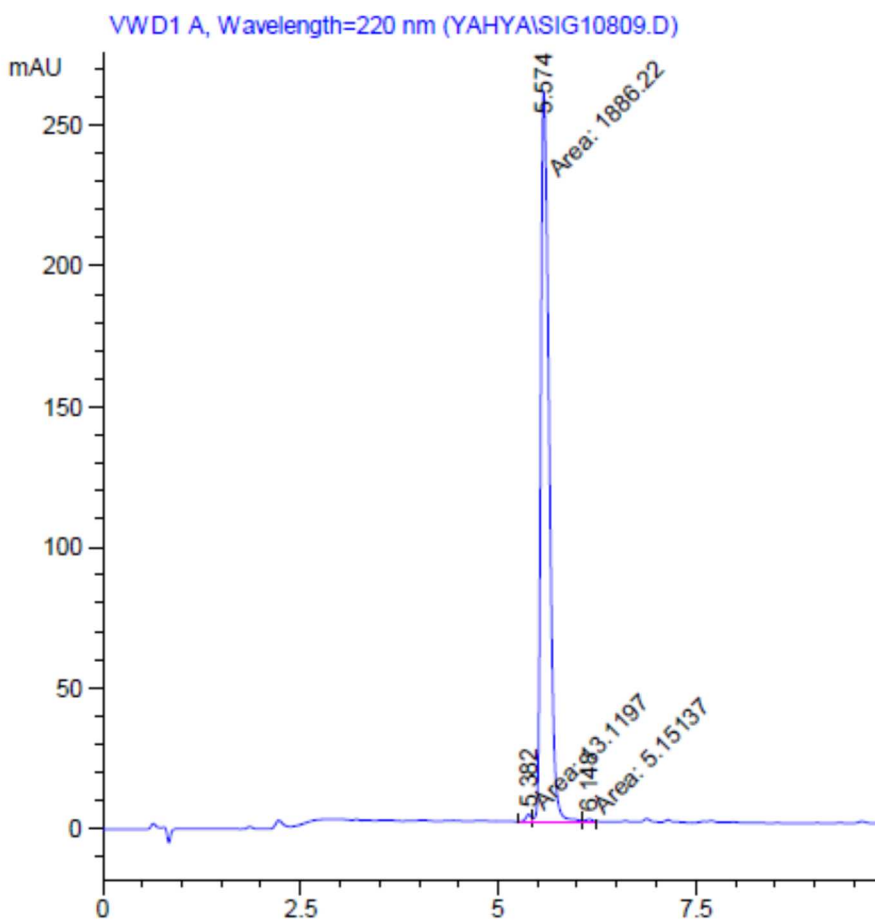

| Peak # | RetTime [min] | Type | Width [min] | Area mAU   | Area *s | Height [mAU] | Area %  |
|--------|---------------|------|-------------|------------|---------|--------------|---------|
| 1      | 5.382         | MF   | 0.0832      | 13.11968   |         | 2.62848      | 0.6889  |
| 2      | 5.574         | FM   | 0.1209      | 1886.22241 |         | 259.94125    | 99.0406 |
| 3      | 6.148         | FM   | 0.1006      | 5.15137    |         | 8.53031e-1   | 0.2705  |

Totals : 1904.49346 263.42276

## 4- H-Gly-Cys-Phe-NH<sub>2</sub> racemization experiments

### 4.1-HOBt in DMF

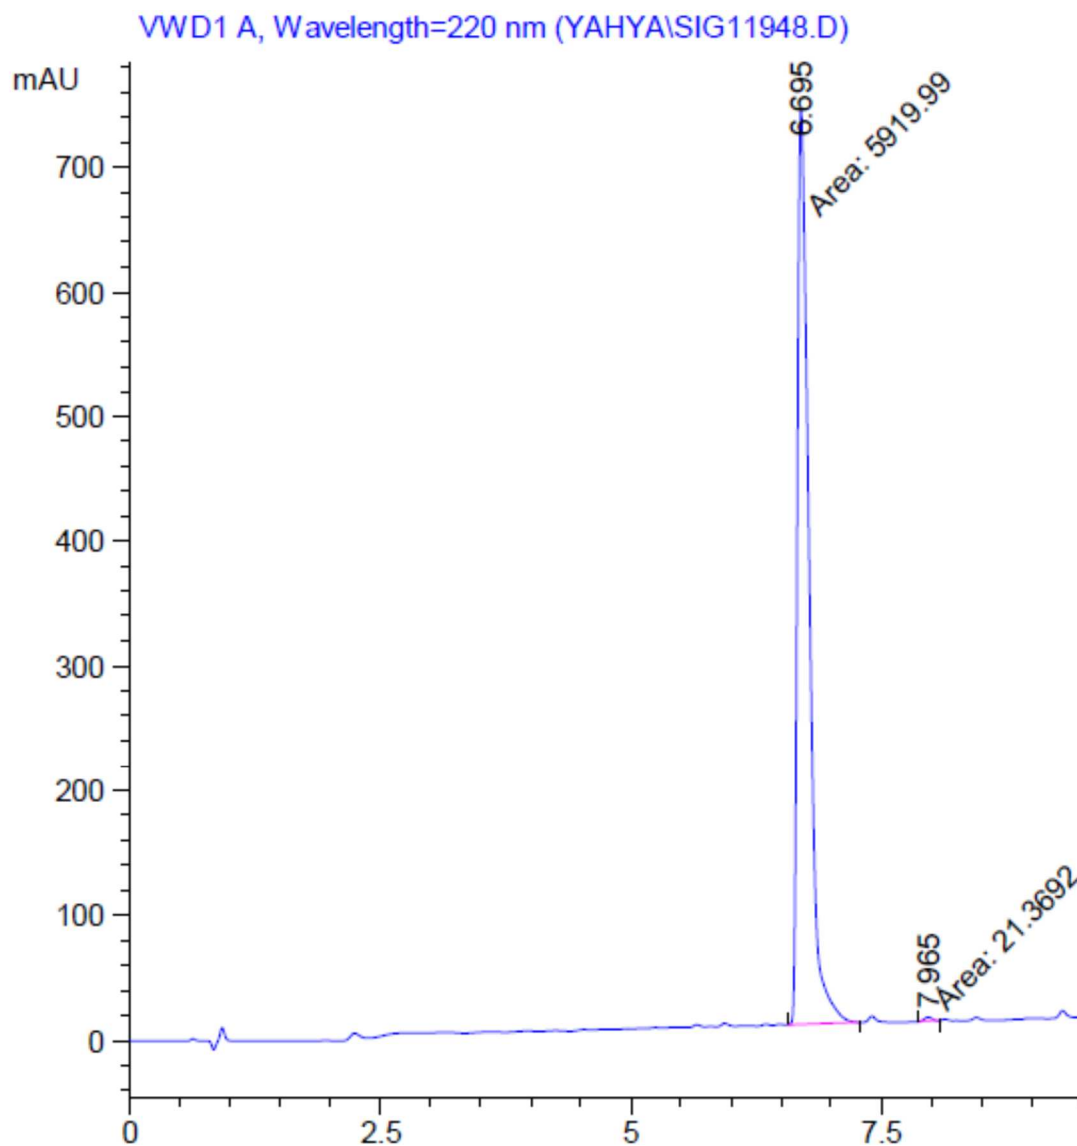

| Peak # | RetTime [min] | Type | Width [min] | Area mAU   | Height [mAU] | Area %  |
|--------|---------------|------|-------------|------------|--------------|---------|
| 1      | 6.695         | MM   | 0.1340      | 5919.99268 | 736.52924    | 99.6403 |
| 2      | 7.965         | MM   | 0.0989      | 21.36915   | 3.60116      | 0.3597  |

Totals : 5941.36183 740.13040

# 4.2-HOBt in THF

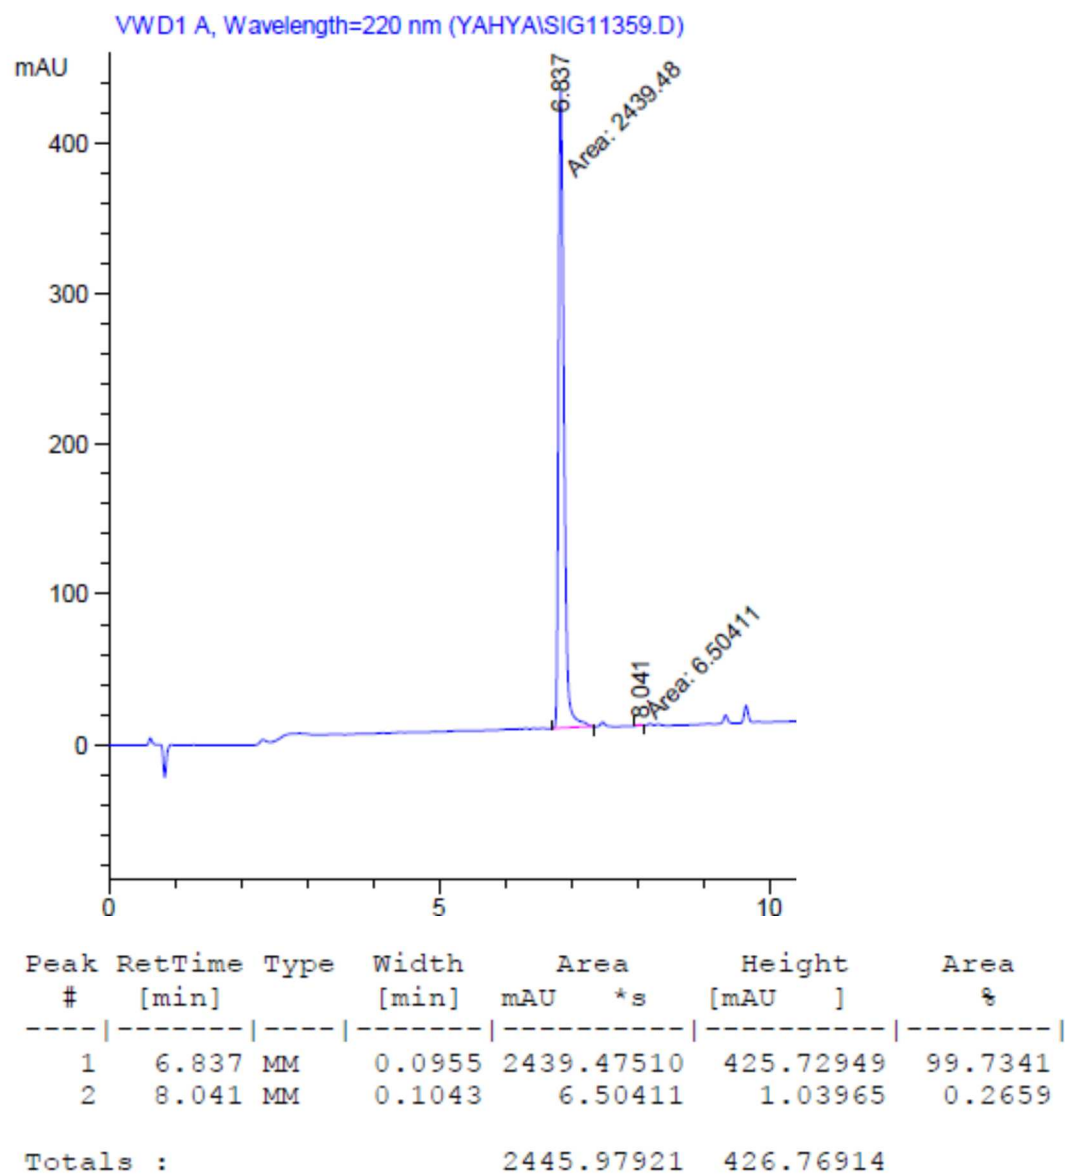

#### 4.3-HOBt in ACN

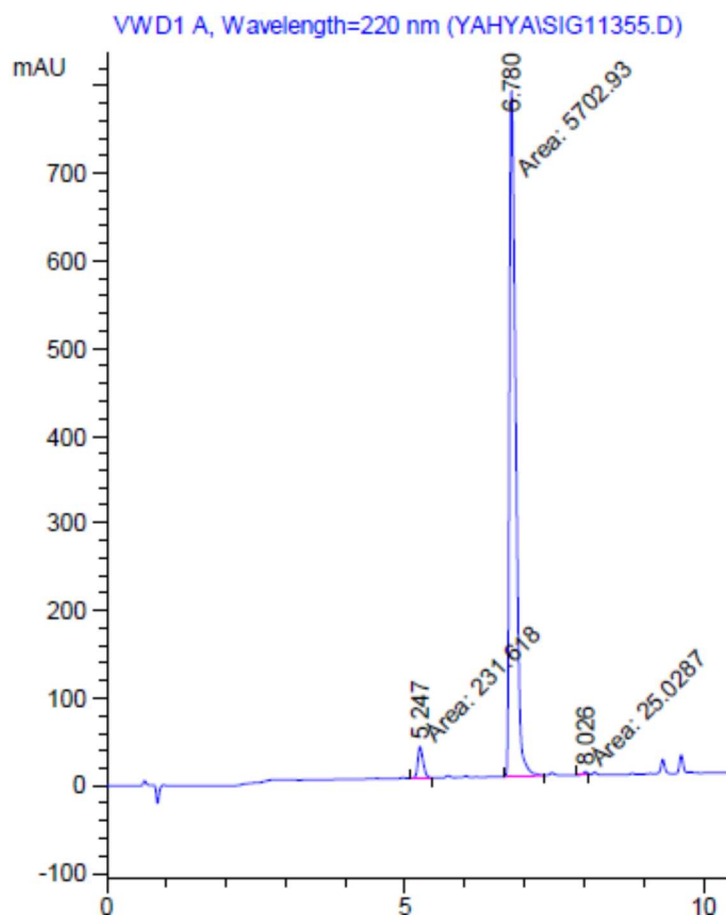

| Peak # | RetTime [min] | Type | Width [min] | Area mAU *s | Height [mAU] | Area %  |
|--------|---------------|------|-------------|-------------|--------------|---------|
| 1      | 5.247         | MM   | 0.1060      | 231.61769   | 36.42426     | 3.8865  |
| 2      | 6.780         | MM   | 0.1209      | 5702.93359  | 785.86230    | 95.6935 |
| 3      | 8.026         | MF   | 0.0993      | 25.02871    | 4.20064      | 0.4200  |

Totals : 5959.58000 826.48721

# 4.4-HOAt in DMF

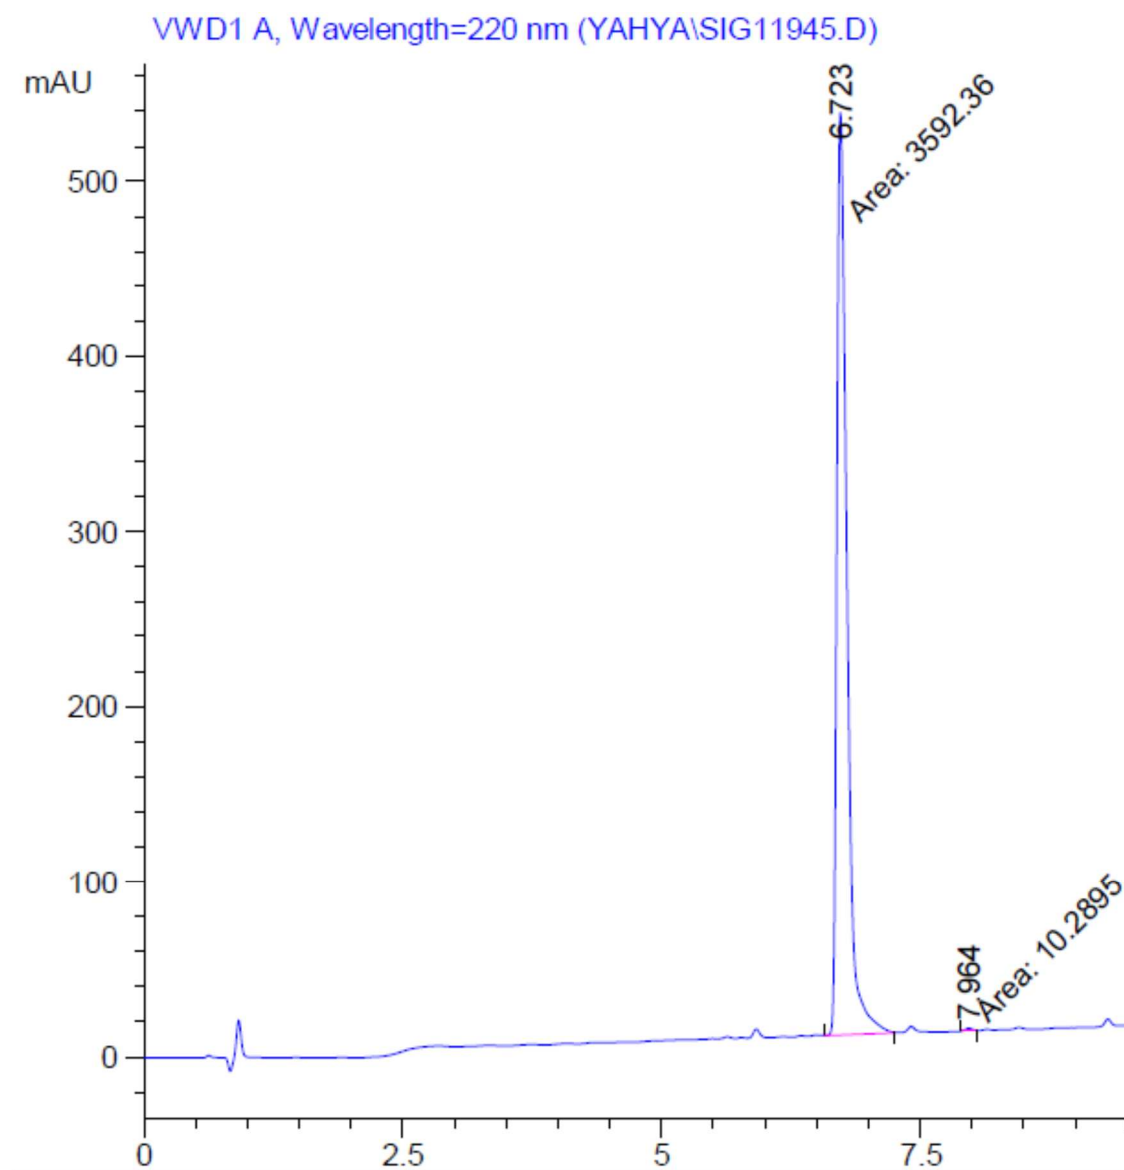

| Peak # | RetTime [min] | Type | Width [min] | Area mAU *s | Height [mAU] | Area %  |
|--------|---------------|------|-------------|-------------|--------------|---------|
| 1      | 6.723         | MM   | 0.1132      | 3592.36328  | 528.82007    | 99.7144 |
| 2      | 7.964         | MM   | 0.0931      | 10.28946    | 1.84258      | 0.2856  |

Totals : 3602.65274 530.66265

# 4.5-HOAt in THF

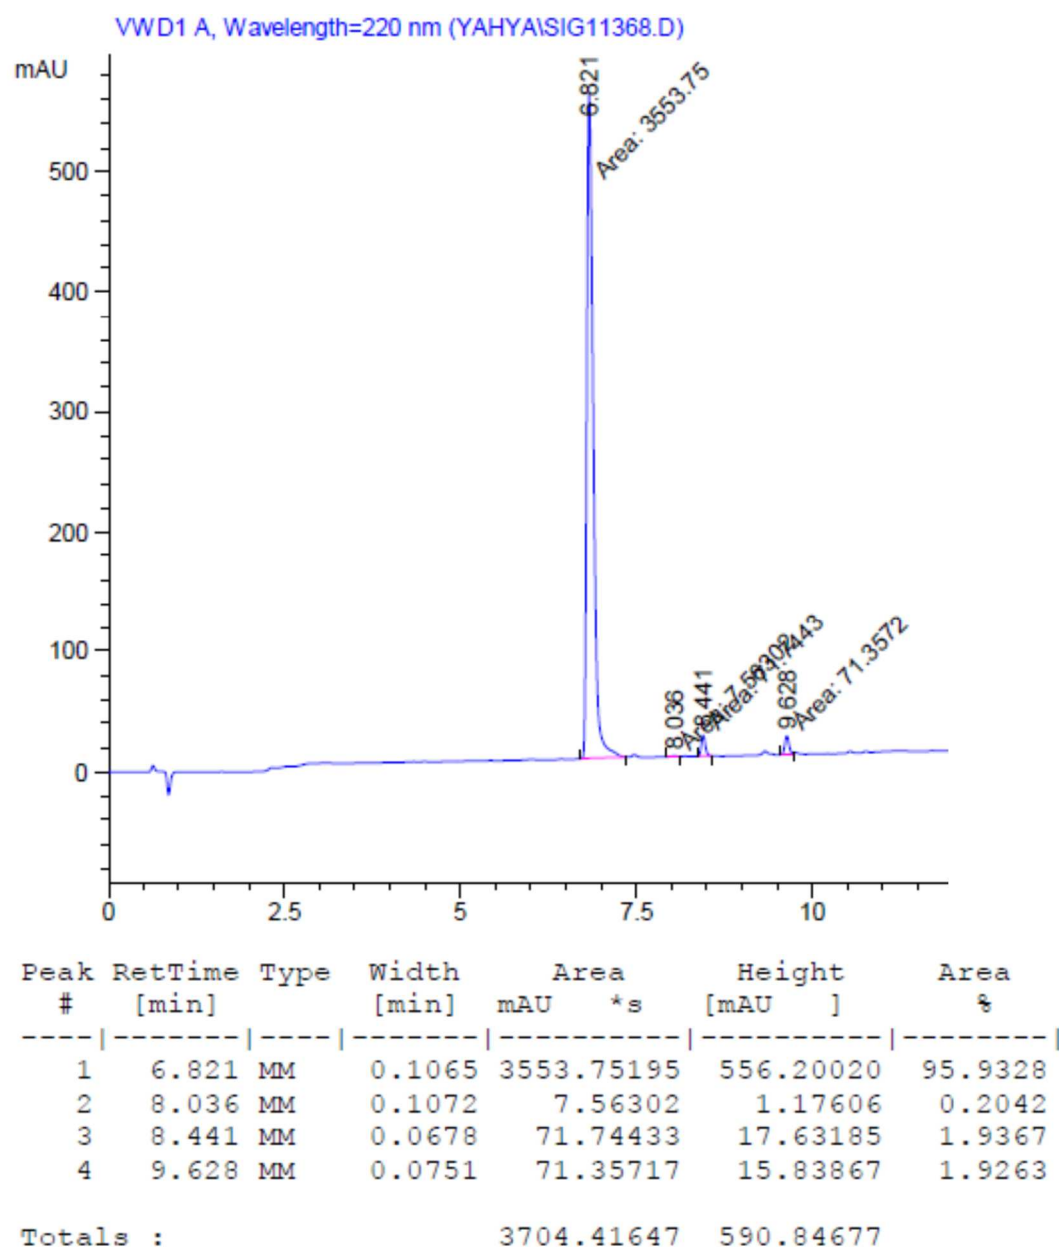

# 4.6-HOAt in ACN

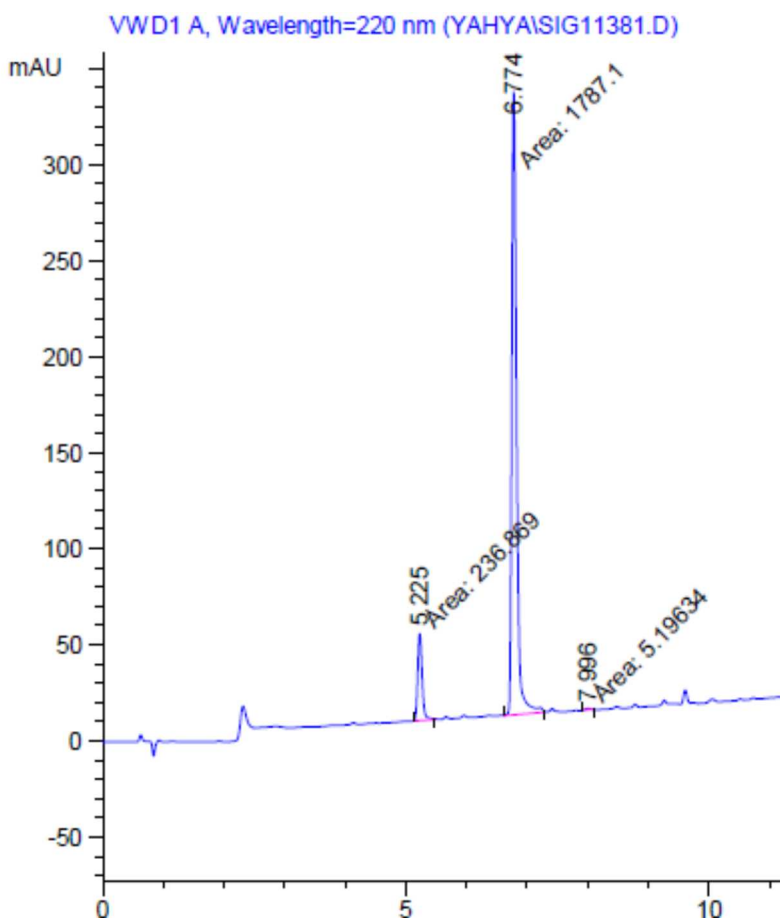

| Peak # | RetTime [min] | Type | Width [min] | Area mAU   | Height [mAU] | Area %  |
|--------|---------------|------|-------------|------------|--------------|---------|
| 1      | 5.225         | MM   | 0.0868      | 236.86908  | 45.48138     | 11.6732 |
| 2      | 6.774         | MM   | 0.0913      | 1787.09766 | 326.34229    | 88.0707 |
| 3      | 7.996         | MM   | 0.1049      | 5.19634    | 8.25580e-1   | 0.2561  |

Totals : 2029.16307 372.64924

# 4.7-OxymaPure in DMF

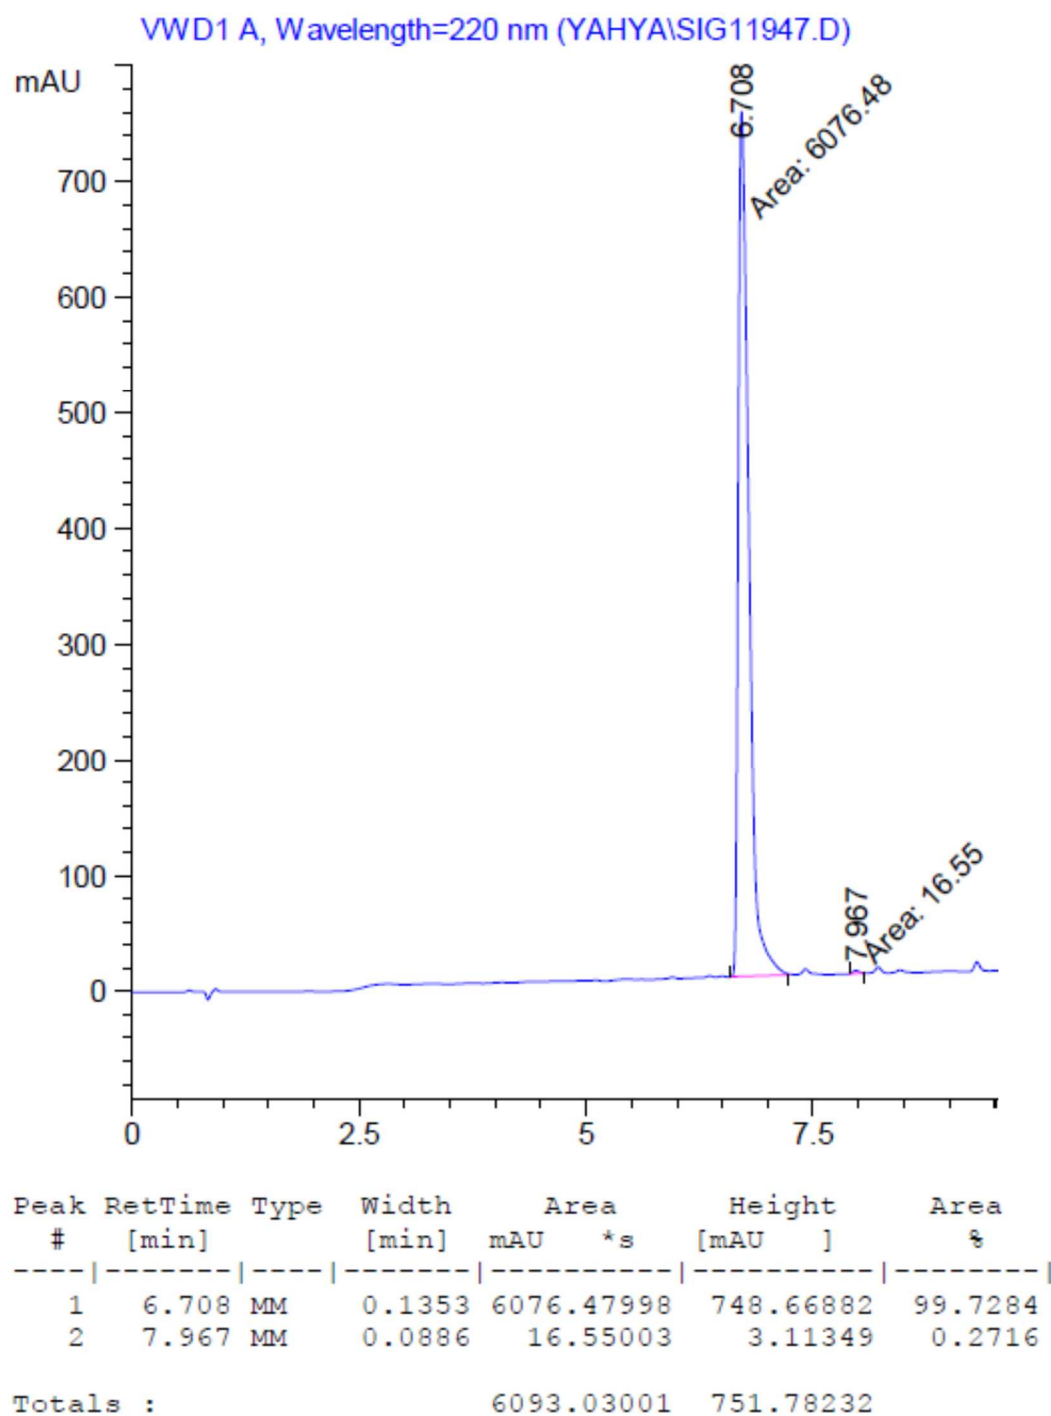



# 4.8-OxymaPure in THF

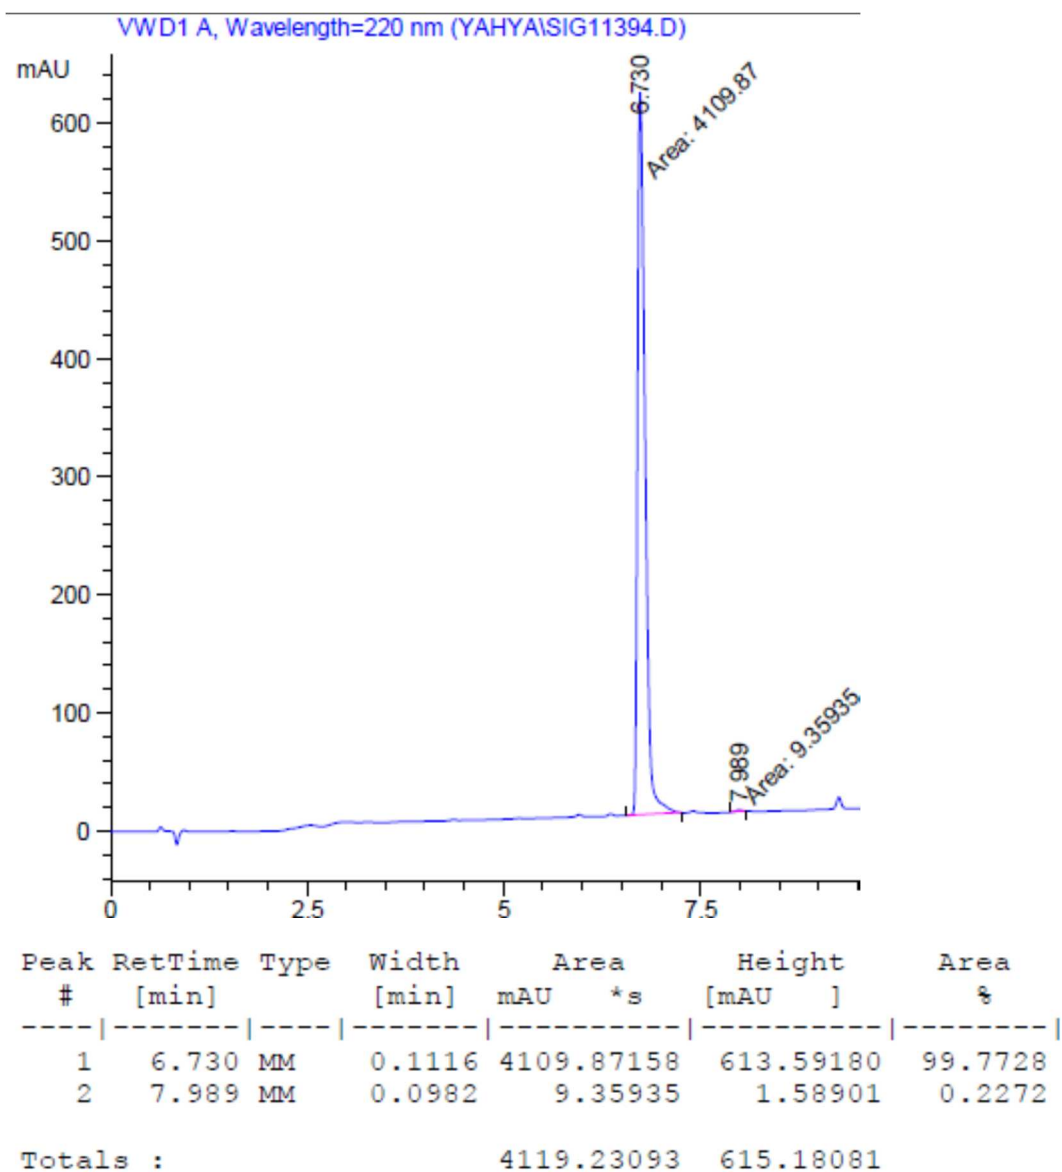

# 4.9-OxymaPure in ACN

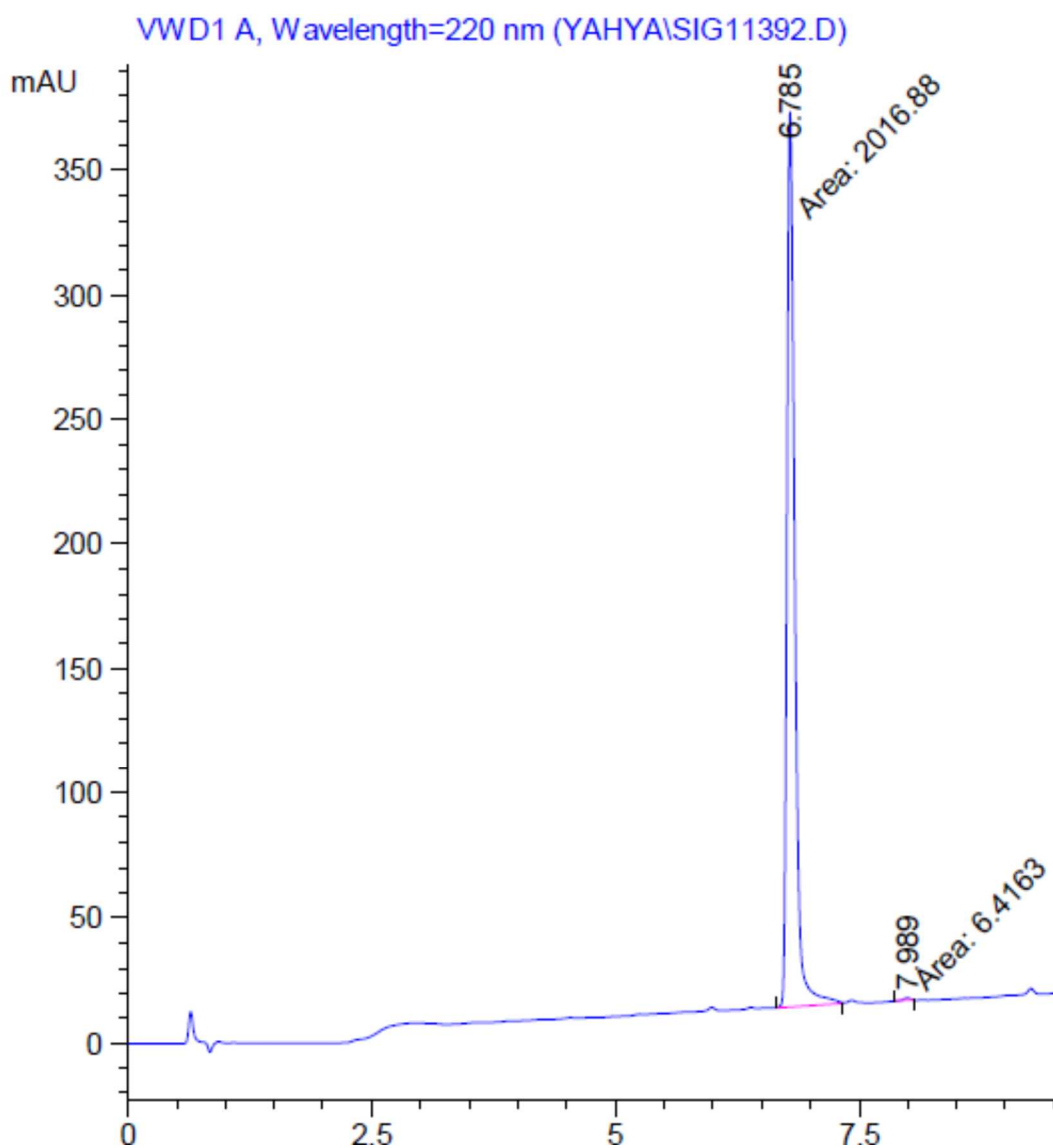

| Peak # | RetTime [min] | Type | Width [min] | Area mAU *s | Height [mAU] | Area %  |
|--------|---------------|------|-------------|-------------|--------------|---------|
| 1      | 6.785         | MM   | 0.0932      | 2016.87634  | 360.57712    | 99.6829 |
| 2      | 7.989         | MM   | 0.0926      | 6.41630     | 1.15442      | 0.3171  |

Totals : 2023.29264 361.73154

# 4.10- Oxyma-B in DMF

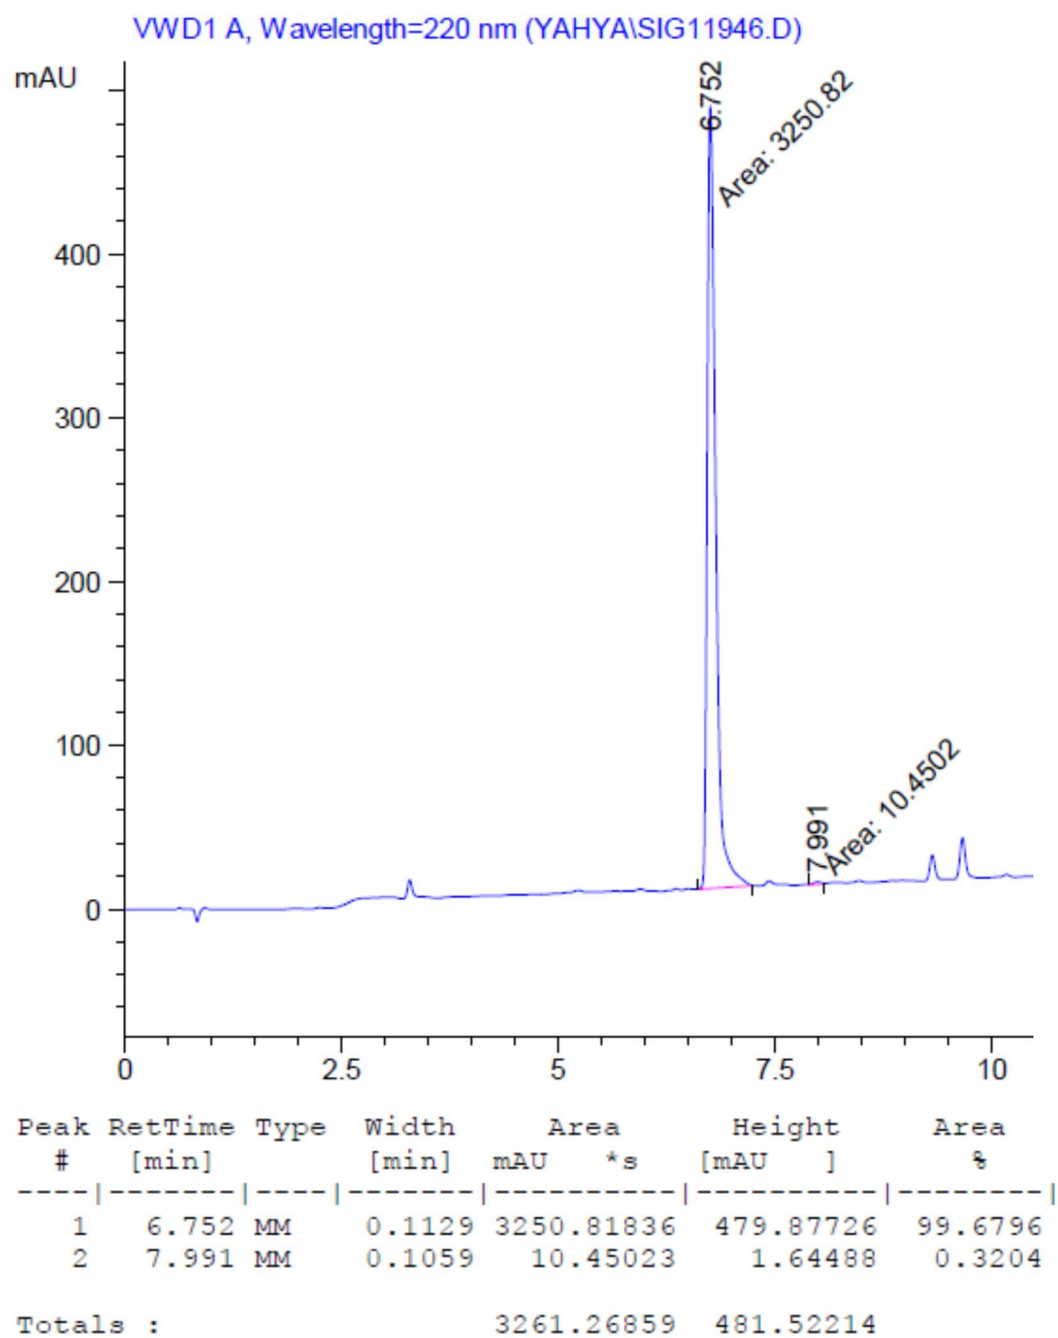

# 4.11- Oxyma-B in THF

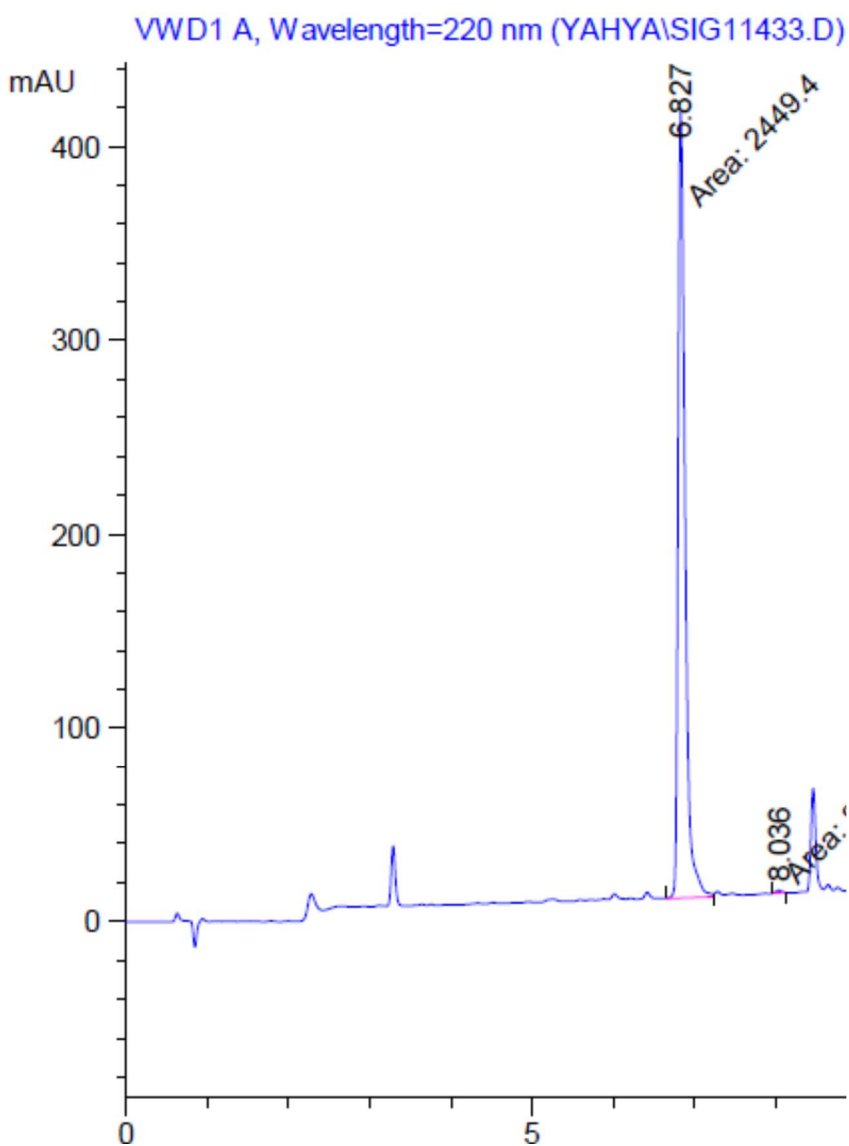

| Peak # | RetTime [min] | Type | Width [min] | Area mAU *s | Height [mAU] | Area %  |
|--------|---------------|------|-------------|-------------|--------------|---------|
| 1      | 6.827         | MM   | 0.0998      | 2449.40479  | 408.85620    | 99.6601 |
| 2      | 8.036         | MM   | 0.0882      | 8.35345     | 1.57886      | 0.3399  |

Totals : 2457.75824 410.43507

#### 4.12- Oxyma-B in ACN

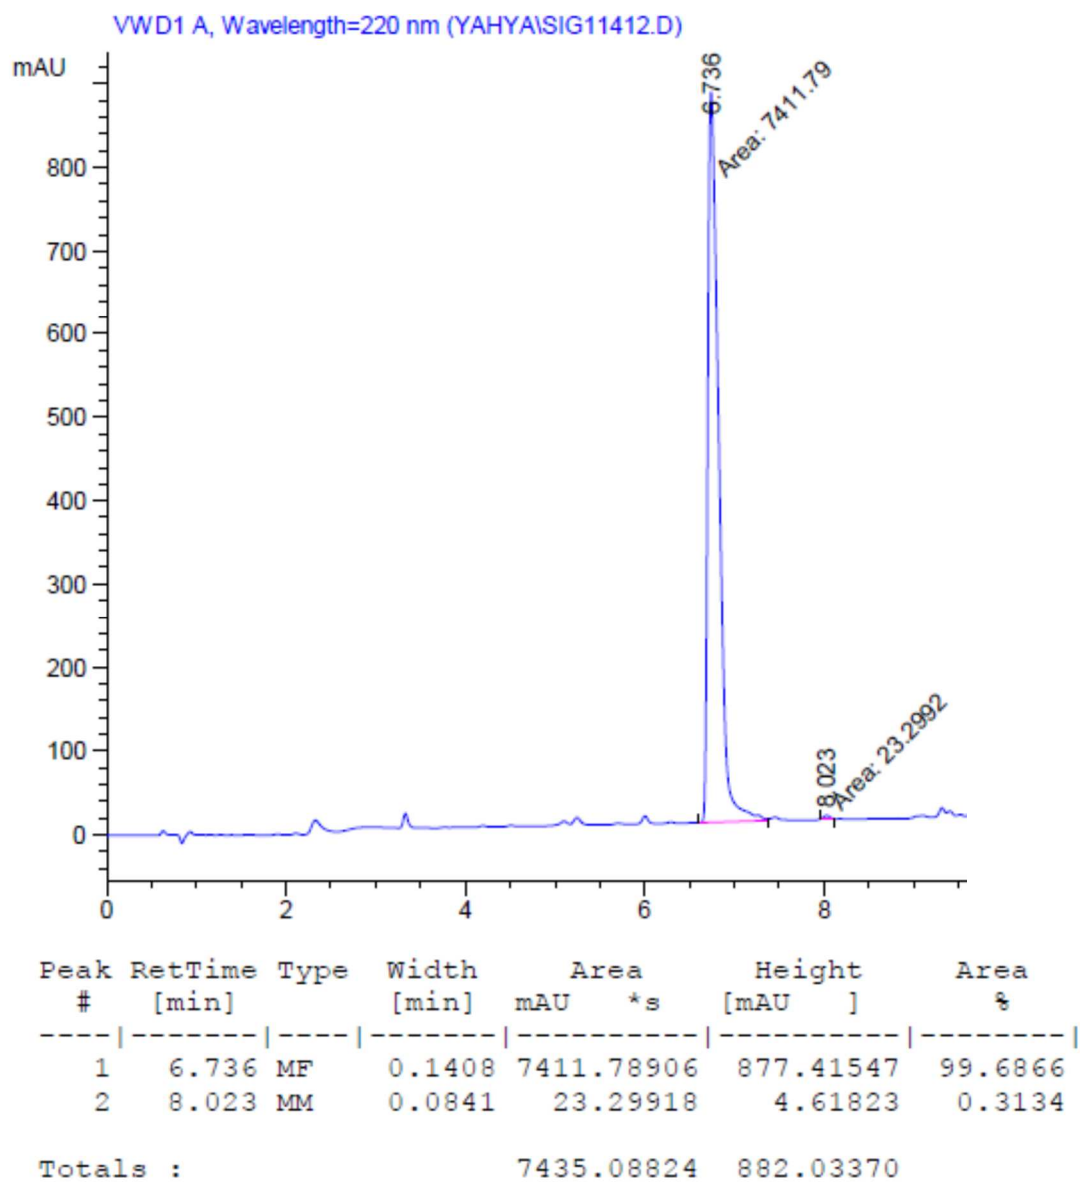

## 5- Peptide synthesis experiments (Synthesis of H-Tyr-Aib-Aib-Phe-Leu-NH<sub>2</sub>)

### 5.1- HOBt in DMF

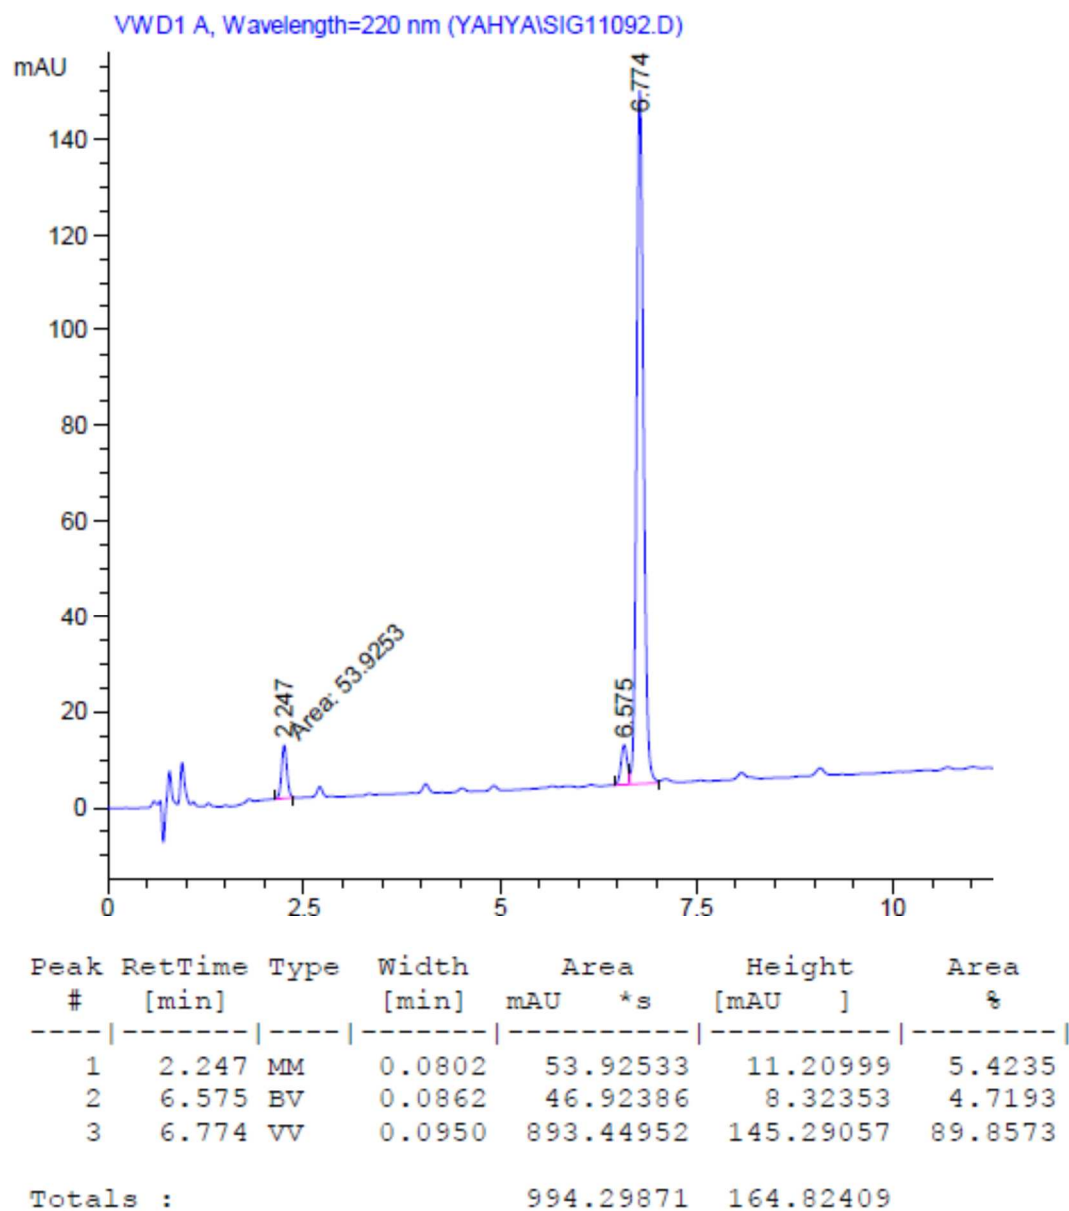

## 5.2- HOBt in THF

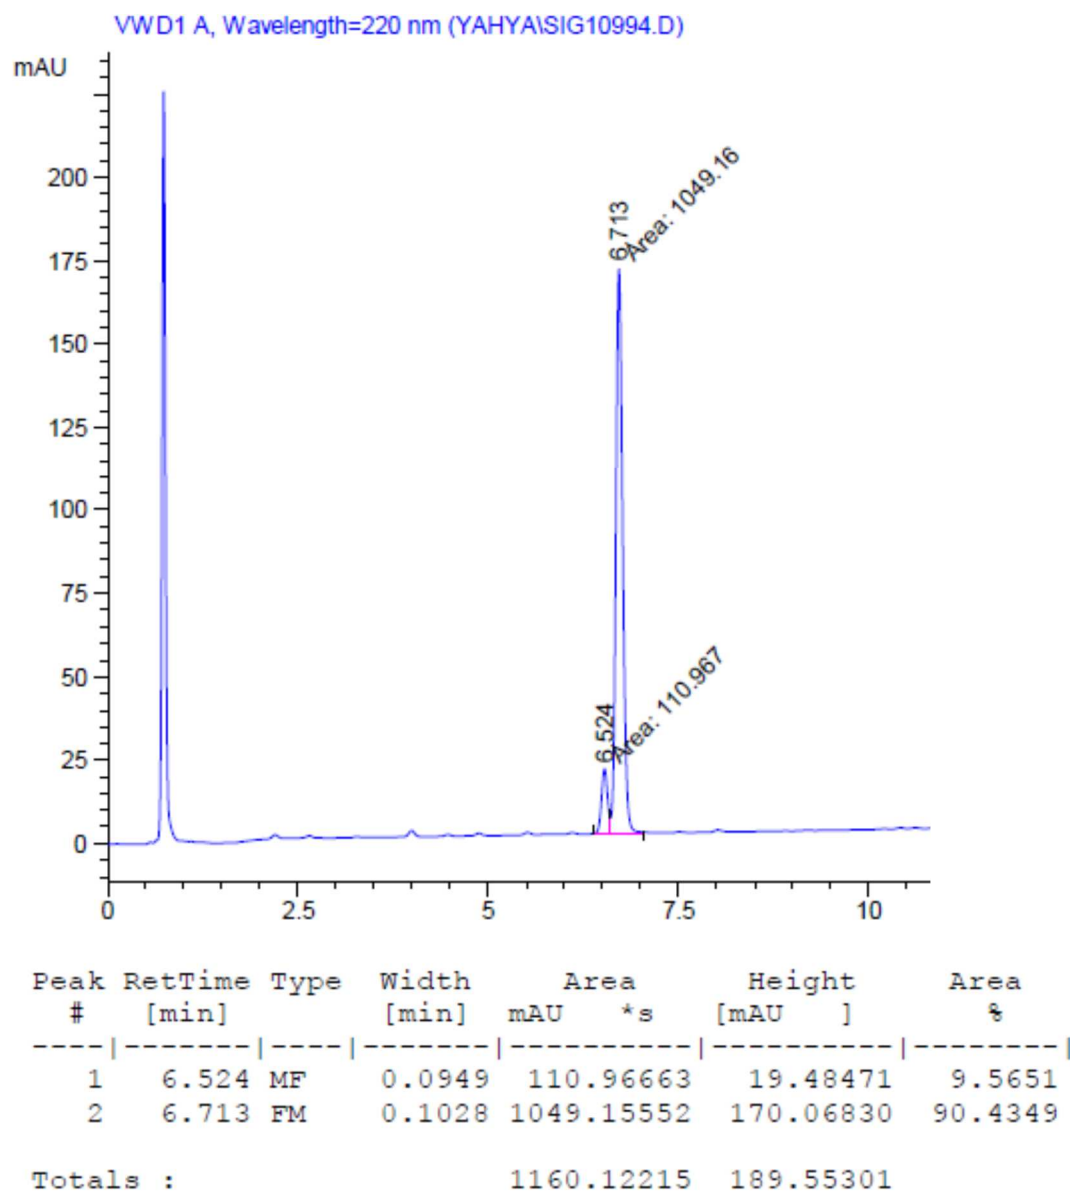

### 5.3- HOBt in ACN

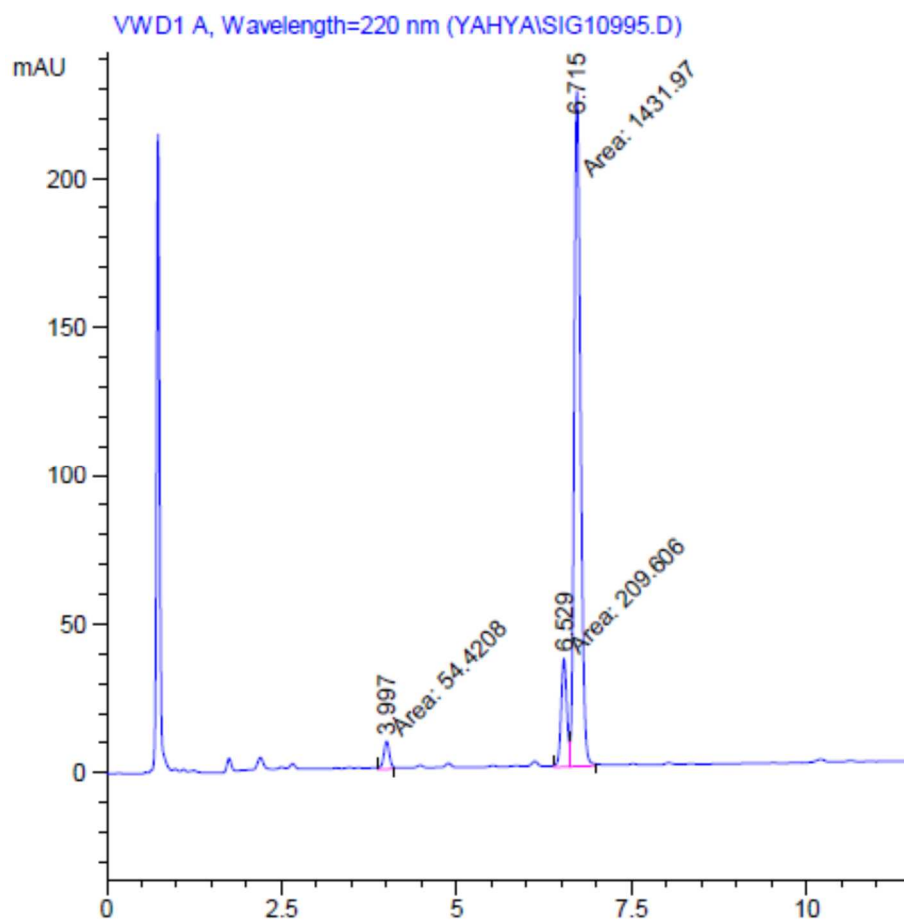

| Peak # | RetTime [min] | Type | Width [min] | Area mAU *s | Height [mAU] | Area %  |
|--------|---------------|------|-------------|-------------|--------------|---------|
| 1      | 3.997         | MM   | 0.0959      | 54.42081    | 9.46010      | 3.2088  |
| 2      | 6.529         | MF   | 0.0959      | 209.60553   | 36.42484     | 12.3588 |
| 3      | 6.715         | FM   | 0.1048      | 1431.97473  | 227.80069    | 84.4324 |

Totals : 1696.00107 273.68564



# 5.4- HOAt in DMF

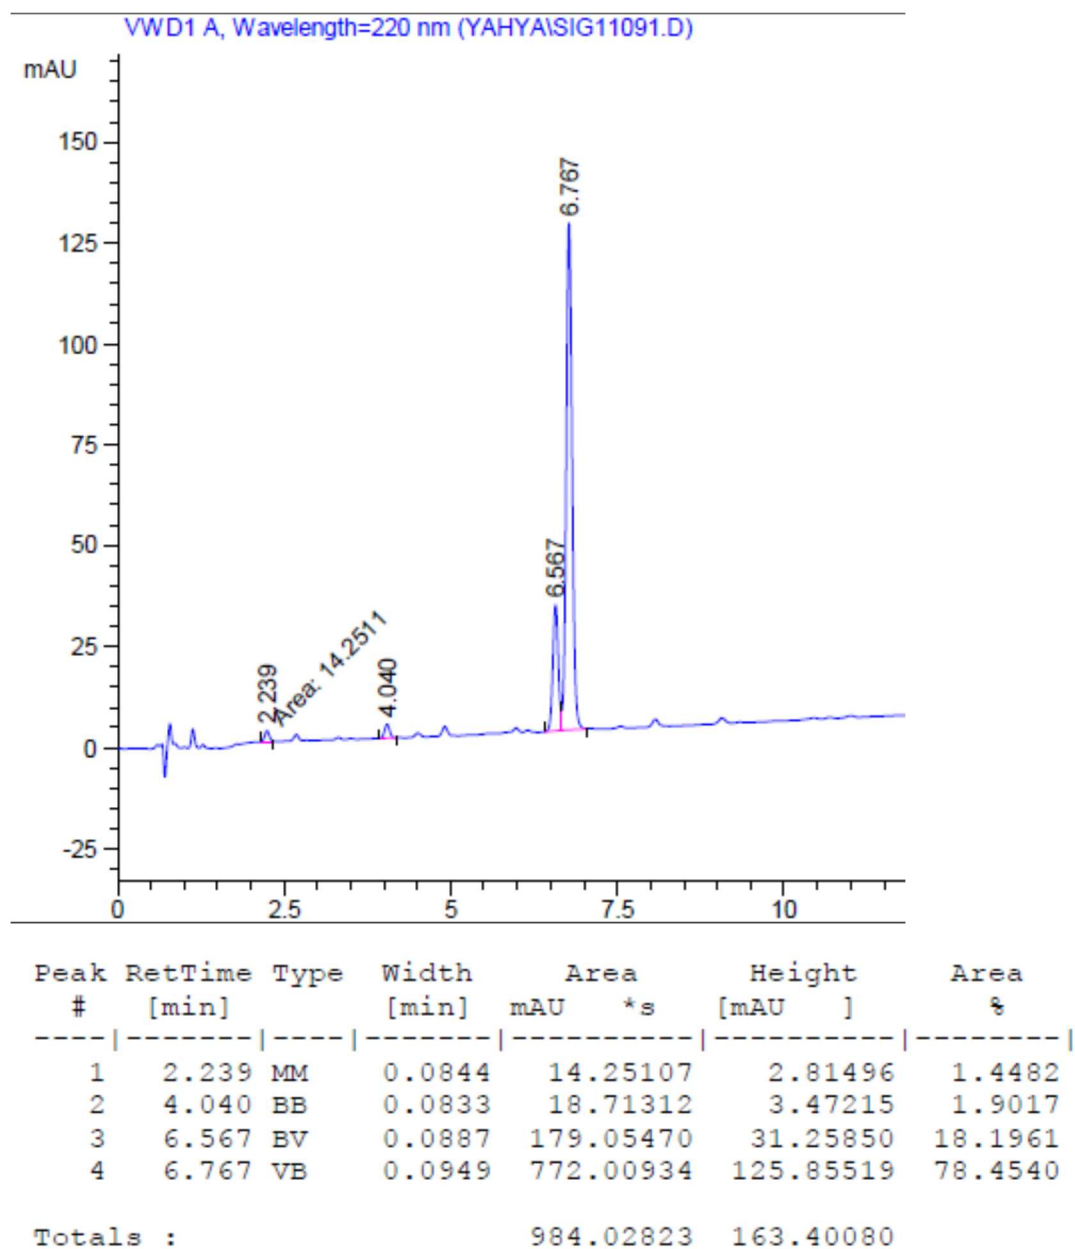

# 5.5- HOAt in THF

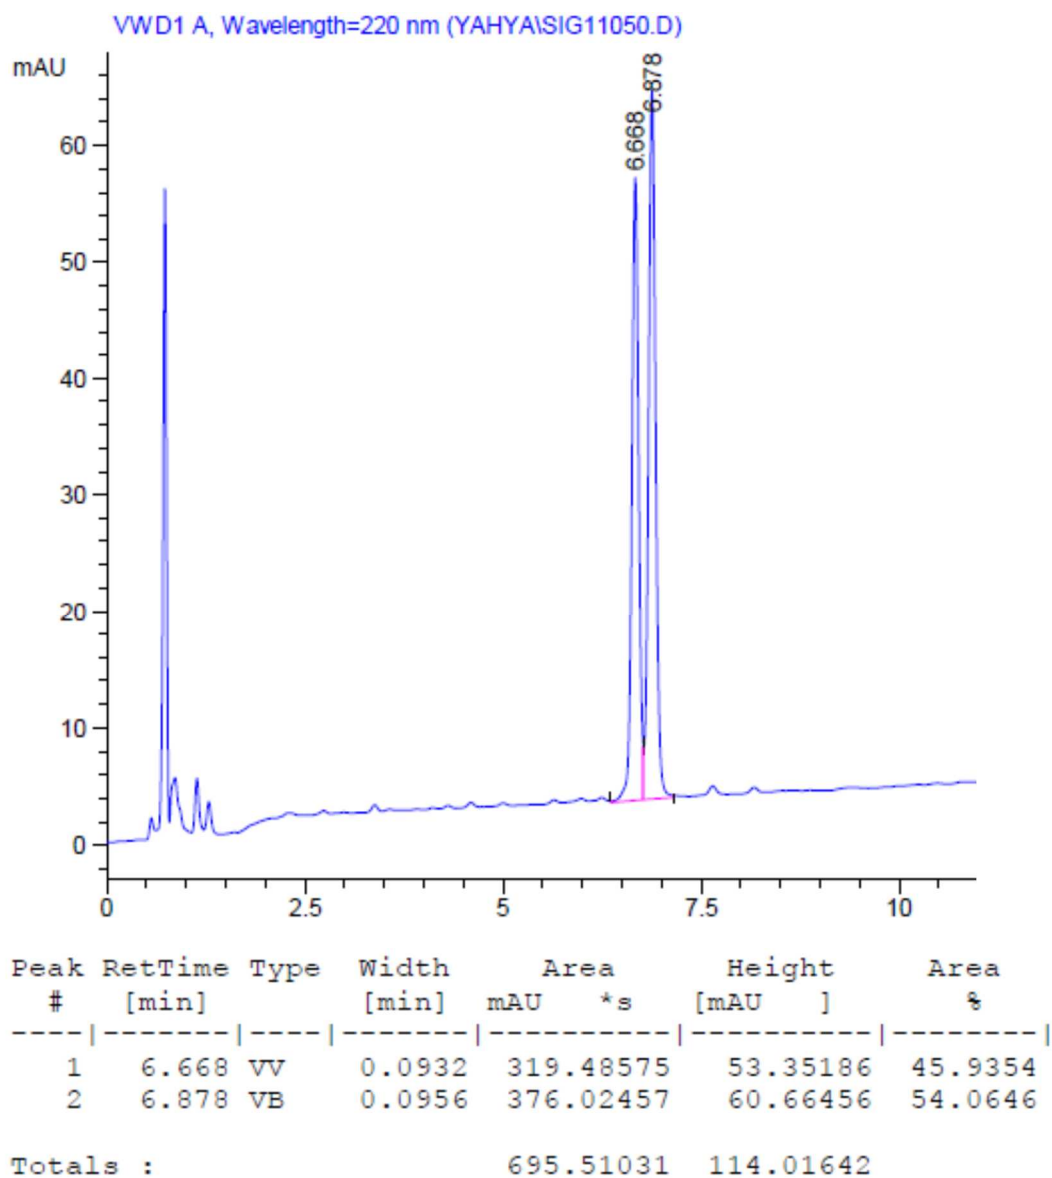

## 5.6- HOAt in ACN

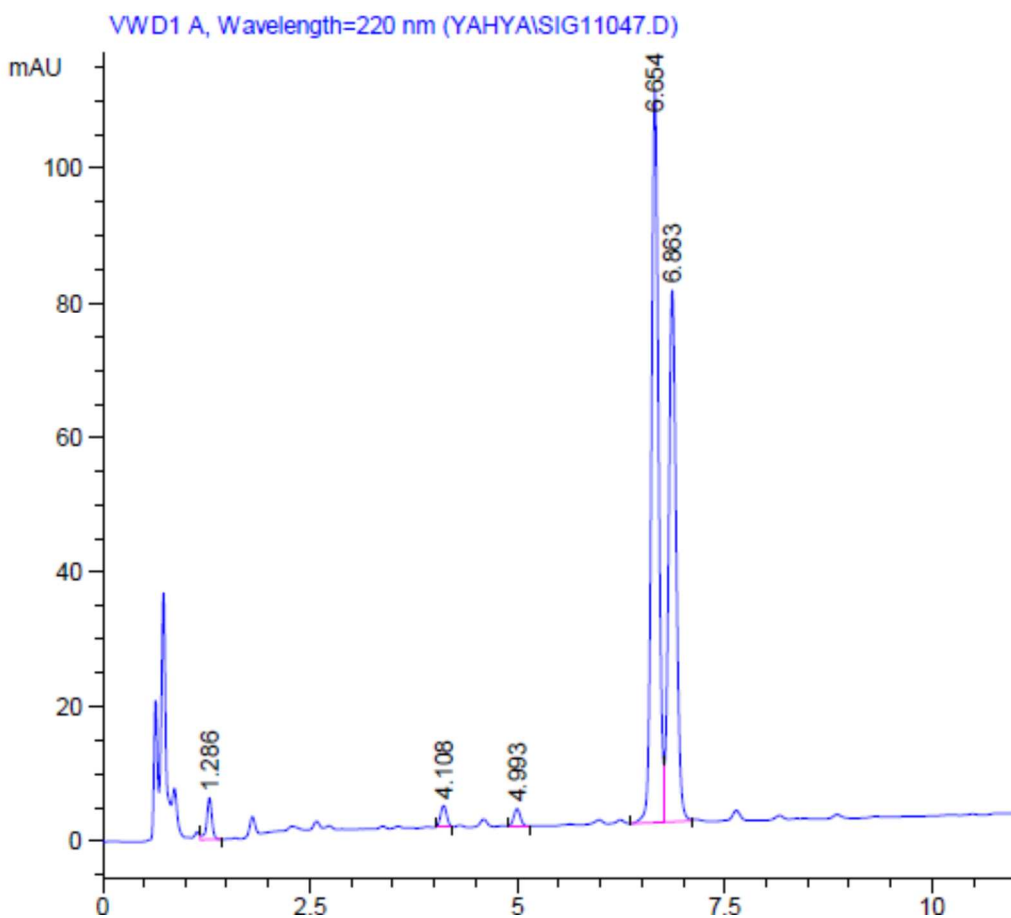

| Peak # | RetTime [min] | Type | Width [min] | Area mAU *s | Height [mAU] | Area %  |
|--------|---------------|------|-------------|-------------|--------------|---------|
| 1      | 1.286         | VP   | 0.0664      | 26.90536    | 6.22871      | 2.2345  |
| 2      | 4.108         | BV   | 0.0827      | 17.32223    | 3.24201      | 1.4386  |
| 3      | 4.993         | BP   | 0.0861      | 14.46956    | 2.62754      | 1.2017  |
| 4      | 6.654         | VV   | 0.0911      | 645.20673   | 108.71227    | 53.5851 |
| 5      | 6.863         | VB   | 0.0970      | 500.17480   | 79.16366     | 41.5400 |

Totals : 1204.07869 199.97419

# 5.7- OxymaPure in DMF

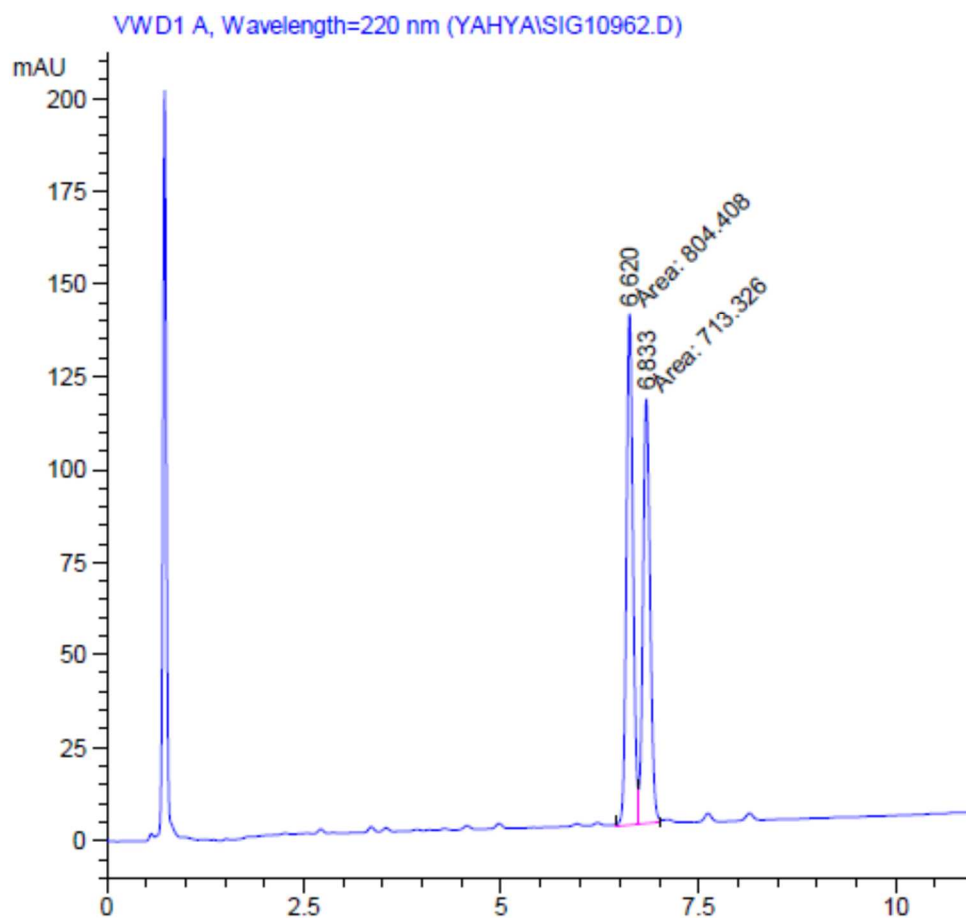

| Peak # | RetTime [min] | Type | Width [min] | Area mAU  | Area *s | Height [mAU] | Area %  |
|--------|---------------|------|-------------|-----------|---------|--------------|---------|
| 1      | 6.620         | MF   | 0.0969      | 804.40753 |         | 138.30249    | 53.0006 |
| 2      | 6.833         | FM   | 0.1036      | 713.32593 |         | 114.76675    | 46.9994 |

Totals : 1517.73346 253.06924

# 5.8- OxymaPure in THF

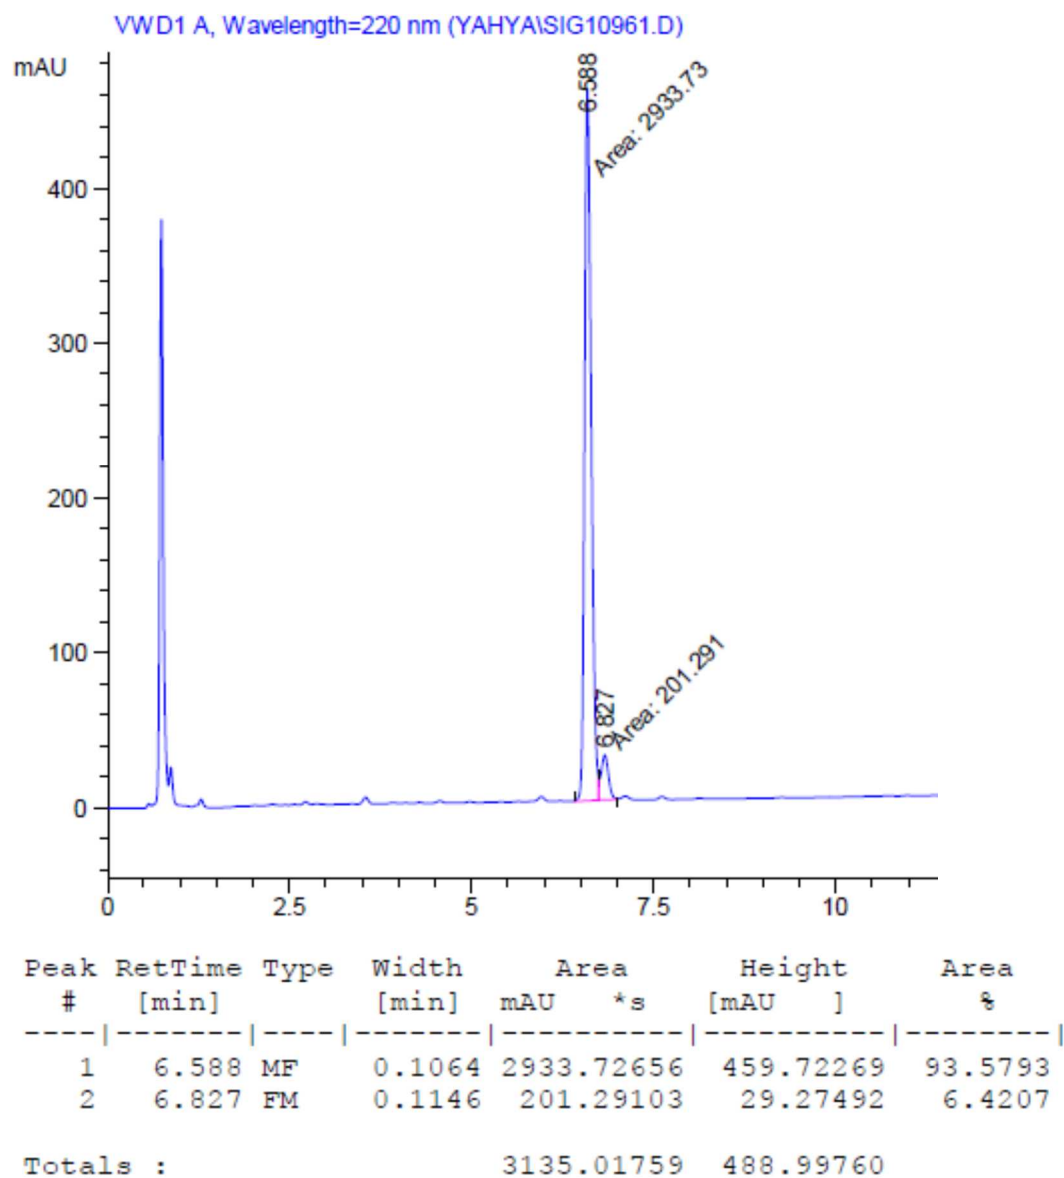

# 5.9- OxymaPure in ACN

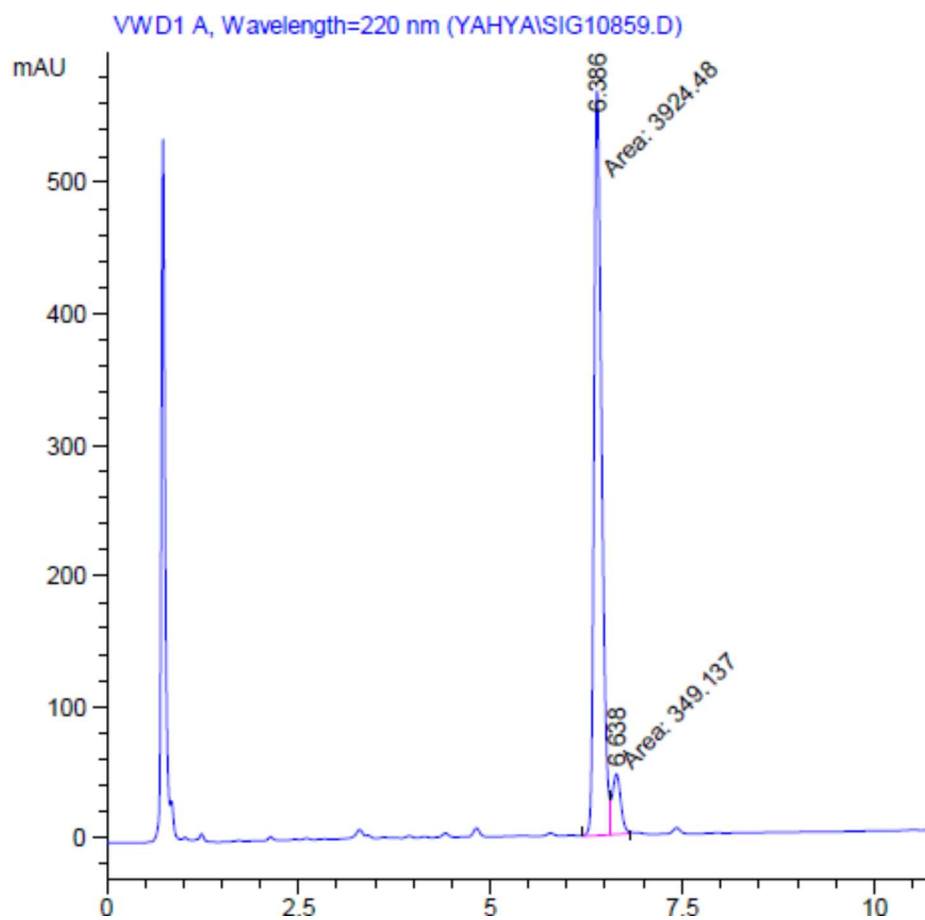

| Peak #   | RetTime [min] | Type | Width [min] | Area mAU   | Height [mAU] | Area %  |
|----------|---------------|------|-------------|------------|--------------|---------|
| 1        | 6.386         | MF   | 0.1149      | 3924.47827 | 569.50177    | 91.8304 |
| 2        | 6.638         | FM   | 0.1257      | 349.13699  | 46.29751     | 8.1696  |
| Totals : |               |      |             | 4273.61526 | 615.79928    |         |

# 5.10- Oxyma-B in DMF

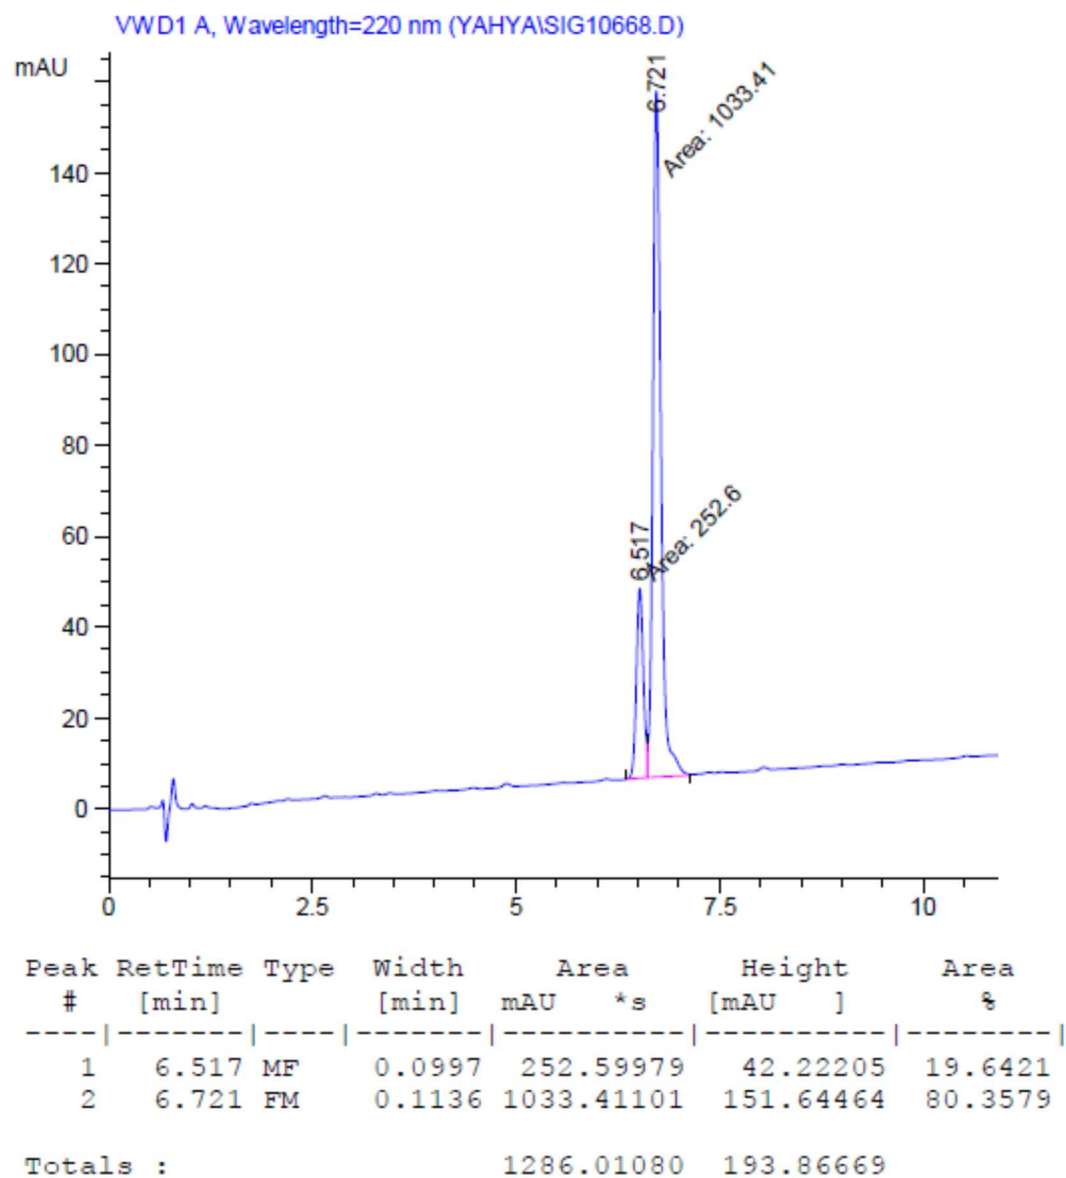

# 5.11- Oxyma-B in THF

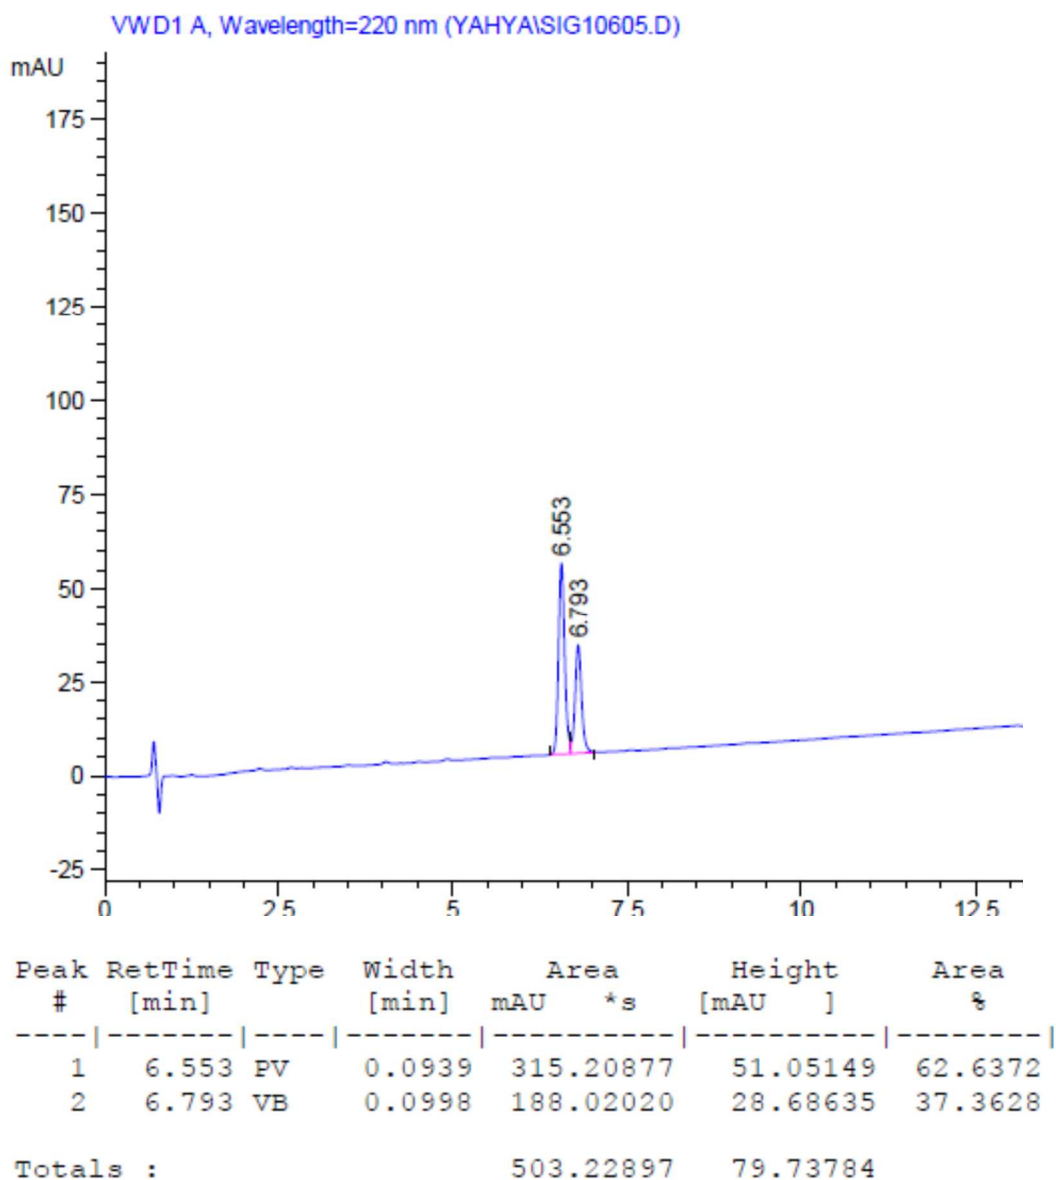



# 5.12- Oxyma-B in ACN

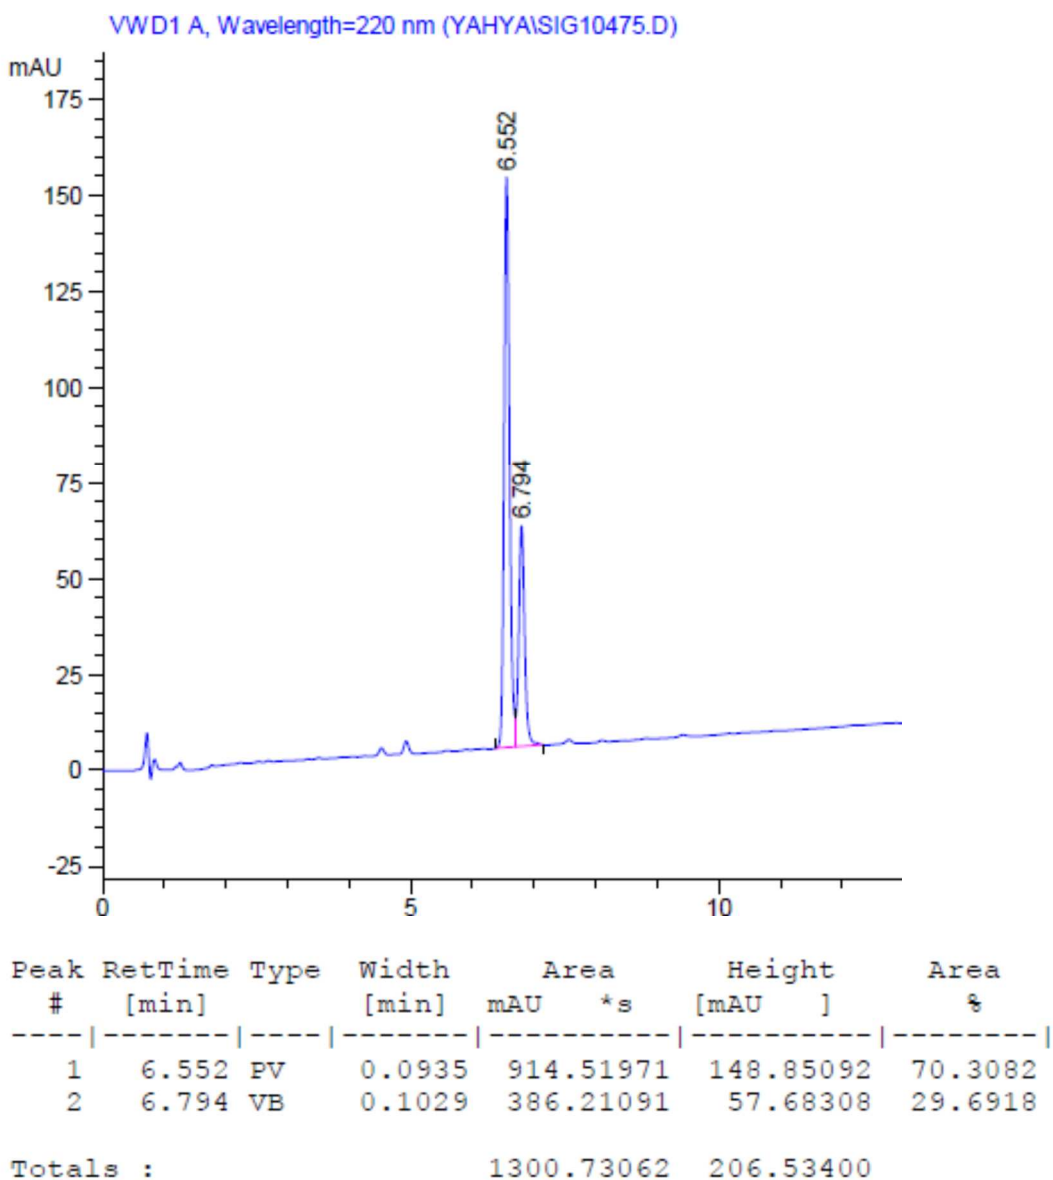

## 6- Peptide synthesis experiments (Synthesis of Aib-modified ACP decapeptide)

### 6.1- HOBt in DMF

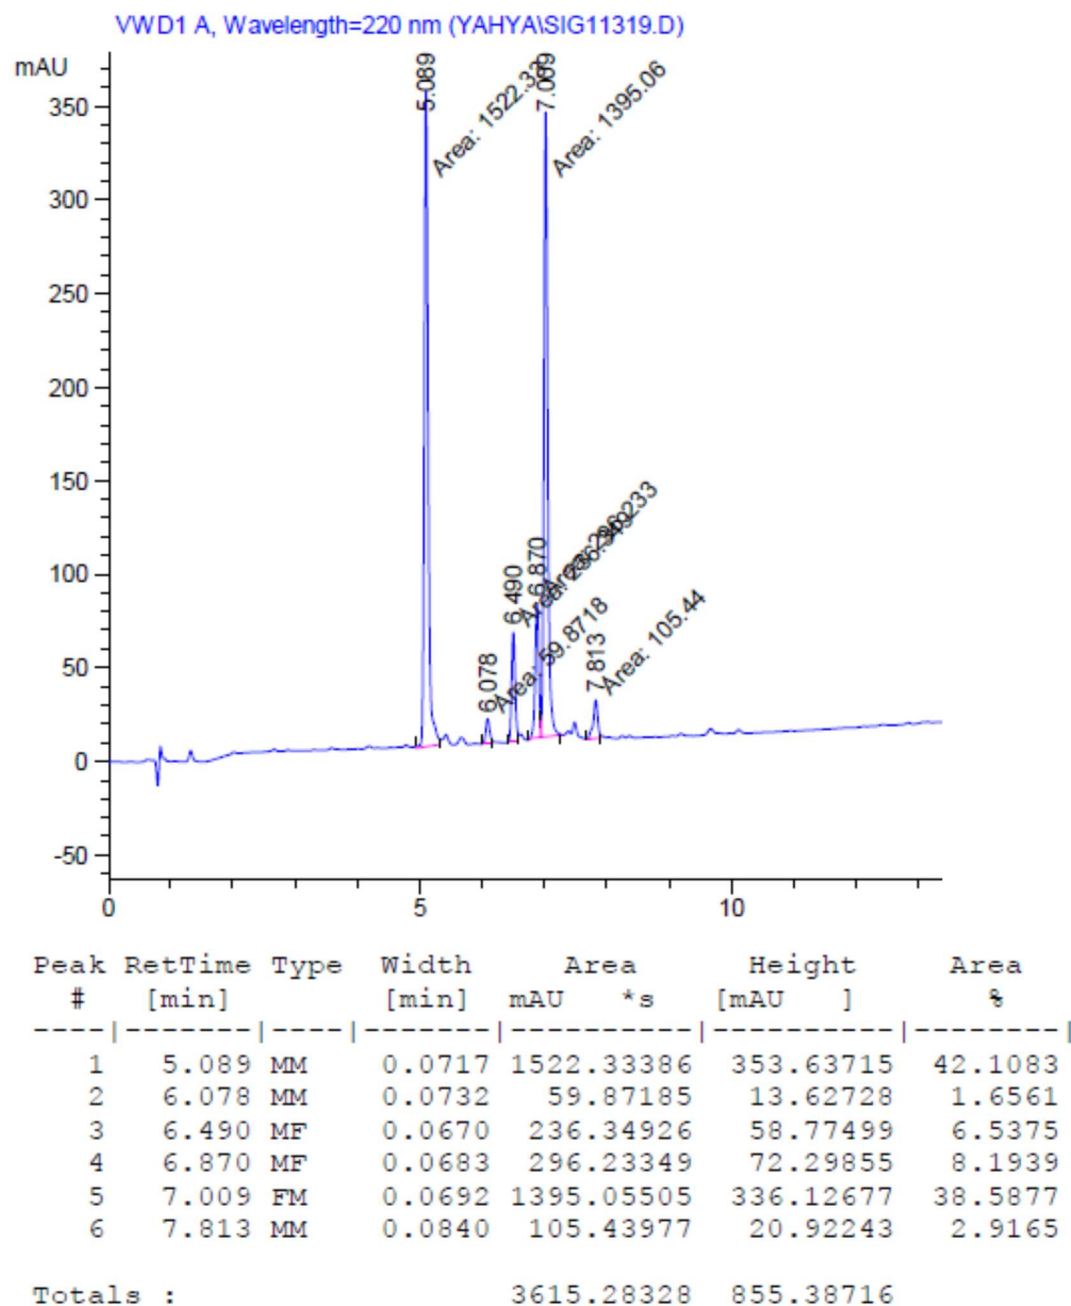

## 6.2- HOBt in THF

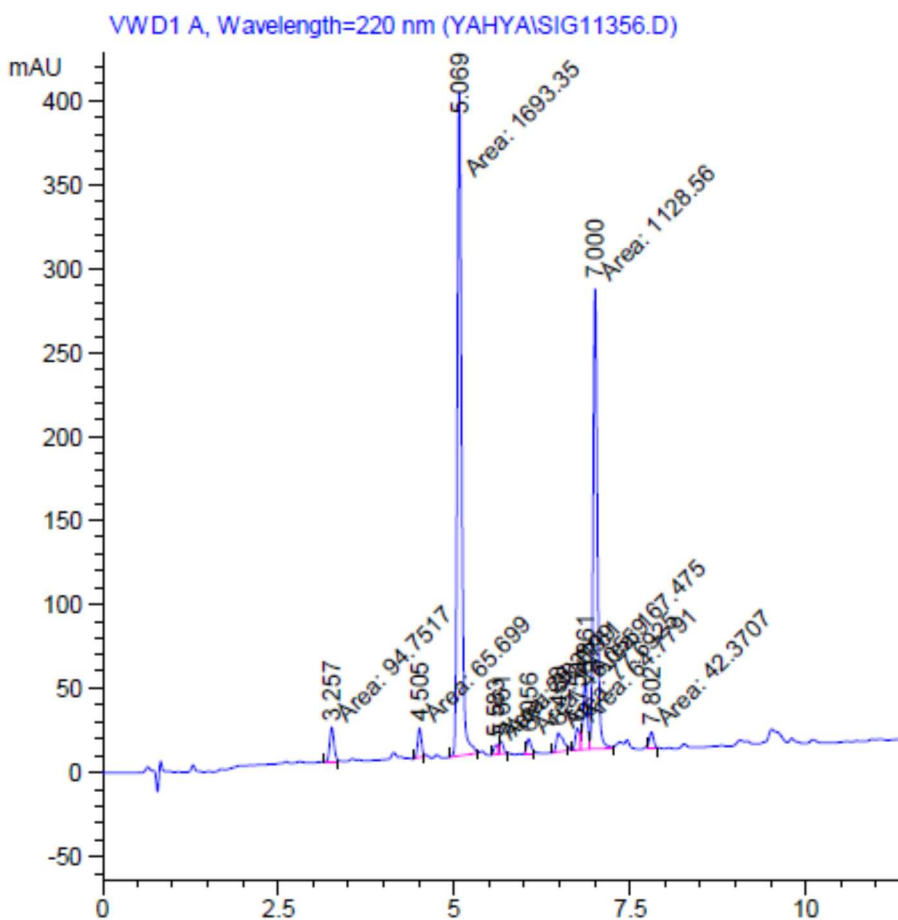

| Peak # | RetTime [min] | Type | Width [min] | Area mAU   | Height [mAU] | Area %  |
|--------|---------------|------|-------------|------------|--------------|---------|
| 1      | 3.257         | MM   | 0.0748      | 94.75173   | 21.12108     | 2.7569  |
| 2      | 4.505         | MM   | 0.0623      | 65.69898   | 17.57346     | 1.9116  |
| 3      | 5.069         | MM   | 0.0707      | 1693.34741 | 399.26398    | 49.2693 |
| 4      | 5.583         | MF   | 0.0740      | 25.31987   | 5.70302      | 0.7367  |
| 5      | 5.661         | FM   | 0.0660      | 30.87609   | 7.79360      | 0.8984  |
| 6      | 6.056         | MM   | 0.0789      | 46.05588   | 9.72683      | 1.3400  |
| 7      | 6.480         | MM   | 0.1135      | 77.69253   | 11.40971     | 2.2605  |
| 8      | 6.750         | MF   | 0.0827      | 64.77909   | 13.05362     | 1.8848  |
| 9      | 6.861         | FM   | 0.0680      | 167.47545  | 41.03422     | 4.8728  |
| 10     | 7.000         | FM   | 0.0681      | 1128.55688 | 276.34662    | 32.8362 |
| 11     | 7.802         | MM   | 0.0710      | 42.37067   | 9.94491      | 1.2328  |

Totals : 3436.92459 812.97104

### 6.3- HOBt in ACN

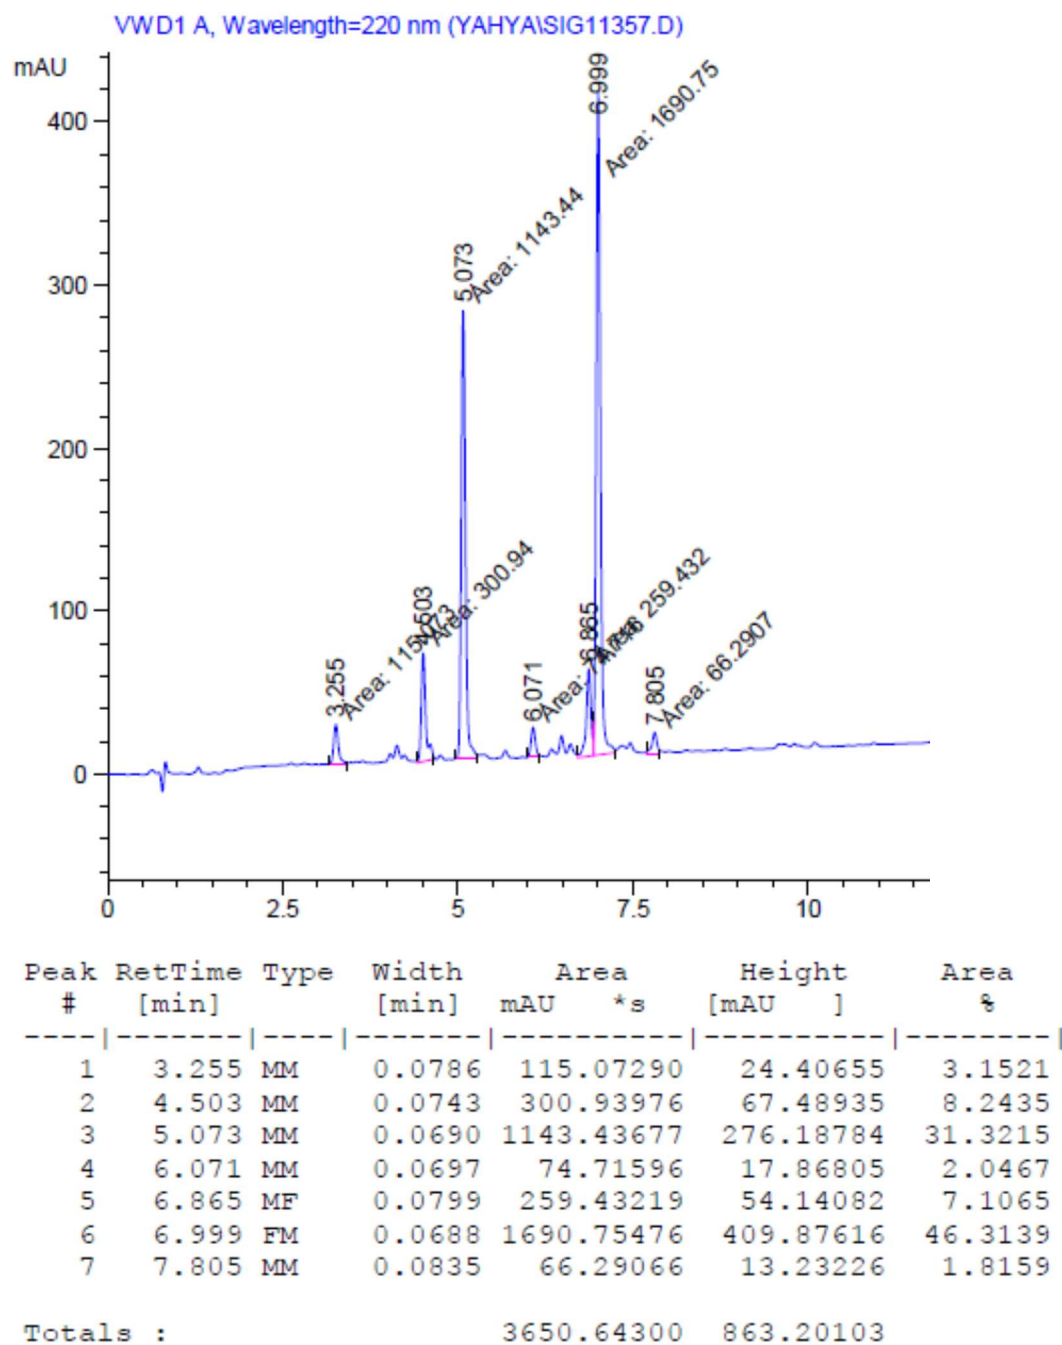

# 6.4- HOAt in DMF

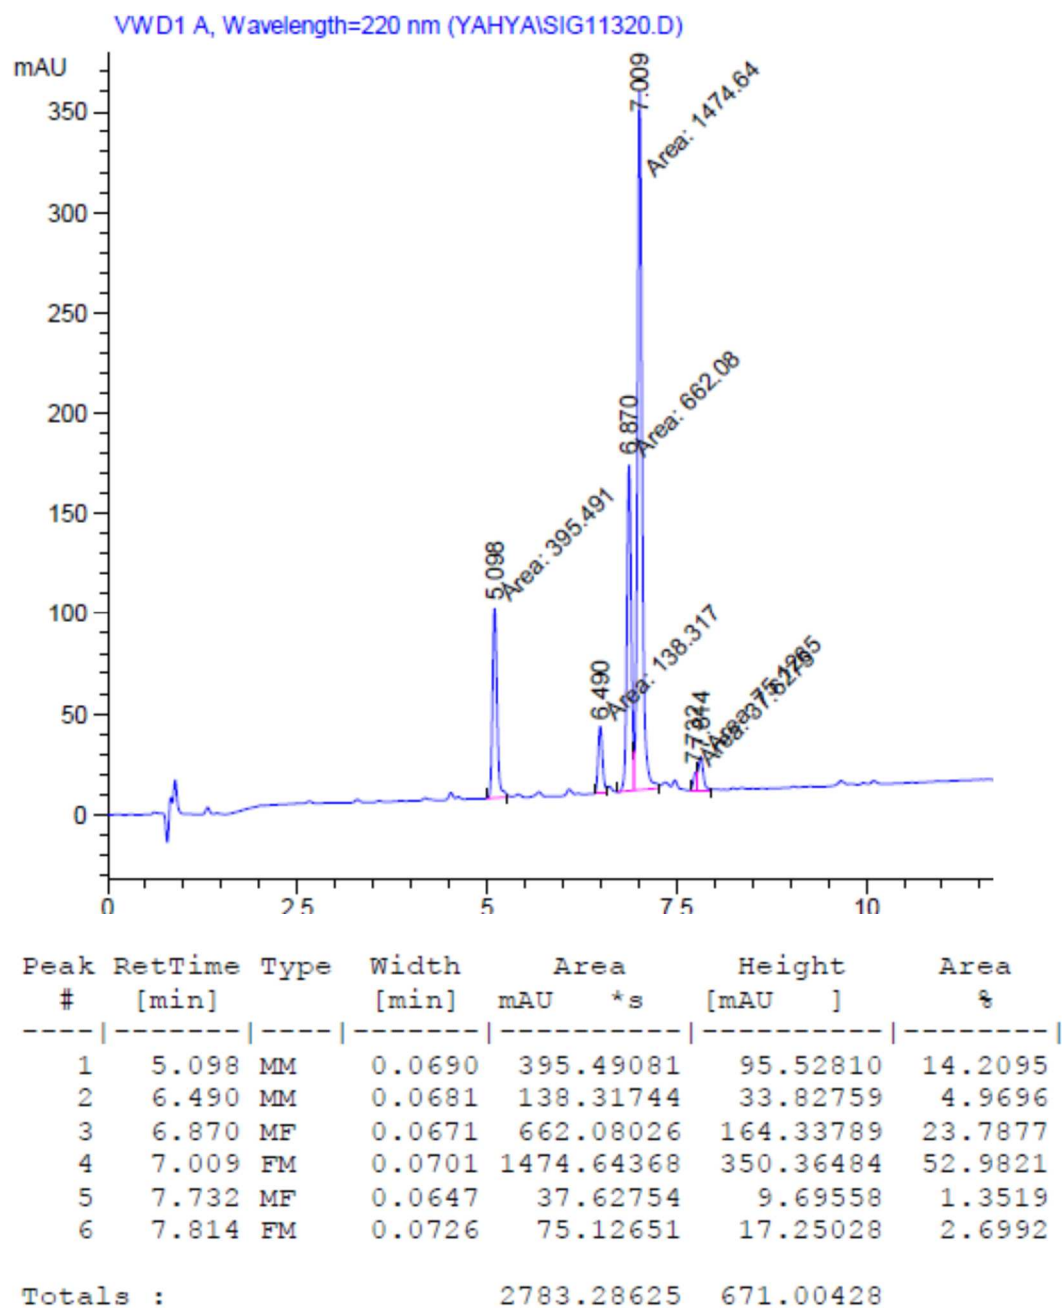

# 6.5- HOAt in THF

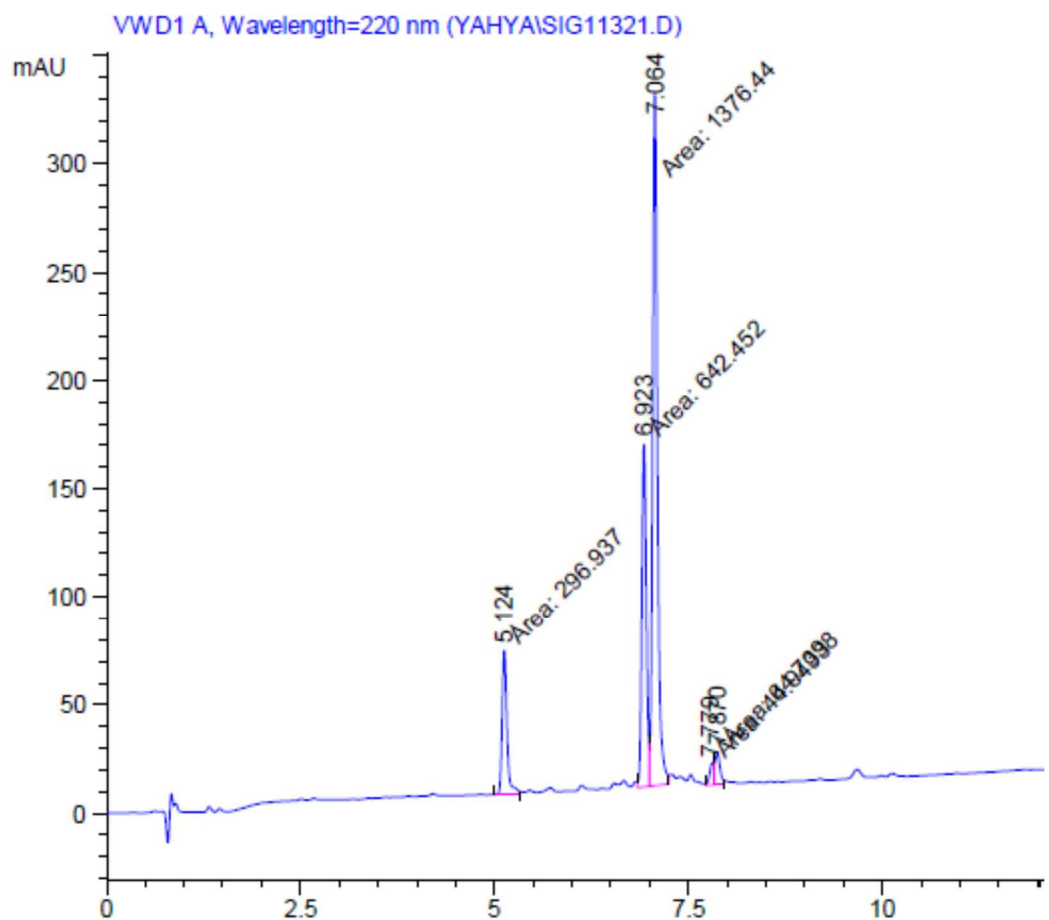

| Peak # | RetTime [min] | Type | Width [min] | Area mAU*s | Height [mAU] | Area %  |
|--------|---------------|------|-------------|------------|--------------|---------|
| 1      | 5.124         | MM   | 0.0738      | 296.93680  | 67.06278     | 12.2422 |
| 2      | 6.923         | FM   | 0.0671      | 642.45160  | 159.64384    | 26.4871 |
| 3      | 7.064         | MF   | 0.0709      | 1376.44446 | 323.46533    | 56.7484 |
| 4      | 7.779         | MF   | 0.0720      | 44.94930   | 10.39900     | 1.8532  |
| 5      | 7.870         | FM   | 0.0710      | 64.73981   | 15.20530     | 2.6691  |

Totals : 2425.52197 575.77626

# 6.6- HOAt in ACN

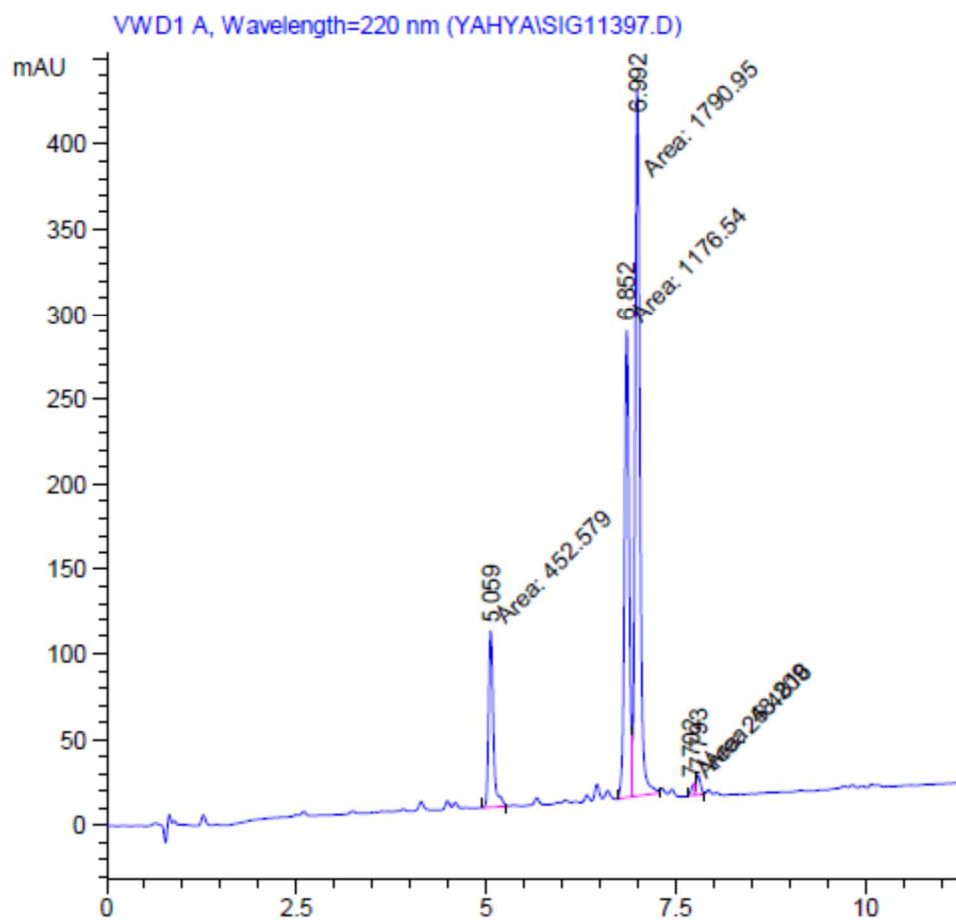

| Peak # | RetTime [min] | Type | Width [min] | Area mAU *s | Height [mAU] | Area %  |
|--------|---------------|------|-------------|-------------|--------------|---------|
| 1      | 5.059         | MM   | 0.0727      | 452.57864   | 103.81384    | 12.9539 |
| 2      | 6.852         | MF   | 0.0710      | 1176.54395  | 276.24612    | 33.6755 |
| 3      | 6.992         | FM   | 0.0714      | 1790.95044  | 417.95383    | 51.2614 |
| 4      | 7.702         | MF   | 0.0608      | 25.48162    | 6.99078      | 0.7293  |
| 5      | 7.793         | FM   | 0.0693      | 48.20901    | 11.59882     | 1.3799  |

Totals : 3493.76367 816.60339



## 6.7- OxymaPure in DMF

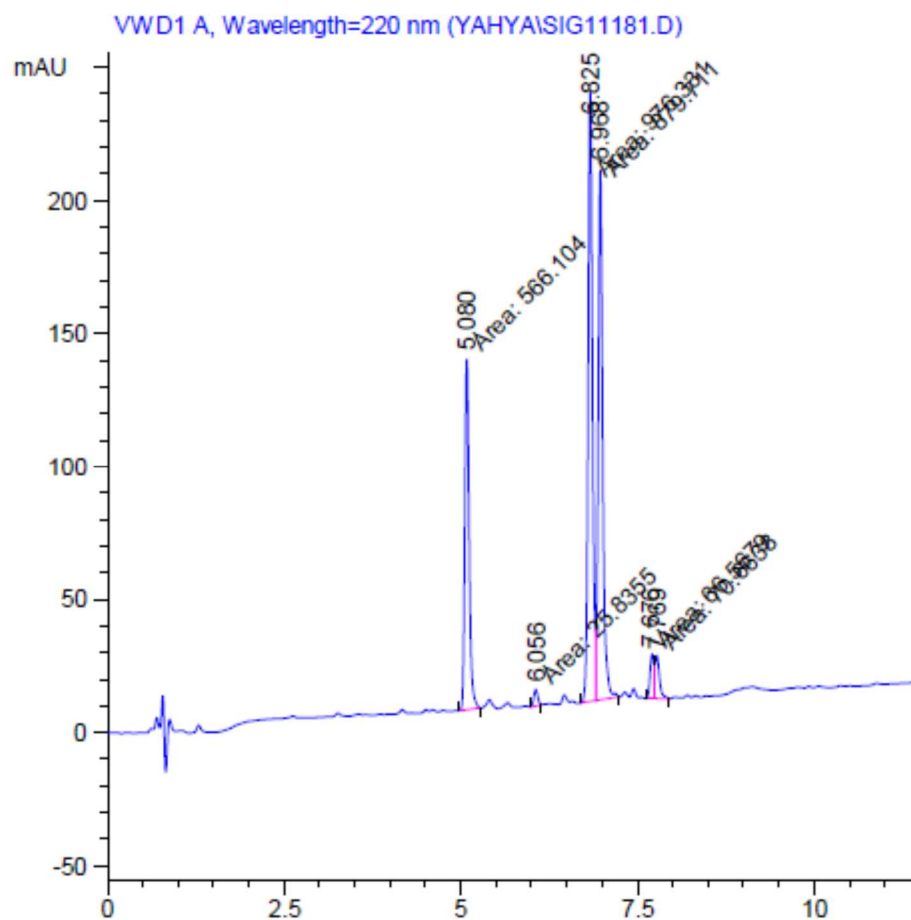

| Peak # | RetTime [min] | Type | Width [min] | Area mAU  | Height [mAU] | Area %  |
|--------|---------------|------|-------------|-----------|--------------|---------|
| 1      | 5.080         | MM   | 0.0709      | 566.10370 | 133.08109    | 21.8978 |
| 2      | 6.056         | MM   | 0.0675      | 25.83551  | 6.38302      | 0.9994  |
| 3      | 6.825         | MF   | 0.0706      | 976.33081 | 230.47884    | 37.7660 |
| 4      | 6.968         | FM   | 0.0731      | 879.71143 | 200.51784    | 34.0286 |
| 5      | 7.676         | MF   | 0.0660      | 66.56786  | 16.82010     | 2.5749  |
| 6      | 7.769         | FM   | 0.0727      | 70.66376  | 16.19696     | 2.7334  |

Totals : 2585.21306 603.47785



# 6.8- OxymaPure in THF

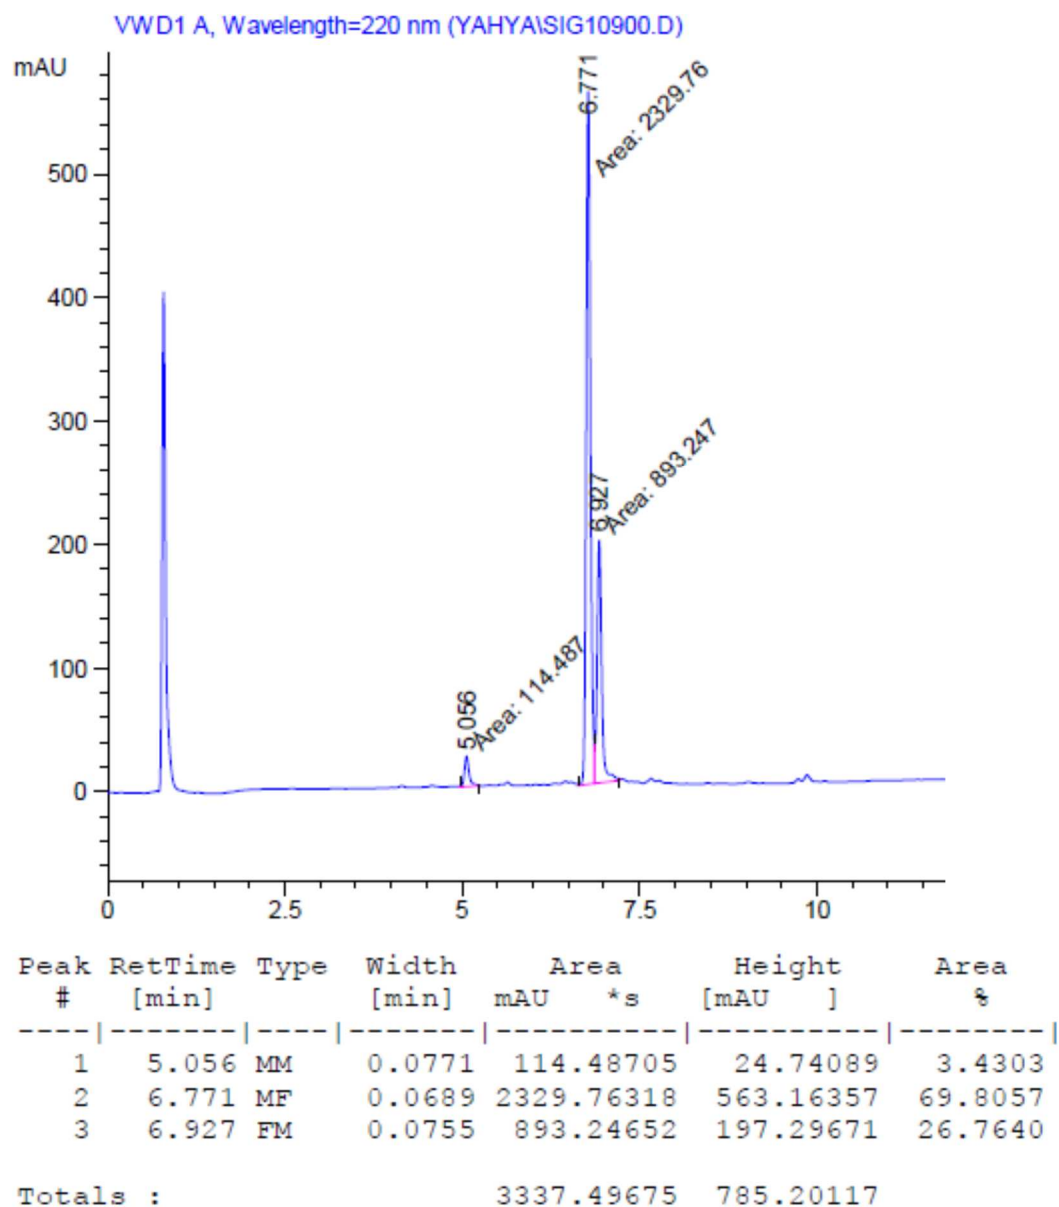

# 6.9- OxymaPure in ACN

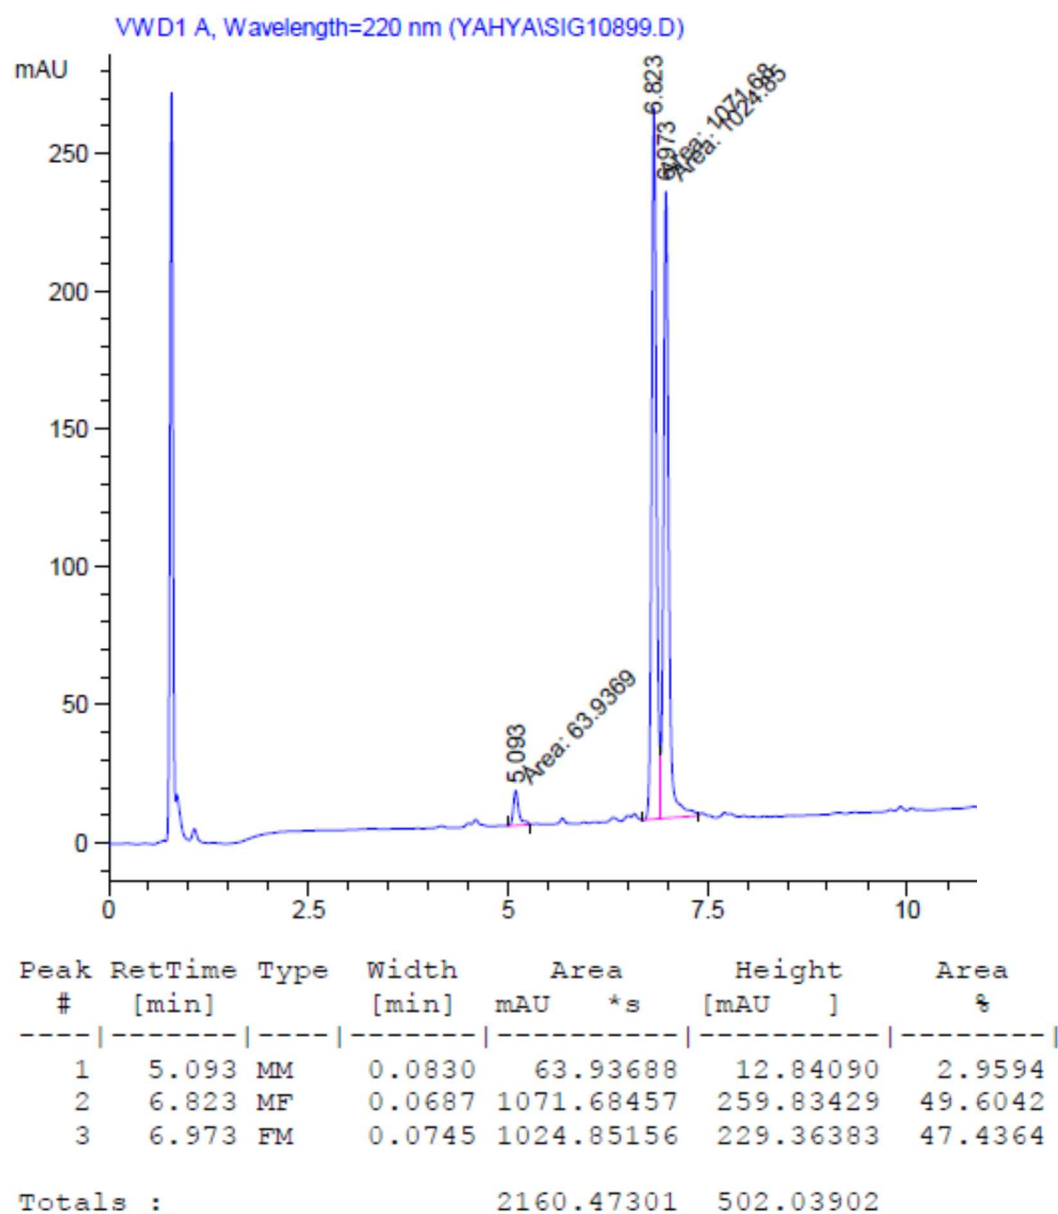

# 6.10- Oxyma-B in DMF

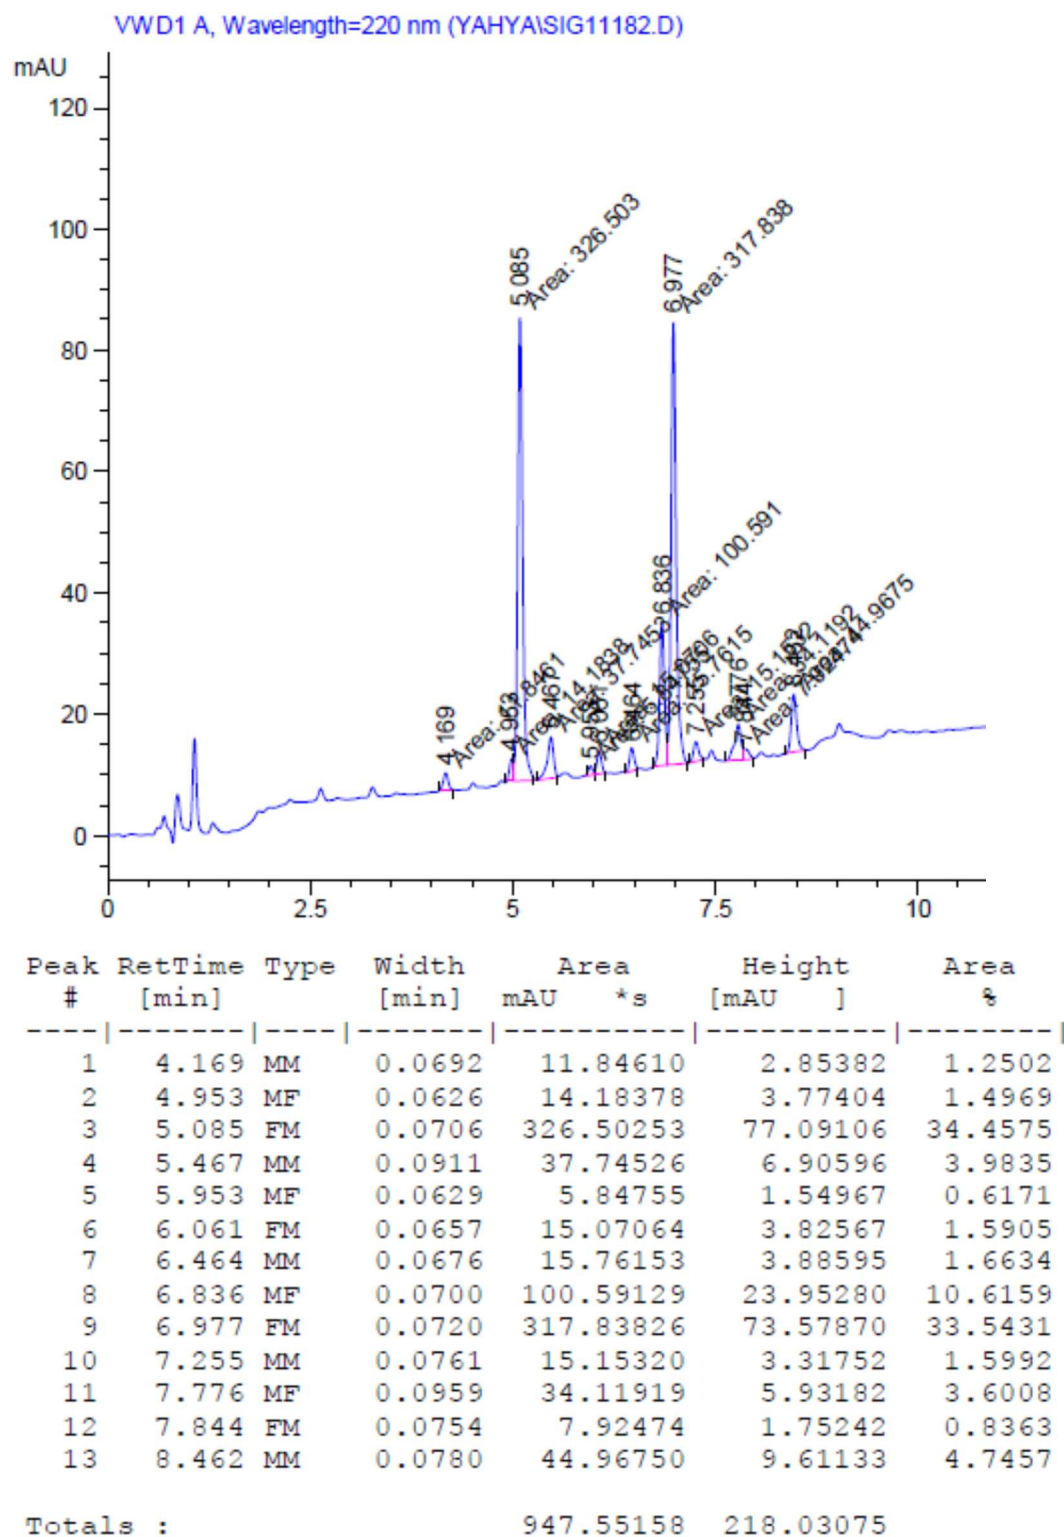

# 6.11- Oxyma-B in THF

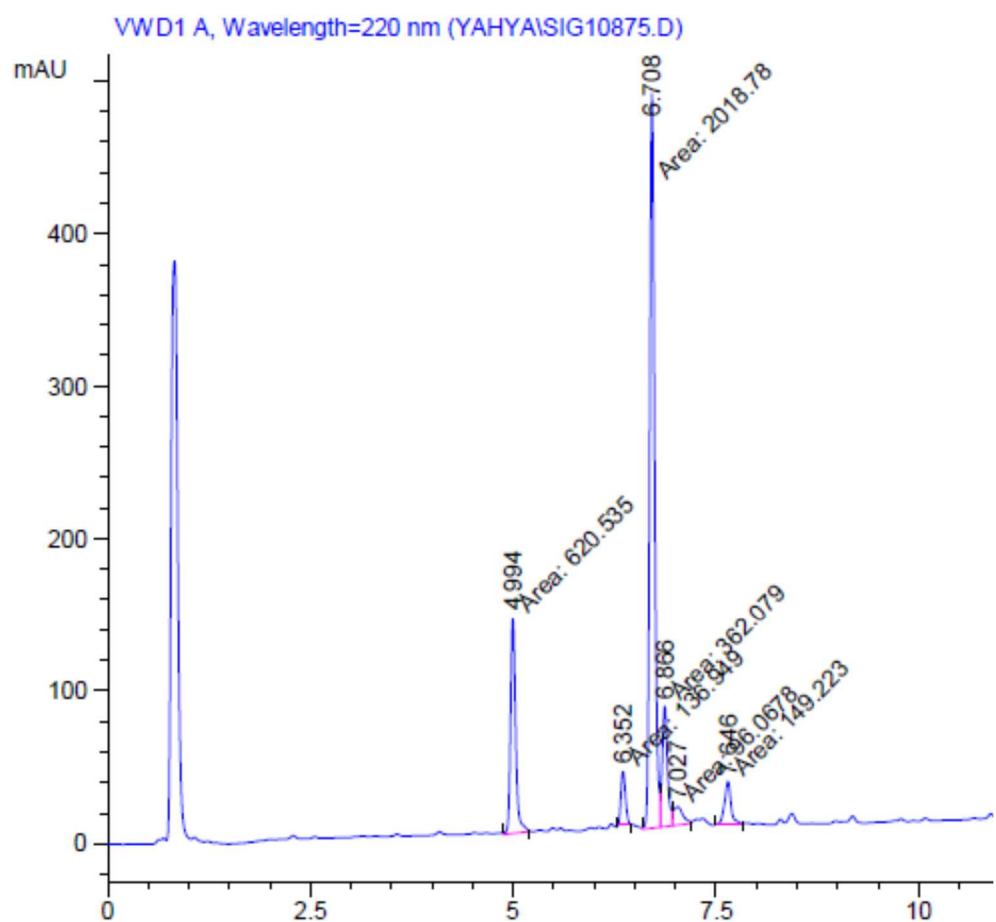

| Peak # | RetTime [min] | Type | Width [min] | Area mAU   | Height [mAU] | Area %  |
|--------|---------------|------|-------------|------------|--------------|---------|
| 1      | 4.994         | MM   | 0.0728      | 620.53467  | 142.10287    | 18.3393 |
| 2      | 6.352         | MM   | 0.0647      | 136.94949  | 35.28719     | 4.0474  |
| 3      | 6.708         | MF   | 0.0694      | 2018.78015 | 484.92331    | 59.6631 |
| 4      | 6.866         | MF   | 0.0758      | 362.07907  | 79.57053     | 10.7009 |
| 5      | 7.027         | FM   | 0.1308      | 96.06782   | 12.23791     | 2.8392  |
| 6      | 7.646         | MM   | 0.0894      | 149.22276  | 27.82842     | 4.4101  |

Totals : 3383.63396 781.95024

# 6.12- Oxyma-B in ACN

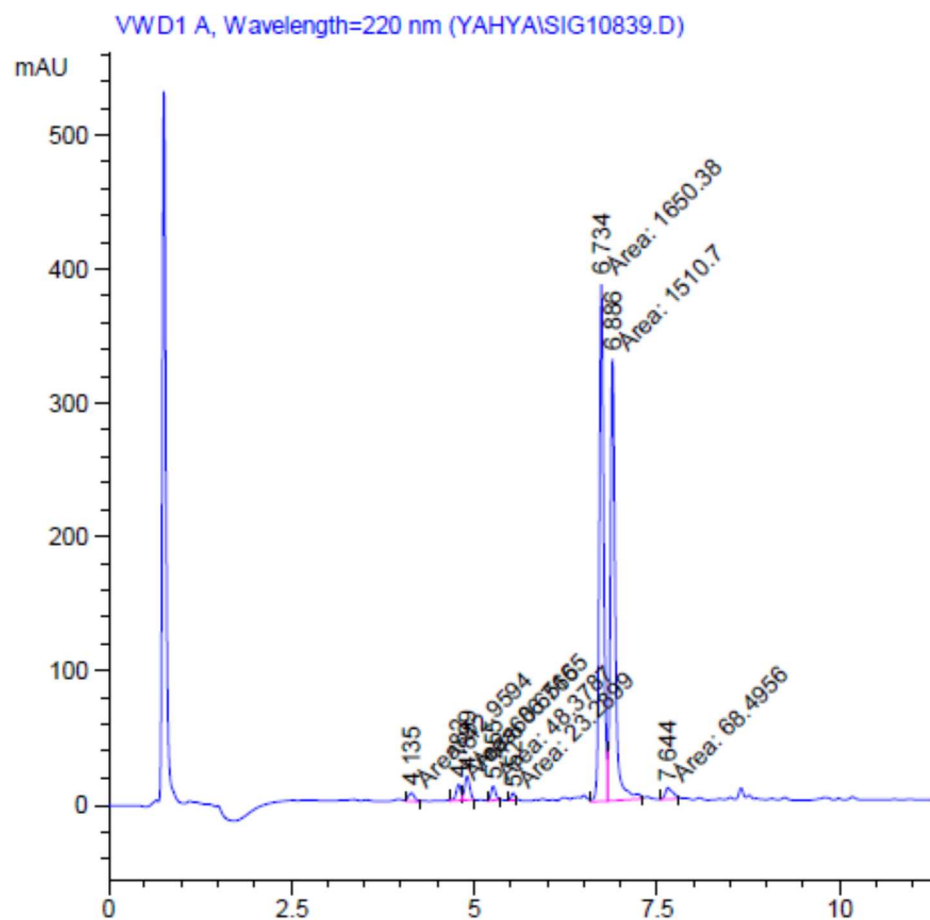

| Peak # | RetTime [min] | Type | Width [min] | Area mAU   | Height [mAU] | Area %  |
|--------|---------------|------|-------------|------------|--------------|---------|
| 1      | 4.135         | MM   | 0.1092      | 42.95938   | 6.55540      | 1.2304  |
| 2      | 4.782         | MF   | 0.0814      | 60.65647   | 12.41274     | 1.7372  |
| 3      | 4.899         | FM   | 0.0792      | 86.71651   | 18.24301     | 2.4836  |
| 4      | 5.255         | MM   | 0.0737      | 48.37871   | 10.94215     | 1.3856  |
| 5      | 5.528         | MM   | 0.0626      | 23.28985   | 6.19931      | 0.6670  |
| 6      | 6.734         | MF   | 0.0706      | 1650.38013 | 389.50598    | 47.2675 |
| 7      | 6.886         | FM   | 0.0758      | 1510.69861 | 332.12930    | 43.2670 |
| 8      | 7.644         | MM   | 0.1268      | 68.49562   | 9.00487      | 1.9617  |

Totals : 3491.57527 784.99276

6.13- des-Aib-Ile<sup>72</sup>-Asn

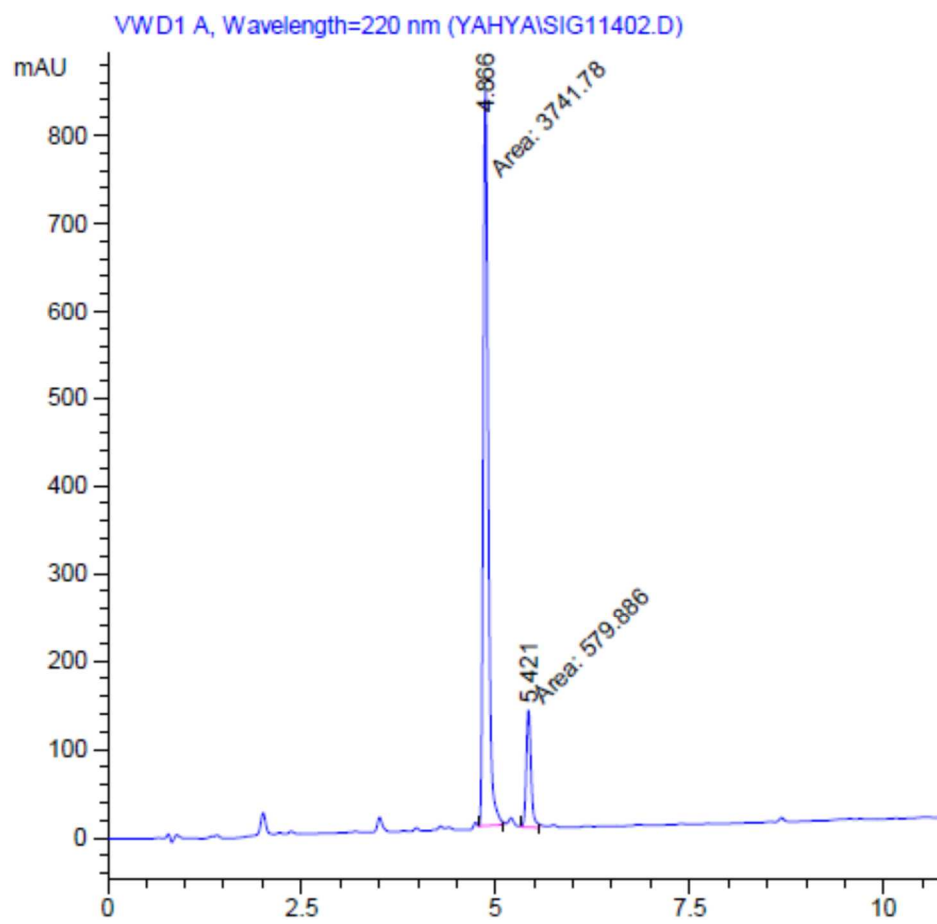

6.14- des-Aib-Ile<sup>72</sup>-Asn mixed with Aib-modified ACP decapeptide obtained from HOBt and THF

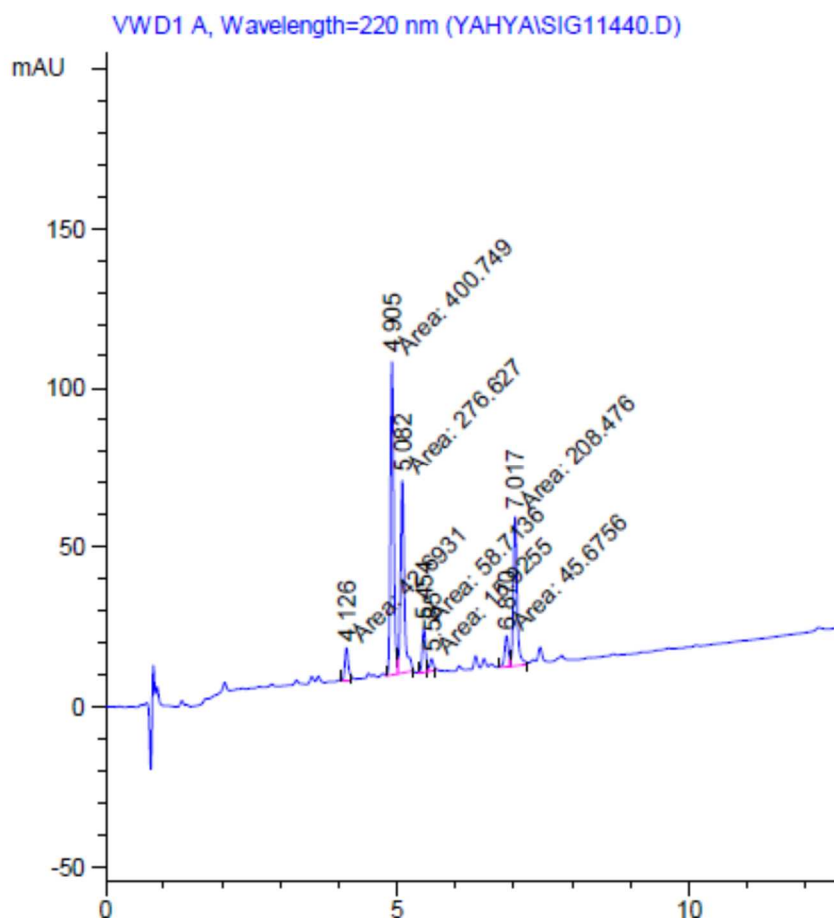

Supplement: c4ob02046d1.pdf [file c4ob02046d1.pdf]
